# Supplementary material for: Ribosomal DNA copy number amplification and loss in human cancers is linked to tumor genetic context, nucleolus activity, and proliferation
Source: PubMed Central journal article supplement (PMC5605086; doi:10.1371/journal.pgen.1006994), 2017-09-07

**A**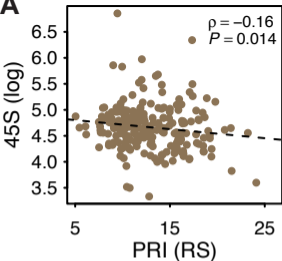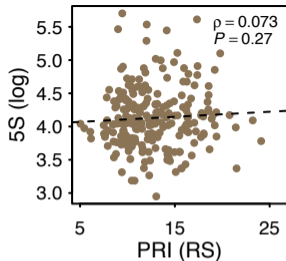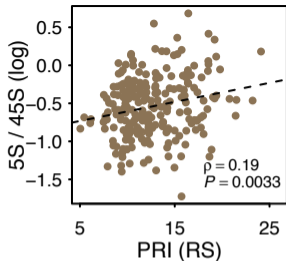**B**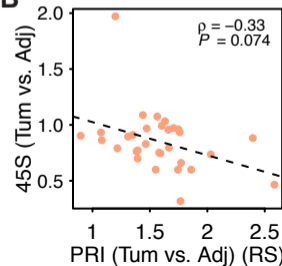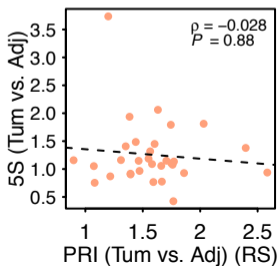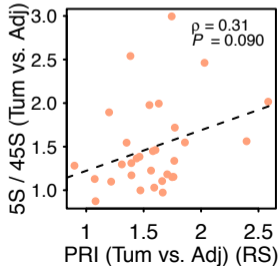

Supplement: pgen.1006994.s009.pdf [file pgen.1006994.s009.pdf]
