# Supplementary material for: Ribosomal DNA copy number amplification and loss in human cancers is linked to tumor genetic context, nucleolus activity, and proliferation
Source: PLOS journal article supplement (doi:10.1371/journal.pgen.1006994), 2017-09-07

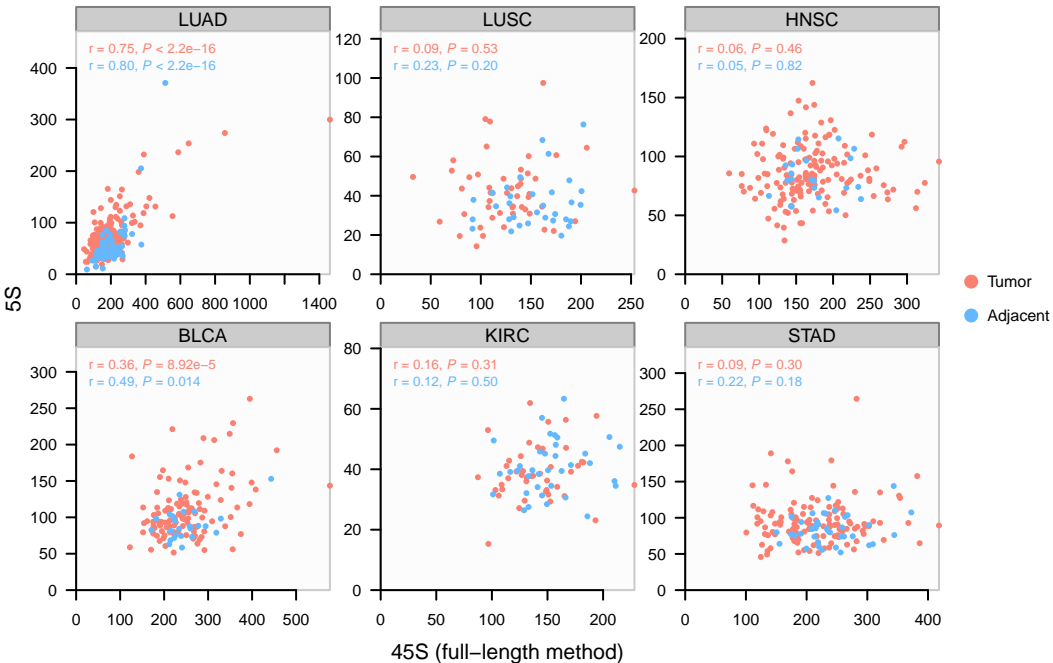

Supplement: S4 (10.1371/journal.pgen.1006994.s004) [file journal.pgen.1006994.s004]
