# Supplementary material for: Ribosomal DNA copy number amplification and loss in human cancers is linked to tumor genetic context, nucleolus activity, and proliferation
Source: PLoS Genet. 2017 Sep 7;13(9):e1006994. doi: 10.1371/journal.pgen.1006994 (PMC5605086; doi:10.1371/journal.pgen.1006994)
Supplement: S4 Table — Each cancer type was analyzed separately. (XLSX) [file pgen.1006994.s014.xlsx]

## Sheet: Sheet1
S4 Table. Association between rDNA CN with somatic mutations, with each cancer type separated.
# Diff.*: the median value for 45S CN(or 5S CN, or the ratio of 5S/45S) of patients with non-silent mutation(s) minus that of patients without mutation
# WP.*: P values of the two-sided Wilcoxon rank sum test
CancerType	GeneName	Diff.45S	WP.45S	Diff.5S	WP.5S	Diff.ratio	WP.ratio	mutant_count (Patients with mutations)	nonmutant_count (Patients without mutations)
BLCA	STAG2	15.5116	0.409505	-1.38767	0.936862	-0.00600868	0.797732	12	101
BLCA	MUC17	10.3198	0.51056	13.2957	0.305841	-0.00119356	0.98957	14	99
BLCA	FRAS1	-12.8486	0.488595	-3.28594	0.709216	0.0697848	0.227856	11	102
BLCA	OBSCN	31.2103	0.407587	3.53871	0.380716	0.0680622	0.335171	11	102
BLCA	COL6A6	-23.3387	0.122369	9.58321	0.709216	0.0612621	0.0723766	11	102
BLCA	ANK2	2.17121	0.789959	5.58035	0.716438	0.00199862	0.564403	11	102
BLCA	LRP1	34.1007	0.476516	33.8877	0.0664338	0.0585382	0.325547	11	102
BLCA	FBXW7	-14.673	0.525801	9.58321	0.687709	-0.0163025	0.611094	11	102
BLCA	DST	-43.1835	0.0326235	-12.7914	0.118462	0.0116105	0.8756	15	98
BLCA	BIRC6	8.83427	0.74939	-2.51054	0.982052	-0.0045918	0.74939	13	100
BLCA	CSMD2	31.1336	0.167613	0.511396	0.3874	-0.00939237	0.995967	10	103
BLCA	ERCC2	-14.3356	0.362456	11.8107	0.477546	0.0324349	0.314147	14	99
BLCA	CELSR3	-0.636086	0.95566	18.1361	0.0727502	0.0715957	0.0416483	10	103
BLCA	DNAH5	30.3989	0.261444	-18.9507	0.0684644	-0.0626368	0.116342	12	101
BLCA	EP300	48.4757	0.0446898	8.28591	0.715363	-0.0184435	0.284189	19	94
BLCA	CREBBP	-11.4375	0.582227	-4.64339	0.497371	0.0280381	0.255786	17	96
BLCA	GPR98	-14.3356	0.547773	0.511396	0.637906	0.0794042	0.175109	12	101
BLCA	XIRP2	8.8206	0.407856	-8.29855	0.970437	0.0103471	0.904946	16	97
BLCA	SPTA1	26.225	0.659423	-9.15272	0.687709	0.0680622	0.544932	11	102
BLCA	SPTAN1	-24.5602	0.405261	-7.03209	0.906345	0.0510188	0.56223	14	99
BLCA	UBR4	0.579499	0.981412	-6.41894	0.523228	-4.43e-05	0.692051	12	101
BLCA	FAT3	-34.7382	0.176635	-4.64339	0.396705	-0.0045918	0.544932	11	102
BLCA	FREM2	12.5561	0.320803	19.515	0.124729	-0.00179256	0.680594	11	102
BLCA	LAMA2	-7.19062	0.870448	10.9667	0.353782	0.0559162	0.238438	12	101
BLCA	HMCN1	15.6883	0.682034	-4.04341	0.650408	-0.0117579	0.444274	22	91
BLCA	SACS	29.1957	0.441281	-15.2037	0.209722	-0.0136375	0.213263	11	102
BLCA	CSMD3	2.39233	0.485099	4.66786	0.989873	-0.00672745	0.528414	15	98
BLCA	FAT1	16.0026	0.17854	-7.37109	0.953359	-0.0652786	0.102424	13	100
BLCA	CHD7	2.74536	0.972956	-2.51054	0.645457	-0.0045918	0.949799	11	102
BLCA	EIF4G3	-5.07973	0.987901	-7.98616	0.238905	-0.0132579	0.263963	10	103
BLCA	RB1	-5.54792	0.990812	7.89657	0.29115	0.0609017	0.023765	19	94
BLCA	LRRC7	16.6952	0.293293	5.89364	0.972956	-0.00179256	0.873024	11	102
BLCA	PCLO	13.3835	0.666451	5.66123	0.988408	-0.0163025	0.590874	11	102
BLCA	TRIO	-17.2748	0.551385	-10.1804	0.738255	0.00235762	0.972956	11	102
BLCA	COL7A1	10.4966	0.43647	0.132734	0.592052	-0.011541	0.273505	12	101
BLCA	DNAH3	8.83427	0.939032	-3.28594	0.662529	-0.0172168	0.496896	13	100
BLCA	PDE4DIP	-4.11061	0.911364	4.75556	0.413579	-0.00179256	0.588345	19	94
BLCA	ATM	13.9366	0.193508	-4.29551	0.889074	-0.0690532	0.0582026	13	100
BLCA	NCOR1	-3.51181	0.835822	8.00966	0.457463	0.0452781	0.208174	10	103
BLCA	FGFR3	22.9939	0.415762	-9.55821	0.616787	-0.0119735	0.3986	10	103
BLCA	USH2A	-8.05788	0.757829	-17.7738	0.0359341	-0.0386652	0.167613	10	103
BLCA	NKTR	27.6545	0.623922	16.2965	0.309638	-0.0128566	0.867525	10	103
BLCA	LYST	18.259	0.420175	-14.7574	0.154196	-0.086941	0.0125325	14	99
BLCA	ERBB3	20.4972	0.577567	12.6584	0.195986	0.00199862	0.424238	11	102
BLCA	PIK3CA	18.8448	0.405482	9.50846	0.137615	0.042737	0.281225	24	89
BLCA	NCOR2	17.1911	0.164522	-0.767752	0.867525	-0.0489119	0.149706	10	103
BLCA	VPS13D	-6.68669	0.495002	8.43945	0.392976	0.0577922	0.223161	10	103
BLCA	TTN	20.2241	0.394748	-9.54575	0.705491	-0.013539	0.692675	62	51
BLCA	LRP1B	6.93527	0.396705	7.52331	0.231613	0.0886392	0.0771137	11	102
BLCA	NFE2L2	54.0018	0.0104092	26.0382	0.00447159	0.048327	0.557876	11	102
BLCA	TPO	26.2068	0.482309	16.9305	0.0396636	0.119391	0.0368373	10	103
BLCA	CDKN1A	19.8168	0.251539	-10.335	0.969624	-0.0137115	0.976372	15	98
BLCA	KDM6A	-5.54792	0.805873	3.53871	0.774762	-0.00523776	0.975829	27	86
BLCA	TCHH	31.4575	0.0727502	11.8107	0.812216	-0.0375478	0.304849	10	103
BLCA	RYR2	12.8649	0.57126	-10.0999	0.560392	-0.00523776	0.370534	17	96
BLCA	AHNAK2	-26.5029	0.280623	0.876897	0.367473	-0.0283572	0.459035	15	98
BLCA	PKHD1L1	9.90595	0.347046	-10.0999	0.1728	-0.0764925	0.0898474	13	100
BLCA	DSP	-42.259	0.0727502	11.6694	0.109085	0.0904762	0.00684632	10	103
BLCA	FAT4	11.2032	0.878786	11.718	0.28967	0.0555811	0.214289	14	99
BLCA	SYNE1	-11.0053	0.481816	5.53391	0.783636	0.0055062	0.520093	20	93
BLCA	HRNR	20.4007	0.931523	-4.68758	0.65281	0.0186525	0.939563	10	103
BLCA	MACF1	14.251	0.83773	9.6276	0.195615	0.0266778	0.435407	14	99
BLCA	SCN1A	27.18	0.0925402	28.3601	0.0889831	0.00948157	0.604999	12	101
BLCA	GCC2	-35.3628	0.167613	-2.76946	0.995967	0.0579864	0.344548	10	103
BLCA	ANKHD1	-4.41044	0.947609	-1.29338	0.623922	0.0318408	0.931523	10	103
BLCA	MUC16	9.18791	0.603502	14.7285	0.0478486	0.0164662	0.165731	32	81
BLCA	ABCA13	-18.5535	0.544932	-24.0372	0.0693529	-0.0136375	0.275859	11	102
BLCA	TBC1D12	4.31933	0.863116	9.93208	0.393813	0.0280341	0.553998	12	101
BLCA	TP53	-5.54792	0.677164	8.78315	0.178098	0.0202694	0.235685	57	56
BLCA	DNAH11	31.4225	0.229639	7.54231	0.860711	0.00199862	0.79066	13	100
BLCA	HERC1	-21.3471	0.36025	-9.29894	0.482309	0.0399123	0.65281	10	103
BLCA	RELN	-1.03729	0.812216	8.75113	0.68966	0.0674573	0.433352	10	103
BLCA	FLG	-29.994	0.123741	-11.3559	0.21503	0.0680622	0.715363	19	94
BLCA	ZFHX4	-12.1644	0.400361	-0.414952	0.803847	0.011083	0.493905	14	99
BLCA	RANBP2	-2.30502	0.947609	19.4412	0.0396636	0.0678	0.0665306	10	103
BLCA	SYNE2	-5.65848	0.769417	-3.28594	0.477235	0.0226528	0.272968	17	96
BLCA	VPS13B	-17.2748	0.680594	3.98478	0.716438	0.0137887	0.344976	11	102
BLCA	ARID1A	-34.1006	0.0235381	-4.24672	0.259589	0.0280381	0.676371	29	84
HNSC	FAT3	-14.4327	0.563695	7.47953	0.704529	0.0142772	0.840257	12	140
HNSC	PCLO	-15.5124	0.209557	1.31351	0.564165	0.00755936	0.646092	21	131
HNSC	DCHS2	-18.0804	0.19072	6.78229	0.954633	0.00755936	0.536133	11	141
HNSC	BAGE2	-16.0343	0.0713776	-5.4956	0.197293	-0.0145241	0.947334	26	126
HNSC	LAMA2	4.81342	0.647625	-6.41203	0.636978	-0.0281752	0.621148	10	142
HNSC	PIK3CA	-6.49892	0.519089	-3.34394	0.801429	-0.0184772	0.992703	31	121
HNSC	FLG	-20.5085	0.0862646	-6.52067	0.0288629	-0.0247402	0.569733	24	128
HNSC	RP1	-8.16453	0.258192	-6.35925	0.540829	0.0134859	0.754363	11	141
HNSC	FAM135B	-0.35503	0.94582	-6.08923	0.524566	-0.00102888	0.970431	15	137
HNSC	PLEC	-0.997057	0.828811	1.02606	0.795271	0.00727125	0.590938	15	137
HNSC	CTNNA2	-16.0983	0.282861	-11.3435	0.159027	0.0276545	0.979248	10	142
HNSC	CDH10	-0.0583815	0.77189	1.92567	0.542869	0.00551417	0.577181	14	138
HNSC	USH2A	-15.5124	0.384495	0.541112	0.436918	-0.0186508	0.593587	13	139
HNSC	NEB	12.1018	0.832255	1.28665	0.908291	0.00357097	0.84969	10	142
HNSC	DNAH7	-3.74934	0.709347	-18.3583	0.0119518	-0.0709609	0.0669796	14	138
HNSC	SYNE1	-4.20218	0.914837	0.987208	0.380538	-0.00297713	0.892251	28	124
HNSC	DNAH3	-0.596116	0.838058	12.9335	0.194675	0.121592	0.154673	10	142
HNSC	CSMD1	3.60926	0.501585	13.8006	0.277013	0.0553389	0.663692	13	139
HNSC	NAV3	-30.8676	0.116051	-9.95e-14	0.555039	0.013774	0.393471	11	141
HNSC	CDH19	13.2229	0.491796	12.1256	0.197245	0.0290415	0.94963	10	142
HNSC	PCDH11X	-24.36	0.0588598	-6.85708	0.261023	0.0450511	0.877818	12	140
HNSC	PCDH15	-24.8685	0.0125126	-14.3913	0.0362404	-0.0102037	0.36529	12	140
HNSC	ZFHX4	-11.8419	0.253952	-1.12089	0.636978	-0.0154794	0.740855	10	142
HNSC	LRP1B	-4.38147	0.648407	-6.30393	0.200554	-0.0381218	0.503547	30	122
HNSC	KALRN	14.9543	0.471003	9.72614	0.434013	-0.0160497	0.975471	12	140
HNSC	EP300	31.7654	0.0961604	2.83143	0.57296	-0.102441	0.310271	12	140
HNSC	CUBN	-24.1807	0.343982	-12.6813	0.0494839	-0.0281374	0.291128	12	140
HNSC	PRDM9	-18.8925	0.263351	-2.38569	0.554628	0.0232581	0.61591	10	142
HNSC	SI	-19.8731	0.0249242	1.97857	0.660929	0.0910497	0.287964	15	137
HNSC	FAT1	17.5785	0.102719	-5.43822	0.213034	-0.0641658	0.0599236	26	126
HNSC	GPR98	-18.8777	0.190417	0.643915	0.835952	-0.0149877	0.438848	14	138
HNSC	MACF1	-0.69976	0.74552	-1.61724	0.31354	-0.0205994	0.591705	12	140
HNSC	UNC13C	-8.16453	0.716852	-9.01389	0.381752	-0.0247884	0.754363	11	141
HNSC	DNAH9	-13.0843	0.439974	-4.03736	0.194508	-0.0185461	0.41127	15	137
HNSC	TP53	-21.3607	0.00182727	-3.14145	0.419763	0.0396042	0.078054	95	57
HNSC	OR6C65	-2.12049	0.549659	6.92455	0.505949	0.0330529	0.724076	10	142
HNSC	CSMD3	-12.9123	0.412734	-3.93443	0.690745	0.00393029	0.873225	38	114
HNSC	RIMS2	-11.5915	0.343347	-1.8503	0.94963	0.0603121	0.610691	10	142
HNSC	CREBBP	21.7075	0.0880769	-7.10162	0.146239	-0.0996918	0.0104581	10	142
HNSC	FAT4	12.2309	0.370681	3.40266	0.916273	-0.0208361	0.572836	14	138
HNSC	VPS13B	-17.7291	0.179769	7.79239	0.411516	0.135177	0.29985	10	142
HNSC	NSD1	-29.6315	0.050383	5.01946	0.751825	0.0923798	0.168532	13	139
HNSC	NOTCH1	10.1412	0.22461	-7.45425	0.0557439	-0.0646511	0.0286187	28	124
HNSC	CDKN2A	-10.794	0.371423	-2.71066	0.395814	-0.00131699	0.893346	33	119
HNSC	CLSTN2	4.62904	0.979248	-1.65441	0.3587	-0.0056591	0.579798	10	142
HNSC	PTPRT	-7.4073	0.61658	1.20513	0.910824	-0.0122349	0.792143	13	139
HNSC	CASP8	40.2413	0.00143533	-6.28115	0.246806	-0.128089	0.00762667	12	140
HNSC	TTN	-1.35565	0.789893	-0.254083	0.463719	-0.013774	0.519627	69	83
HNSC	FAT2	12.4041	0.14687	-9.90474	0.463894	-0.0831928	0.0655058	11	141
HNSC	PKHD1L1	-29.3095	0.0233727	-3.77768	0.524566	-0.00518707	0.451028	15	137
HNSC	PAPPA2	-7.01935	0.685448	-2.77406	0.428651	-0.0552783	0.0967057	10	142
HNSC	RELN	28.5224	0.1049	6.53018	0.255406	-0.0604284	0.41658	14	138
HNSC	LAMA1	-26.5332	0.503847	-14.5372	0.229446	0.00727125	0.633755	11	141
HNSC	CNTNAP2	-29.3095	0.0946974	1.76731	0.776068	0.176668	0.295866	11	141
HNSC	RYR2	8.89038	0.300373	0.247913	0.873592	0.00326524	0.775511	16	136
HNSC	THSD7A	-13.8601	0.112576	-1.8503	0.735248	0.066336	0.199839	10	142
HNSC	DNAH5	-16.6842	0.416589	-3.77768	0.765546	-0.0247884	0.845099	23	129
HNSC	ABCA13	-10.0079	0.820677	-4.64139	0.890643	0.0818205	0.979248	10	142
HNSC	XIRP2	-11.4598	0.171991	5.32196	0.73898	0.10014	0.265416	16	136
HNSC	COL11A1	-30.3266	0.0539641	1.97857	0.886904	0.0907616	0.14687	11	141
HNSC	LRP2	-19.1069	0.109097	7.50287	0.190717	0.123001	0.0199902	12	140
HNSC	HUWE1	0.449977	0.329943	6.78229	0.389541	0.0471743	0.249318	11	141
HNSC	MUC16	-8.16453	0.22212	-4.16531	0.0503338	-0.0185461	0.647477	31	121
HNSC	ASPM	-11.2833	0.218611	11.5028	0.52217	0.0262539	0.381752	11	141
HNSC	HERC1	-6.17955	0.961471	-12.8936	0.0556553	-0.0937258	0.0788064	10	142
HNSC	DST	-3.67798	0.817356	0.513031	0.742996	0.00608444	0.821789	18	134
HNSC	SCN1A	-5.6041	0.583994	-10.1118	0.163382	-0.0769782	0.279743	11	141
KIRC	PBRM1	-2.87e-05	0.988973	-0.792763	0.7928	-0.0101936	0.708855	13	28
KIRC	VHL	-1.23897	0.863687	-3.73937	0.170618	0.00287071	0.38934	16	25
LUAD	GUCY2F	-10.34	0.496594	-3.93734	0.412486	0.0233805	1	14	218
LUAD	HYDIN	-22.3924	0.15572	12.8492	0.0458336	0.119071	0.00355758	25	207
LUAD	CCNB3	-51.734	0.00621483	-3.44904	0.984143	0.158734	0.0163706	12	220
LUAD	SUPT6H	11.7725	0.792704	-1.04601	0.397652	0.107117	0.0691367	12	220
LUAD	HUWE1	8.90786	0.270812	6.92747	0.368095	0.0287919	0.792925	21	211
LUAD	PCDHA1	20.8772	0.635438	5.33458	0.785957	-0.00446862	0.886538	11	221
LUAD	PXDNL	5.03351	0.639255	2.50885	0.708269	0.0192932	0.878678	36	196
LUAD	NRG3	-58.9981	0.0119486	-0.776731	0.888378	0.131978	0.0278836	13	219
LUAD	ROBO3	-20.7794	0.517589	5.10667	0.415127	0.0778589	0.0963251	12	220
LUAD	COL6A6	-47.5285	0.0220325	9.65086	0.0978398	0.123703	0.00195576	17	215
LUAD	DIDO1	-29.8464	0.145081	-5.89067	0.405487	0.0631518	0.33898	18	214
LUAD	MDGA2	-7.68494	0.290997	-1.19697	0.447347	0.0645459	0.0922222	19	213
LUAD	PYHIN1	-45.8753	0.216665	-3.59157	0.555172	0.0173382	0.363921	10	222
LUAD	ARHGEF6	9.38419	0.229625	8.76589	0.402196	-0.0122828	0.453102	11	221
LUAD	WDR49	-5.87872	0.629324	6.35708	0.965596	0.0678137	0.367224	14	218
LUAD	TRO	6.2017	0.481292	25.0727	0.0414469	0.133528	0.175986	11	221
LUAD	OR8I2	-28.3774	0.7334	3.28587	0.57443	0.0887202	0.16733	11	221
LUAD	TRPM6	-0.0435409	0.606305	-3.68588	0.365333	0.016615	0.952287	16	216
LUAD	CNBD1	-7.72552	0.635193	20.0494	0.0259035	0.167916	0.00767686	10	222
LUAD	TRIML1	-12.8187	0.692617	6.89984	0.330101	0.10313	0.0447018	12	220
LUAD	LCT	-12.5473	0.440955	-1.52007	0.697153	0.0392233	0.0612879	26	206
LUAD	GBP6	-2.71326	0.470201	17.8597	0.204142	0.178915	0.0894566	12	220
LUAD	NPY5R	-34.9758	0.0499042	9.46786	0.315665	0.0912605	0.0191389	11	221
LUAD	PKHD1	11.3545	0.137799	9.7607	0.176102	-0.0119432	0.954232	35	197
LUAD	ABCG8	1.53565	0.841569	5.3177	0.940488	0.0112124	0.535965	10	222
LUAD	COL1A2	-25.7018	0.139707	6.53623	0.715955	0.0669153	0.154628	19	213
LUAD	OR52A5	9.43458	0.705856	3.54172	0.948621	-0.040116	0.59978	11	221
LUAD	HDX	-24.469	0.486434	4.92325	0.856665	-0.0174689	0.936656	10	222
LUAD	MTUS2	-0.744305	0.975422	1.50308	0.861405	0.0528357	0.358558	14	218
LUAD	IFI16	-1.75502	0.770744	-2.7261	0.618122	0.0136546	0.607977	10	222
LUAD	GALNT8	-4.15491	0.251757	7.52748	0.322371	0.0625724	0.12309	11	221
LUAD	STAB2	-33.2039	0.0577807	2.51402	0.973824	0.047193	0.178519	16	216
LUAD	NUP210L	-13.1815	0.30032	1.46368	0.494986	0.119597	0.0349414	12	220
LUAD	BRAF	-30.6585	0.0250307	-12.3846	0.118404	0.00122647	0.443511	16	216
LUAD	UGT2B4	-48.5363	0.00498974	-2.6063	0.970627	0.122436	0.0323311	11	221
LUAD	CSMD2	-28.1945	0.0029822	6.03179	0.481186	0.120295	0.00306008	38	194
LUAD	WNK1	26.0641	0.618122	-4.21319	0.902248	0.0292114	0.845338	10	222
LUAD	SETD2	-20.7495	0.396076	6.63102	0.373212	0.0341529	0.246524	20	212
LUAD	SRGAP3	-27.6556	0.124955	-0.922268	0.655808	0.0777787	0.504431	14	218
LUAD	FCRL5	-2.82102	0.864634	4.27759	0.193549	0.0848972	0.0418039	14	218
LUAD	PGBD1	-52.547	0.0338477	-7.15852	0.609415	0.0588709	0.0704677	11	221
LUAD	ST8SIA6	-35.8303	0.0278953	-6.69059	0.759718	0.0726237	0.0923007	10	222
LUAD	UTRN	-25.6763	0.259545	0.0322708	0.808608	0.0540291	0.189458	20	212
LUAD	HS3ST5	-41.5084	0.0139383	-1.11957	0.453873	0.0674753	0.222088	10	222
LUAD	DSCAML1	-16.9446	0.836378	-4.73795	0.576968	0.00851836	0.900159	16	216
LUAD	COL4A5	-42.1944	0.0108089	-0.894758	0.707379	0.0659407	0.0745788	17	215
LUAD	TRHDE	-7.07861	0.805908	-0.863254	0.808608	0.00136392	0.710507	20	212
LUAD	CXorf22	-19.7392	0.110721	-2.1137	0.717707	0.0586557	0.184506	13	219
LUAD	AMPH	30.0929	0.0514174	15.2657	0.0411961	-0.0214031	0.371762	13	219
LUAD	LAMA3	-49.735	0.0947594	-6.86986	0.224315	0.00403344	0.513373	11	221
LUAD	GRID1	-33.3599	0.0415132	17.37	0.0572437	0.233042	0.000449505	12	220
LUAD	ARHGAP36	-16.6405	0.419025	-2.1137	0.828275	0.0292248	0.441398	13	219
LUAD	PLEKHG4B	10.6856	0.798525	12.8492	0.0575101	0.0234729	0.284697	17	215
LUAD	PAPPA2	-25.0547	0.254676	10.2375	0.00269544	0.102975	3.73e-05	44	188
LUAD	LAMA4	-26.851	0.396281	16.4908	0.23923	0.10331	0.0855856	14	218
LUAD	BRIP1	23.9311	0.115453	14.8588	0.0947594	0.0136794	0.775359	11	221
LUAD	COL6A3	-12.462	0.486628	6.39926	0.273285	0.0846205	0.022515	36	196
LUAD	IGF2R	-30.6287	0.121067	-0.949777	0.525827	0.0205941	0.581081	17	215
LUAD	KCNJ12	-24.717	0.434928	18.7395	0.0658633	0.113951	0.00613905	17	215
LUAD	EPHA3	-17.3161	0.582845	10.9389	0.0834209	0.0795112	0.0822372	22	210
LUAD	ARMC3	-41.0326	0.00200019	-4.1197	0.050552	0.0221979	0.553474	16	216
LUAD	CLEC16A	-39.3346	0.0282398	4.18248	0.955827	0.124283	0.0469415	10	222
LUAD	HECW1	-30.1581	0.1417	9.58875	0.328048	0.111032	0.0124004	24	208
LUAD	PCDHGA4	-9.66629	0.644398	2.12652	0.738779	0.00968798	0.422753	12	220
LUAD	ZNF236	-24.5569	0.343704	12.792	0.315194	0.0887709	0.0296199	14	218
LUAD	HK3	-2.13037	0.470201	3.99548	0.762231	0.0883586	0.107412	12	220
LUAD	FREM1	-22.5206	0.361729	10.7088	0.304461	0.145974	0.0511725	12	220
LUAD	TG	-23.6587	0.0369909	6.80187	0.572685	0.0711577	0.0315552	30	202
LUAD	ASXL2	-31.7307	0.395258	-3.45997	0.462629	0.0660796	0.74145	10	222
LUAD	ALPK1	57.7073	0.0984535	11.1401	0.384341	0.0124769	0.635438	11	221
LUAD	CDH12	-4.86901	0.871566	5.51392	0.739518	0.0232881	0.599816	27	205
LUAD	TNN	-22.4477	0.050044	1.9215	0.720322	0.0500927	0.0442711	35	197
LUAD	TYR	-36.6396	0.0284108	1.33575	0.552785	-0.0216884	0.617702	14	218
LUAD	OR2T3	-15.9367	0.197492	1.34688	0.881662	0.0376924	0.135468	13	219
LUAD	OR6F1	12.6254	0.139979	4.1408	0.77893	-0.0518362	0.285719	13	219
LUAD	ASTN1	-5.82229	0.416884	3.87925	0.10198	0.0527643	0.00641945	40	192
LUAD	OR4C6	-17.9525	0.409998	21.984	0.016073	0.206158	0.00257131	11	221
LUAD	ENPP3	-26.1352	0.840725	4.38235	0.844181	-0.031556	0.802935	12	220
LUAD	MYT1L	-26.828	0.134419	12.931	0.398019	0.0786735	0.0659959	20	212
LUAD	HEPHL1	-19.5078	0.695623	-10.1234	0.220824	0.00177455	0.893813	11	221
LUAD	SLITRK5	-39.7692	0.00324191	-14.612	0.0261569	-0.0156456	0.682865	12	220
LUAD	ITPR2	-45.5485	0.0426979	-2.26196	0.423794	0.079399	0.0463929	20	212
LUAD	CCDC108	-7.55576	0.735448	11.9013	0.132599	0.115312	0.046615	12	220
LUAD	NLRP5	-9.82023	0.467948	-7.90454	0.134302	-0.04782	0.523431	18	214
LUAD	TMPRSS15	-2.34551	0.982382	-1.31529	0.974833	0.0376924	0.967287	25	207
LUAD	DCHS2	1.54433	0.924663	-1.01308	0.902887	0.0109853	0.647271	27	205
LUAD	TUBA3C	-17.5114	0.647569	-9.25335	0.114332	-0.0682397	0.268547	12	220
LUAD	SYT9	2.49798	0.191148	12.4528	0.386862	0.00795375	0.872017	11	221
LUAD	OR14A16	-22.1937	0.566609	18.8205	0.232734	0.0571213	0.148759	14	218
LUAD	VAV3	-10.1022	0.553474	4.27759	0.432114	0.0554373	0.0440969	16	216
LUAD	GRIN2A	-8.03248	0.155178	-0.776731	0.849996	0.0431775	0.225895	27	205
LUAD	HELZ	17.6634	0.586237	2.92376	0.775262	-0.0600408	0.311252	14	218
LUAD	SGCZ	-2.37129	0.944321	2.05728	0.607977	-0.0244006	0.737813	10	222
LUAD	PCDHGA6	9.68116	0.795627	9.19642	0.144229	0.0516702	0.309023	17	215
LUAD	RLTPR	1.35516	0.792934	8.0141	0.238937	0.112108	0.246709	10	222
LUAD	VPS13B	-15.5725	0.829492	0.25771	0.775285	0.0067284	0.82429	22	210
LUAD	COL19A1	7.8792	0.51848	-0.776731	0.759001	-0.0112757	0.532439	19	213
LUAD	EGFR	5.70249	0.835256	-6.6954	0.510545	-0.0188446	0.803456	21	211
LUAD	ZIC4	-5.79748	0.93443	18.317	0.0224006	0.0745632	0.0551298	18	214
LUAD	MAGEC2	-19.7048	0.334506	21.83	0.0658256	0.142775	0.034562	12	220
LUAD	IGDCC4	-28.1661	0.594744	12.8992	0.0474721	0.060049	0.0886192	14	218
LUAD	NRXN1	-8.38874	0.28489	14.9769	0.013429	0.100954	0.00123237	41	191
LUAD	ATP1A2	9.19504	0.510886	16.0003	0.0303846	0.102612	0.0877352	10	222
LUAD	ALK	0.126426	0.527085	9.77158	0.349907	0.0376924	0.240621	15	217
LUAD	GRIN3A	-4.96169	0.640721	4.49117	0.250599	0.0448906	0.215411	26	206
LUAD	BRWD3	-37.9866	0.0738981	6.34087	0.602483	0.069802	0.135921	19	213
LUAD	ZFC3H1	-5.10126	0.682065	14.9999	0.513373	-0.0135346	0.622368	11	221
LUAD	GCNT2	9.43458	0.364446	-0.732688	0.641648	-0.0529033	0.312329	15	217
LUAD	PLCB4	-55.707	0.197471	16.1552	0.762417	0.0410183	0.281047	15	217
LUAD	SLITRK2	12.7371	0.621983	4.6941	0.710648	0.0202737	0.496924	24	208
LUAD	MICAL3	-1.63141	0.981639	4.1832	0.926654	-0.053817	0.857539	11	221
LUAD	CNOT1	0.618595	0.860448	12.1851	0.190977	0.0395286	0.348852	10	222
LUAD	RBM19	6.2017	0.938975	1.73182	0.325855	0.100103	0.215831	13	219
LUAD	OR4C3	11.1079	0.403534	5.87582	0.529687	-0.023662	0.892419	15	217
LUAD	USH2A	7.87503	0.91828	4.8492	0.293427	0.0369663	0.0912553	81	151
LUAD	ZNF578	21.8667	0.573336	2.63677	0.779118	-0.0116487	0.927854	12	220
LUAD	MUC2	-8.54871	0.520388	13.816	0.318329	0.0115895	0.296382	16	216
LUAD	ZNF208	-37.0994	0.0197037	3.92666	0.867327	0.040361	0.0661216	21	211
LUAD	KCNU1	-45.471	0.0693258	-1.52007	0.952287	0.0628444	0.10872	16	216
LUAD	STAG2	-36.3668	0.0287922	18.6933	0.0315949	0.350991	0.00189076	11	221
LUAD	BRCA2	8.49112	0.69787	6.68852	0.311252	-0.021463	0.583414	14	218
LUAD	USP29	-17.7825	0.289797	9.76614	0.179021	0.0857398	0.0752556	18	214
LUAD	A2ML1	46.8762	0.00566552	8.8089	0.377702	-0.0583104	0.0883406	17	215
LUAD	THSD7A	-18.3285	0.72621	9.10759	0.16608	0.0753237	0.0902517	25	207
LUAD	UHRF1BP1L	-5.78677	0.523348	-0.108743	0.734183	0.0527126	0.517097	10	222
LUAD	WRN	-14.2034	0.45941	9.22532	0.371104	0.0763708	0.154323	12	220
LUAD	REG1A	-13.0181	0.785957	-6.75154	0.191148	0.0319189	0.57443	11	221
LUAD	ZNF99	7.70448	0.837919	8.8089	0.54169	0.0705935	0.331228	21	211
LUAD	MYOF	27.115	0.187729	14.3554	0.121497	-0.0215304	0.921345	10	222
LUAD	TBX22	-15.9367	0.641648	-0.894758	0.958759	0.0642466	0.478921	15	217
LUAD	OR5D14	-7.68494	0.70459	15.1034	0.0620932	0.11066	0.090464	17	215
LUAD	TAS1R2	-28.9712	0.0537849	-2.09036	0.192716	0.0151709	0.555757	11	221
LUAD	HTR1A	-23.7601	0.0806623	1.63153	0.509051	0.0789036	0.196384	12	220
LUAD	PCDHGB1	-7.68494	0.345059	12.0858	0.531823	0.10445	0.309381	13	219
LUAD	FER1L6	-17.5132	0.208842	-0.0500902	0.760337	0.0440557	0.387996	27	205
LUAD	USP34	-29.8512	0.071883	13.1796	0.415127	0.0853556	0.0320032	12	220
LUAD	NF1	-23.0224	0.445829	17.8093	0.143073	0.0582464	0.119743	18	214
LUAD	CNTNAP4	-0.591556	0.582845	5.01168	0.361156	0.0231855	0.722153	22	210
LUAD	ACAN	-18.405	0.0839413	4.49311	0.72862	0.0345876	0.212362	23	209
LUAD	FSIP2	-32.3302	0.143073	9.20252	0.185008	0.178123	0.00772671	18	214
LUAD	CD163L1	-19.6522	0.9923	10.6782	0.73844	0.0123781	0.897103	16	216
LUAD	NUP205	-4.91523	0.41766	12.1777	0.385445	0.109556	0.0664771	12	220
LUAD	HERC1	-18.3213	0.293466	-0.83146	0.705031	0.0286945	0.689301	13	219
LUAD	KIF21B	-5.39379	0.792704	8.87211	0.190335	0.0648312	0.127006	12	220
LUAD	REV3L	9.38419	0.53742	9.7607	0.137709	0.0586557	0.34289	13	219
LUAD	FAM47A	-2.4246	0.463562	5.69648	0.441006	0.0753237	0.0571222	21	211
LUAD	ZEB2	-34.8107	0.0101597	-0.499934	0.720916	0.0751076	0.028491	20	212
LUAD	PLA2R1	-15.7553	0.188042	-8.64445	0.347748	0.0562023	0.675324	11	221
LUAD	TRPM3	-48.5393	0.0152222	-7.63847	0.237403	0.0221979	0.251726	12	220
LUAD	ANKFN1	-47.5419	0.291866	-6.86986	0.602984	0.0405088	0.602984	11	221
LUAD	DACH1	-10.4955	0.284133	1.50308	0.806353	0.120573	0.082988	12	220
LUAD	OR2M5	-1.10954	0.392515	6.17023	0.609004	0.0495673	0.19527	16	216
LUAD	LRFN5	-9.98355	0.407818	5.05637	0.760399	0.0683418	0.48034	20	212
LUAD	OR5D16	-47.6172	0.0346815	6.11635	0.545526	0.193461	0.00406501	10	222
LUAD	SLC44A5	-3.1243	0.924345	15.9675	0.218664	0.0442845	0.395192	12	220
LUAD	ELTD1	-57.8378	0.00104515	8.05879	0.96063	0.158532	0.00279694	18	214
LUAD	ZNF804A	-7.53698	0.235275	-5.76438	0.195132	0.0253116	0.459215	48	184
LUAD	TDRD5	-33.4552	0.430986	-4.9328	0.936656	0.0615999	0.235117	10	222
LUAD	NOBOX	-12.2822	0.487043	3.1817	0.974297	0.0828618	0.359691	11	221
LUAD	TNS1	-40.2534	0.223823	9.28852	0.301354	0.0878922	0.0465346	13	219
LUAD	VPS13C	47.9476	0.0798906	18.9664	0.00332159	0.0874171	0.111609	20	212
LUAD	KIF16B	-34.9056	0.0502385	-4.1197	0.214879	0.00235096	0.745092	10	222
LUAD	ATRNL1	-19.6704	0.0604501	-0.83146	0.726307	0.112699	0.0199662	15	217
LUAD	ATP8A2	-53.2021	0.0379331	-0.949777	0.461847	0.0124769	0.237048	13	219
LUAD	MYH6	-47.2974	0.1165	9.58136	0.527765	0.110037	0.0978735	19	213
LUAD	RIF1	16.614	0.197806	4.05493	0.352143	0.00948027	0.867866	14	218
LUAD	POTEG	-14.436	0.401298	9.71416	0.0632247	0.123703	0.0170028	15	217
LUAD	OTOA	-24.717	0.384341	6.34087	0.549599	0.0642466	0.235024	11	221
LUAD	PDE10A	-6.37503	0.311246	5.05739	0.267314	0.0831204	0.0956723	11	221
LUAD	PCSK5	-18.0741	0.181519	-9.52074	0.296217	0.0218381	0.966531	12	220
LUAD	TLL2	19.3413	0.545526	26.7418	0.166126	0.139977	0.0593381	10	222
LUAD	FLG2	-13.5774	0.125792	3.74598	0.649688	0.0667109	0.0862979	37	195
LUAD	HMCN1	-16.805	0.0756748	-1.97276	0.93218	0.0752036	0.0157807	36	196
LUAD	NLRP14	-9.72961	0.618658	-2.39566	0.546215	0.0430477	0.761566	21	211
LUAD	IL1RAPL1	-24.0538	0.354796	-6.26041	0.483885	0.0160525	0.582391	12	220
LUAD	UBA6	12.6138	0.349205	12.1933	0.401119	0.00851836	0.732622	16	216
LUAD	DGKB	-25.6707	0.0462332	-0.776731	0.398334	0.0828618	0.132256	17	215
LUAD	NLRP12	-34.9853	0.0655195	-9.23415	0.176237	-0.0302964	0.7144	15	217
LUAD	SLIT3	-39.417	0.0221839	1.34688	0.379357	0.0853285	0.101248	15	217
LUAD	CD5L	-47.5285	0.0937827	18.1264	0.0529633	0.251889	0.00011055	13	219
LUAD	MC5R	12.457	0.878307	0.553348	0.808444	0.0194769	0.92545	13	219
LUAD	SCN9A	4.22071	0.638631	15.0578	0.097055	0.157785	0.110336	10	222
LUAD	ABCC4	-9.27011	0.312942	3.77474	0.71612	0.0499124	0.173616	10	222
LUAD	TMTC1	-17.7012	0.716002	3.84734	0.374899	0.0109853	0.201334	29	203
LUAD	PCDHB7	-11.1562	0.31646	-3.25719	0.973824	0.0456003	0.466813	16	216
LUAD	DPYS	12.4027	0.427882	6.68658	0.357098	-0.0287468	0.910325	12	220
LUAD	XIRP2	-6.83501	0.457354	5.93258	0.0488888	0.0374135	0.0115486	72	160
LUAD	CNTLN	-5.7147	0.218462	-2.98893	0.551948	0.0185761	0.408782	10	222
LUAD	ADAMTS18	-19.1022	0.457331	5.05739	0.494488	0.0831204	0.17658	17	215
LUAD	OR51V1	-34.5204	0.0608004	0.213788	0.987666	0.056899	0.0620259	12	220
LUAD	RIMBP2	-40.3706	0.0484998	16.98	0.394637	0.125323	0.00886135	15	217
LUAD	CACNA2D1	-7.47151	0.239765	-5.31721	0.342687	0.0428208	0.409628	18	214
LUAD	CEP152	-22.5398	0.215375	-2.72408	0.475649	0.0298765	0.906824	12	220
LUAD	ADAM12	-8.69893	0.699028	9.28852	0.516344	0.0878922	0.37684	11	221
LUAD	COL21A1	1.86214	0.456734	14.4507	0.0911356	-0.00587301	0.523323	12	220
LUAD	TMPRSS11A	15.2422	0.628341	8.35763	0.436644	-0.0103359	0.74145	10	222
LUAD	MYH7	-3.1243	0.26161	2.42626	0.883806	0.0337236	0.252177	24	208
LUAD	ABCC12	-33.3183	0.389392	14.924	0.246089	0.177558	0.0198587	11	221
LUAD	HFM1	-12.8911	0.698042	8.50921	0.258835	0.0559251	0.154871	16	216
LUAD	MET	-14.3374	0.935592	-14.8639	0.0211525	-0.0937314	0.0226236	13	219
LUAD	BNC1	2.6379	0.662911	9.79912	0.348852	0.0464349	0.341468	10	222
LUAD	PCDHB11	-28.9506	0.23134	4.54028	0.621521	-0.00155191	0.371605	10	222
LUAD	DCLK1	-19.0354	0.34289	6.90515	0.515212	0.0615526	0.201966	13	219
LUAD	KCNB1	-30.1005	0.332299	-7.01725	0.558393	0.05144	0.619264	12	220
LUAD	BCORL1	-34.0221	0.086009	1.73182	0.16174	0.112144	0.00513422	11	221
LUAD	OR51D1	-19.4061	0.513987	12.5132	0.139871	0.112417	0.0574161	10	222
LUAD	CROCC	-36.3292	0.231415	-8.84439	0.807272	0.140409	0.0567085	11	221
LUAD	DNAH10	-7.68494	0.256945	14.924	0.400434	0.0864076	0.138143	17	215
LUAD	DZIP3	-10.0458	0.497782	5.6052	0.294179	0.0979354	0.0658256	12	220
LUAD	NCOA6	-20.4287	0.376784	-0.499934	0.436644	0.0673988	0.374189	10	222
LUAD	KEAP1	4.69753	0.409566	11.138	0.00320586	0.085656	0.000111132	48	184
LUAD	GABRG3	-1.39093	0.414268	2.42626	0.921345	0.0202737	0.477431	10	222
LUAD	CHL1	-15.6631	0.083387	5.04103	0.490779	0.130203	0.0138563	16	216
LUAD	NBAS	-14.7716	0.244185	6.84348	0.266487	0.114454	0.0229825	14	218
LUAD	KIF2B	-36.6753	0.219756	6.90515	0.24439	0.0753237	0.0441466	25	207
LUAD	ABL2	7.8792	0.450335	1.34688	0.904743	-0.0524709	0.475579	11	221
LUAD	CPNE4	-30.6287	0.170179	-7.3877	0.195879	0.0205941	0.886538	11	221
LUAD	CIT	-28.3087	0.666409	9.3165	0.439489	0.129737	0.10715	10	222
LUAD	LAMB4	11.5024	0.331887	3.50564	0.67119	0.0261669	0.911943	19	213
LUAD	BCHE	-22.8006	0.138381	10.0753	0.41766	0.0868328	0.0501287	12	220
LUAD	SYNPO2	-25.6707	0.187961	-10.0051	0.511613	0.0535082	0.521901	15	217
LUAD	TIMD4	-15.4483	0.734183	-1.15631	0.84911	0.048782	0.959665	10	222
LUAD	USP9X	-23.3302	0.475579	-5.51692	0.255586	-0.0135346	0.740342	11	221
LUAD	TKTL2	0.269284	0.890545	4.73879	0.784718	-0.000145216	0.643981	14	218
LUAD	BACH2	-65.4822	0.00110696	-6.62187	0.30032	0.0940887	0.042404	12	220
LUAD	KIAA1211	-15.492	0.403881	10.9283	0.0416391	0.161044	0.00351304	20	212
LUAD	MYPN	-39.9749	0.023861	-8.76299	0.0947901	-0.0112757	0.711434	15	217
LUAD	NLGN1	-6.97084	0.596777	18.7395	0.0371293	0.112699	0.0393533	15	217
LUAD	BIRC6	-18.6666	0.771978	6.76452	0.474024	0.0109853	0.326164	21	211
LUAD	ATP10B	6.2017	0.568723	6.35689	0.222208	-0.040116	0.592023	13	219
LUAD	CACNA1A	0.759665	0.921345	-0.534128	0.807823	-0.0153996	0.852886	10	222
LUAD	MORC1	19.4817	0.698214	10.1557	0.462629	0.0233805	0.5846	10	222
LUAD	COL1A1	-8.61965	0.680475	14.0265	0.131046	-0.00247647	0.561649	10	222
LUAD	PCDHB10	-45.1406	0.0197409	5.83772	0.713129	0.0519885	0.0601945	14	218
LUAD	ITGAM	-28.0232	0.0868535	1.34688	0.705856	0.0625724	0.30253	11	221
LUAD	TRIO	-20.9164	0.310811	-1.01308	0.64698	0.0878922	0.181436	17	215
LUAD	CNTN1	-38.2754	0.17866	-0.732688	0.391907	0.0109853	0.836083	19	213
LUAD	PTPRC	2.49798	0.354023	6.07296	0.331762	-0.0135346	0.917629	15	217
LUAD	GTF3C1	-6.97084	0.859958	19.0812	0.0278271	0.0862301	0.0375627	17	215
LUAD	KIF13A	-8.20411	0.433809	-0.648719	0.662911	0.123611	0.0491186	10	222
LUAD	OR2T27	10.9396	0.952286	-1.31529	0.872017	0.0560795	0.944956	11	221
LUAD	SLC8A1	-3.6564	0.800931	7.00682	0.271284	0.0480426	0.309345	24	208
LUAD	SATB2	8.589	0.291467	9.81397	0.326209	-0.00820589	0.867864	18	214
LUAD	TPR	-53.2482	0.0101809	-11.3018	0.163858	0.10193	0.113389	15	217
LUAD	NLRP8	-12.3941	0.650747	7.1877	0.425313	0.11573	0.0732893	12	220
LUAD	CDH11	-3.05883	0.375235	12.4436	0.594708	0.0754255	0.186223	18	214
LUAD	FOLH1B	-33.3279	0.28937	13.5648	0.0810832	0.0917137	0.025304	19	213
LUAD	BTAF1	-39.417	0.0880927	3.54172	0.676813	0.0472762	0.0811897	13	219
LUAD	RALGAPB	-27.3609	0.464265	-0.83146	0.879272	0.0913888	0.0929545	11	221
LUAD	CHRDL1	-34.6123	0.128606	-5.85684	0.5846	0.083417	0.341468	10	222
LUAD	SLITRK4	-31.5015	0.19782	-1.87775	0.692421	0.0521836	0.290163	20	212
LUAD	SPTA1	1.54433	0.726592	5.51392	0.927768	-0.00403344	0.824068	67	165
LUAD	LILRB2	43.996	0.501642	-1.8024	0.745092	-0.0519209	0.489456	10	222
LUAD	L1CAM	-23.4514	0.0192743	5.97194	0.894991	0.0912605	0.01855	19	213
LUAD	SCN3A	-5.53	0.340839	-1.31529	0.704173	0.0317223	0.340839	23	209
LUAD	CTNNA3	-24.717	0.266959	9.77158	0.193091	0.0964473	0.03913	13	219
LUAD	SERPINB3	-15.186	0.27906	-7.95691	0.460898	0.0229689	0.649884	14	218
LUAD	TCHH	12.0498	0.643776	3.39576	0.742252	0.04201	0.449505	22	210
LUAD	MYH1	-24.717	0.154704	4.49311	0.571142	0.0862512	0.0341027	31	201
LUAD	XYLT1	-1.63141	0.878086	9.59613	0.21709	0.0436869	0.28937	19	213
LUAD	KCNC2	-17.8421	0.31646	6.23359	0.909333	0.00266981	0.715259	16	216
LUAD	FANCM	-29.0915	0.107643	-2.72461	0.595048	0.0234729	0.275005	19	213
LUAD	EFCAB6	-2.19419	0.695623	-7.45586	0.197475	-0.0214031	0.417889	11	221
LUAD	TRRAP	-32.7215	0.0211402	2.52555	0.833	0.106607	0.0240282	20	212
LUAD	RYR2	-10.9266	0.0440636	6.17773	0.192146	0.0868736	0.000415386	91	141
LUAD	GPR98	-6.82803	0.766383	0.777433	0.722645	0.0335938	0.359129	24	208
LUAD	ZEB1	-8.70693	0.165242	4.87189	0.919904	0.0495401	0.288135	18	214
LUAD	RGS22	-10.8643	0.387934	15.1793	0.268136	-0.0338515	0.724197	17	215
LUAD	DGKK	0.126426	0.871603	6.44684	0.594966	-0.0214031	0.91532	13	219
LUAD	BRDT	-3.77926	0.520297	9.93699	0.111427	0.13583	0.00559219	14	218
LUAD	EGFLAM	-34.9758	0.161719	9.95092	0.315493	0.0654591	0.128913	13	219
LUAD	TLR4	-4.15491	0.534512	-0.0500902	0.747151	-0.00446862	0.891776	29	203
LUAD	PCDHB14	24.9988	0.306063	7.40544	0.397941	0.068407	0.917522	10	222
LUAD	RET	-32.3414	0.139871	-0.465232	0.492487	0.0660264	0.216665	10	222
LUAD	ABCA6	15.1754	0.806354	10.1298	0.0934802	-0.00861652	0.255592	16	216
LUAD	CYLC1	-20.9338	0.109266	-3.71761	0.535965	0.0491931	0.366471	10	222
LUAD	ASAP1	14.8224	0.549519	10.2351	0.395192	-0.00693238	0.546577	12	220
LUAD	OR8J3	-43.0279	0.00613905	-11.0791	0.133223	0.0445821	0.142178	17	215
LUAD	IRS4	-22.739	0.13374	-1.52007	0.984143	0.096077	0.0154086	12	220
LUAD	PREX1	-10.6482	0.587558	-2.96125	0.579607	0.0331148	0.753052	16	216
LUAD	ABCA4	-8.54871	0.822781	-0.331527	0.822781	-5.85e-05	0.951991	10	222
LUAD	BAIAP3	-6.37503	0.685445	3.1207	0.352495	0.0109853	0.615876	11	221
LUAD	DCHS1	-42.8536	0.0144608	4.94964	0.670601	0.137185	0.0103266	13	219
LUAD	MLLT10	-18.6666	0.658586	-0.0500902	0.577571	0.107144	0.112296	11	221
LUAD	OR4K5	-19.6704	0.247969	-11.3122	0.16174	-0.00446862	0.977968	11	221
LUAD	LAMA2	-37.5909	0.0315159	-5.8164	0.340318	0.0454577	0.148013	26	206
LUAD	FAM47C	-27.3702	0.119134	9.77158	0.642834	0.0545858	0.138152	25	207
LUAD	SACS	2.94884	0.767752	-2.80282	0.619856	0.0101982	0.672509	16	216
LUAD	OR10G8	19.3807	0.472737	8.24462	0.531329	0.0234292	0.472737	11	221
LUAD	ANKS1B	14.2881	0.431371	6.18019	0.428885	-0.0587275	0.114577	13	219
LUAD	IGSF1	-28.5099	0.256227	0.572457	0.805051	0.0220668	0.479231	18	214
LUAD	TSHR	-26.396	0.190335	7.77665	0.402599	0.168563	0.0725834	12	220
LUAD	CDH9	7.8792	0.38392	-4.61669	0.534287	0.0319189	0.363586	25	207
LUAD	AEBP1	18.2939	0.83491	-0.83146	0.955906	0.0588709	0.411718	13	219
LUAD	RB1	25.3055	0.442662	-3.03545	0.392432	-0.074527	0.213119	15	217
LUAD	SEMA3D	-35.3248	0.443511	-0.782074	0.955362	-0.0134142	0.87272	16	216
LUAD	CDHR2	4.62158	0.857539	-5.51692	0.996328	-0.0493438	0.839508	11	221
LUAD	USP26	-13.7322	0.537385	-6.75154	0.716142	0.0560795	0.846711	11	221
LUAD	TTK	-20.2023	0.712707	-1.19697	0.7334	0.0825295	0.309051	11	221
LUAD	HSPG2	9.68116	0.665261	18.7395	0.165919	0.109812	0.253666	11	221
LUAD	STK11	0.126426	0.933991	3.90834	0.430601	0.016348	0.722334	37	195
LUAD	LAMA1	-6.37503	0.748749	6.90515	0.355348	0.00403344	0.537778	27	205
LUAD	SPEF2	-51.9787	0.00021485	-6.96247	0.237372	0.0767431	0.0278416	28	204
LUAD	NRCAM	6.1995	0.635173	11.0895	0.513869	0.00446862	0.619992	19	213
LUAD	FHL5	-6.93227	0.564901	-2.80958	0.202671	-0.0408951	0.495529	10	222
LUAD	PCDHB4	-1.10954	0.682163	2.03685	0.805908	0.0178498	0.538462	20	212
LUAD	PARD3B	5.39211	0.673704	4.1408	0.708193	0.0557691	0.330062	13	219
LUAD	OR4C15	-38.0877	0.228535	11.3644	0.208964	0.087541	0.0240282	20	212
LUAD	OR5D13	-4.15491	0.807272	-1.19697	0.442093	0.0205941	0.568173	11	221
LUAD	LILRA2	-53.5147	0.00700777	-9.20819	0.175813	0.0469596	0.171623	12	220
LUAD	NELL1	-18.5489	0.465644	6.72581	0.583079	0.0288356	0.301599	21	211
LUAD	FGB	-38.9826	0.0531322	-8.57239	0.65942	0.0350669	0.169093	10	222
LUAD	DCDC1	-27.0452	0.318942	9.20147	0.320566	0.100369	0.0675498	22	210
LUAD	KIAA1755	-52.8819	0.00375399	2.82319	0.858178	0.0814133	0.0125761	14	218
LUAD	SLCO1B1	-19.5145	0.513987	5.63291	0.917522	0.0490139	0.523348	10	222
LUAD	UMOD	-14.7716	0.597907	28.694	0.170591	0.189891	0.0126824	10	222
LUAD	ENTHD1	0.126426	0.359691	-0.83146	0.719583	0.0587736	0.184972	11	221
LUAD	NEB	-30.0768	0.0279827	6.39041	0.675188	0.0354649	0.147628	34	198
LUAD	NCAM2	16.4279	0.356336	6.15727	0.551948	-0.0477638	0.611351	10	222
LUAD	POLR3B	-5.87872	0.571431	2.85554	0.990393	0.0435807	0.548732	10	222
LUAD	SLC9A9	12.457	0.510411	16.5516	0.0206021	0.0890763	0.108193	11	221
LUAD	ABCC11	-17.5978	0.278218	5.50936	0.334506	0.056899	0.122665	12	220
LUAD	KALRN	-6.82803	0.196605	-3.53237	0.268732	0.0241335	0.647347	16	216
LUAD	MAP2	-4.00322	0.736627	3.39576	0.446347	-0.0320293	0.99861	20	212
LUAD	THOC2	-11.5784	0.441398	-2.1137	0.597915	-0.00177455	0.586157	13	219
LUAD	PCDH19	-34.937	0.233214	-5.51692	0.504515	-0.0196911	0.82873	11	221
LUAD	GRM3	21.2747	0.591236	10.7681	0.294823	-0.0298154	0.826531	10	222
LUAD	RAPGEF2	-36.0044	0.0544136	-9.07573	0.375847	0.057195	0.190335	12	220
LUAD	OR5W2	-5.05437	0.993213	1.35722	0.821652	0.0319189	0.529036	13	219
LUAD	CCDC129	-10.8643	0.219003	5.97194	0.983033	0.088827	0.117539	13	219
LUAD	AGBL1	9.68116	0.941293	13.3817	0.111259	0.200603	0.0291304	11	221
LUAD	MYH3	-8.70597	0.759718	7.57792	0.465569	0.0445531	0.439489	10	222
LUAD	ARHGEF12	0.126426	0.17757	10.1133	0.108831	0.0376924	0.615751	13	219
LUAD	RTTN	-33.6568	0.0586916	2.37715	0.71612	0.0904551	0.0390279	10	222
LUAD	OR2T34	-51.7413	0.0368925	12.1789	0.188844	0.164513	0.0133	12	220
LUAD	HIVEP2	-13.5965	0.513987	-14.9916	0.0246451	0.0334586	0.539142	10	222
LUAD	MUC5B	7.8792	0.481746	-8.75265	0.38392	-0.0541497	0.229387	25	207
LUAD	WDR72	6.77019	0.971183	9.29024	0.4597	0.0541429	0.504713	10	222
LUAD	CWH43	7.8792	1	14.9999	0.433937	-0.0218539	0.565056	11	221
LUAD	PCDHGA5	3.91545	0.659494	-2.35639	0.397281	-0.0382401	0.686178	18	214
LUAD	FGD5	-52.2892	0.0330625	7.36892	0.520218	0.135824	0.0123425	10	222
LUAD	RYR1	-12.7946	0.290189	-2.32293	0.942925	0.0689186	0.198916	36	196
LUAD	CEP164	9.40939	0.959665	21.4095	0.169093	0.0810573	0.192617	10	222
LUAD	GALNT14	-5.38387	0.898435	2.78472	0.631763	0.0537266	0.450975	10	222
LUAD	ST6GAL2	-32.7523	0.0173175	-10.448	0.252249	0.0992614	0.129386	17	215
LUAD	OR5T3	-26.5153	0.323563	14.2425	0.270462	0.109718	0.0740009	12	220
LUAD	LILRB1	-25.2094	0.184522	2.82389	0.698214	0.0763151	0.591236	10	222
LUAD	FAM179B	-0.428432	0.920838	-2.6306	0.70242	0.0981099	0.312857	12	220
LUAD	TTN	-12.5838	0.0816477	4.28167	0.468345	0.0710809	0.00459866	127	105
LUAD	DCC	-38.2987	0.0078111	11.6332	0.0700152	0.260513	0.000166949	18	214
LUAD	ROS1	22.3869	0.190977	19.8512	0.211338	0.00907911	0.928998	10	222
LUAD	RP1L1	-31.8709	0.0355527	1.9215	0.726403	0.0310065	0.317602	43	189
LUAD	ATP2B3	6.86746	0.694833	11.9726	0.25948	-0.0404731	0.499199	14	218
LUAD	RPGRIP1L	-6.36965	0.809774	10.3191	0.8511	-0.0441067	0.980619	12	220
LUAD	DGKI	-0.38457	0.741355	5.10352	0.267064	0.0778177	0.192621	16	216
LUAD	GPR112	-4.65997	0.491744	5.9354	0.364061	0.0684972	0.0356008	40	192
LUAD	SCN2A	10.3104	0.96671	12.366	0.0534211	0.100795	0.00442256	22	210
LUAD	RANBP2	-34.7094	0.347236	-5.86785	0.772413	-0.023662	0.864909	13	219
LUAD	RUNX1T1	-40.5738	0.00851057	-2.50098	0.26122	0.0644198	0.137542	14	218
LUAD	SEMA5A	-19.7392	0.30559	-0.614371	0.726162	0.081635	0.256037	23	209
LUAD	LGR5	-38.4378	0.0783316	-6.12581	0.520218	0.0150391	0.392586	10	222
LUAD	NRK	-8.07838	0.934876	-1.94539	0.728801	-0.0388007	0.500587	12	220
LUAD	PCDHA9	25.206	0.129822	30.281	0.00704181	0.164955	0.0381234	10	222
LUAD	CACNA1B	-4.00322	0.583414	6.35103	0.501811	0.0615999	0.273623	14	218
LUAD	GLI1	-25.1527	0.680475	18.1914	0.0502385	0.182014	0.00472943	10	222
LUAD	NCAM1	-28.9768	0.0362364	3.1207	0.963288	0.137185	0.139544	11	221
LUAD	LRFN2	-5.05437	0.435604	9.59613	0.200252	0.0921953	0.0353585	15	217
LUAD	PCDHGA8	-29.8512	0.155605	1.22244	0.837273	0.101241	0.0393554	12	220
LUAD	DMD	-17.0892	0.176177	13.561	0.114874	0.109604	0.00355373	33	199
LUAD	POTEF	-8.69893	0.366553	6.90515	0.341766	0.0468005	0.290019	15	217
LUAD	BNC2	-36.6999	0.0355161	0.467712	0.730558	0.0386524	0.110336	10	222
LUAD	SPAG16	0.126426	0.955953	9.38663	0.648624	0.0531004	0.439364	11	221
LUAD	NCOR2	-33.652	0.0128467	-8.89859	0.17481	0.00814595	0.672509	16	216
LUAD	LYST	-24.0256	0.0360199	5.69648	0.662556	0.0205941	0.497489	21	211
LUAD	SCN1A	-27.7697	0.0629779	5.05342	0.432849	0.0614974	0.0314076	18	214
LUAD	SNRNP200	35.6309	0.128783	-4.50242	0.857539	-0.0584553	0.177461	11	221
LUAD	ZSWIM2	-17.9525	0.510411	-14.8632	0.0929545	-0.0671784	0.525309	11	221
LUAD	AHNAK2	7.70448	0.814121	4.22256	0.497377	0.0486896	0.247328	37	195
LUAD	DLC1	-49.735	0.0612867	-0.614371	0.782195	0.0588709	0.214257	13	219
LUAD	LPA	-12.451	0.67813	6.91631	0.29991	0.0572975	0.0995029	18	214
LUAD	NCAPD3	-32.1382	0.343918	-5.66017	0.468519	-0.0416649	0.925171	10	222
LUAD	ATP7A	-17.3108	0.705357	-3.66196	0.145115	-0.0399392	0.324632	10	222
LUAD	PLEC	-5.81536	0.932121	9.02599	0.0649653	0.0921953	0.0187609	25	207
LUAD	FLT3	-47.2974	0.0131052	3.50564	0.716142	0.163237	0.00906015	11	221
LUAD	GPR128	12.3589	0.636849	12.7945	0.114577	-0.0112757	0.301354	13	219
LUAD	OR2M3	11.7585	0.961079	6.53623	0.430525	0.0861584	0.168315	17	215
LUAD	CNTN3	1.19257	0.729718	10.8563	0.33161	-0.00247647	0.729718	16	216
LUAD	ITGAL	-26.6053	0.399071	1.73182	0.867319	0.0426527	0.553392	15	217
LUAD	ATP13A5	18.2939	0.803709	4.4019	0.528315	0.174081	0.320125	11	221
LUAD	EYS	-37.8699	0.0123352	2.34189	0.948352	0.112144	0.0262262	21	211
LUAD	TPO	-42.8801	0.0110618	7.77665	0.566609	0.138751	0.0220122	14	218
LUAD	SEMA6D	1.58787	0.864987	9.52925	0.289797	0.0243388	0.44365	18	214
LUAD	GPR139	16.7265	0.271079	10.6681	0.216665	-0.00247647	0.875609	10	222
LUAD	OR6N2	-4.93957	0.348852	9.66842	0.65942	0.0883364	0.158882	10	222
LUAD	CCKBR	-20.2494	0.13374	13.6441	0.0740009	0.133412	0.00373581	12	220
LUAD	OR4M1	-27.3909	0.376784	1.8473	0.712526	0.0966545	0.058051	10	222
LUAD	CRB1	-23.7124	0.127997	3.50564	0.326116	0.0845637	0.00225874	23	209
LUAD	OLFM3	21.1086	0.861154	6.35689	0.977968	-0.00177455	0.685445	11	221
LUAD	ZNF107	43.0374	0.172098	10.167	0.371605	-0.0390586	0.471479	10	222
LUAD	HCFC1	7.72385	0.433048	-3.56798	0.529088	-0.0431861	0.185888	12	220
LUAD	HEATR5B	15.1754	0.885858	0.723564	0.212121	0.00223637	0.462095	12	220
LUAD	ANK1	4.62158	0.98368	3.28587	0.486747	0.0614422	0.152174	21	211
LUAD	EXPH5	-7.28103	0.62777	1.34688	0.945744	0.0570226	0.520719	13	219
LUAD	OR4D6	-13.7322	0.330062	16.8006	0.53742	0.0562023	0.283804	13	219
LUAD	SPTBN4	-65.2748	0.00738849	-10.197	0.0645382	0.0427136	0.43046	12	220
LUAD	ZNF804B	-9.34239	0.457844	1.74216	0.400903	0.00403344	0.822142	29	203
LUAD	ANKRD30A	-6.24409	0.399618	5.73101	0.290592	-0.034599	0.932121	25	207
LUAD	PCDH10	9.43458	0.810656	3.67081	0.218534	-0.00446862	0.303335	29	203
LUAD	DUOX2	7.56438	0.756053	16.6772	0.49858	0.0530735	0.294823	10	222
LUAD	TNRC6A	-42.691	0.156052	1.08923	0.74874	0.0545169	0.315258	10	222
LUAD	MYO16	-18.9841	0.461604	-2.08622	0.839918	0.0351216	0.147792	22	210
LUAD	RIMS2	-12.9621	0.193068	1.54452	0.649026	0.0553784	0.0700058	46	186
LUAD	ACTRT1	-25.8482	0.477431	6.09281	0.971183	0.0640485	0.397941	10	222
LUAD	RBP3	-24.066	0.194858	-4.40394	0.573336	-0.0103359	0.628639	12	220
LUAD	USP7	-35.1114	0.699028	14.924	0.263364	0.0516599	0.109207	11	221
LUAD	PCDHB5	-31.5118	0.0584095	8.42276	0.306546	0.141404	0.0157872	12	220
LUAD	HDAC4	0.126426	0.36454	9.77158	0.423199	0.0436869	0.354883	11	221
LUAD	GABRA5	-12.39	0.612555	5.21915	0.296513	0.0798903	0.118875	18	214
LUAD	KCNH5	-52.0438	0.00293734	7.61319	0.680475	0.198996	0.000836945	10	222
LUAD	GABRA4	-50.6887	0.0258343	2.17834	0.676813	0.0857485	0.0367675	13	219
LUAD	OR8H1	8.04983	0.71972	13.1263	0.0390279	0.0648312	0.080811	10	222
LUAD	FBLN1	16.3738	0.549519	0.285075	0.534886	-0.00439552	0.30864	12	220
LUAD	FMN2	4.62158	0.924663	15.2657	0.0355786	0.119447	0.00109888	27	205
LUAD	MGAM	-12.083	0.453254	12.5495	0.124308	0.0973246	0.0484075	24	208
LUAD	RELN	-9.34239	0.542208	3.50564	0.683228	0.0302363	0.310142	39	193
LUAD	PCDHA4	3.4273	0.779118	10.7333	0.359409	0.0628217	0.341185	12	220
LUAD	PTPRU	-53.9059	0.126482	18.7395	0.0938535	0.163719	0.0026106	11	221
LUAD	CHRND	-7.90511	0.975024	-6.00197	0.532796	-0.0433713	0.564901	10	222
LUAD	OR2G3	-21.3408	0.294959	1.74216	0.586236	0.0528315	0.0434317	17	215
LUAD	RALGAPA2	-8.05232	0.495529	4.40859	0.730558	0.0171367	0.614733	10	222
LUAD	DLGAP2	7.87282	0.745462	11.486	0.103798	0.101684	0.03854	19	213
LUAD	MACF1	8.33123	0.834701	6.15727	0.620026	0.0059524	0.829492	22	210
LUAD	CD163	-26.1352	0.873622	22.6886	0.00957938	0.137601	0.0118183	18	214
LUAD	KLHL38	-27.6884	0.0705108	-4.20146	0.57471	0.104873	0.220269	10	222
LUAD	CLCA2	-28.4022	0.134774	3.77474	0.998078	0.0839325	0.0799776	10	222
LUAD	F9	-44.5531	0.00691726	-3.41049	0.456686	0.0614422	0.157929	13	219
LUAD	USP28	-20.9164	0.324627	7.26917	0.287672	0.177558	0.0526513	11	221
LUAD	OGDHL	20.5571	0.805202	15.2983	0.990479	0.00177455	0.889275	15	217
LUAD	PAK7	11.7725	0.73973	14.0954	0.0776376	-0.00247647	0.216076	22	210
LUAD	CALD1	-5.33485	0.998078	-4.32909	0.551948	-0.0140653	0.770744	10	222
LUAD	CTNND2	-32.2551	0.00538758	-2.17224	0.457551	0.055735	0.0727158	22	210
LUAD	FREM2	7.8792	0.720345	12.6321	0.329785	0.069802	0.149883	15	217
LUAD	NOVA1	-52.3882	0.00378194	-6.86986	0.732286	0.105298	0.00778829	15	217
LUAD	EPHB1	1.38897	0.663399	-0.499934	0.768836	0.0548156	0.404555	24	208
LUAD	CASS4	-1.63141	0.799051	18.2969	0.232742	0.088827	0.0871862	15	217
LUAD	PCDHB12	5.04932	0.887299	17.2825	0.0137899	0.104505	0.0167179	14	218
LUAD	POTEA	-20.6928	0.219025	-2.91713	0.920786	0.0587736	0.201653	15	217
LUAD	PCDHA5	-10.0458	0.354796	3.84126	0.68936	0.0304865	0.364059	12	220
LUAD	WDFY3	14.134	0.557748	12.0659	0.105826	0.0609347	0.114405	24	208
LUAD	ROR2	-20.9829	0.531983	-7.90454	0.22875	-0.0668892	0.558393	12	220
LUAD	SV2C	1.54433	0.733662	-0.435031	0.918695	0.0124769	0.714531	13	219
LUAD	MAGI2	-18.6666	0.91532	8.86949	0.416581	0.0560795	0.2615	13	219
LUAD	ATP1A4	-31.8437	0.081193	6.66367	0.499199	0.0838841	0.0308731	14	218
LUAD	PCDH11X	-25.2442	0.0233363	4.106	0.673652	0.0494691	0.0946259	39	193
LUAD	LAMB1	5.53025	0.495644	5.97189	0.78708	-0.0434217	0.566429	20	212
LUAD	RLF	-17.2245	0.483423	-1.81542	0.673428	-0.0703809	0.414268	10	222
LUAD	ACSM2B	4.62158	0.664412	9.46786	0.287642	0.0852236	0.360483	13	219
LUAD	SMARCA4	-5.57282	0.680027	7.02485	0.37682	0.0205941	0.67763	23	209
LUAD	COL12A1	-42.664	0.000757758	-5.2792	0.318606	0.0997869	0.0244486	24	208
LUAD	PDHA2	-4.71217	0.49565	3.84442	0.394655	0.0389176	0.0988824	16	216
LUAD	NRAP	-17.9525	0.321686	4.49311	0.943142	0.0234729	0.455062	17	215
LUAD	ABCA5	-34.7094	0.347748	5.88256	0.868393	0.0535082	0.768316	11	221
LUAD	ZAN	-2.0583	0.674357	10.1182	0.0396411	0.0651072	0.0604339	26	206
LUAD	ROBO2	-16.709	0.132623	-3.03545	0.363343	-0.0127644	0.968368	27	205
LUAD	LRRN2	7.8792	0.850317	-0.732688	0.552674	0.0124769	0.963288	11	221
LUAD	PCDH7	-10.8643	0.962684	3.75586	0.5601	0.0801932	0.477525	13	219
LUAD	BPTF	-7.68494	0.625624	10.6827	0.467079	0.176775	0.219093	11	221
LUAD	MED12L	-5.26497	0.692337	4.77191	0.291058	0.0900504	0.152643	16	216
LUAD	LTBP1	0.126426	0.721481	6.35689	0.21622	0.0259568	0.168993	25	207
LUAD	NAALAD2	-2.33239	0.925171	12.4566	0.0161341	0.133895	0.0525425	10	222
LUAD	PTPN13	-17.5359	0.273181	-7.1408	0.0727868	-0.0201837	0.723327	10	222
LUAD	CENPE	11.3545	0.205899	8.94523	0.187961	-0.0291101	0.687866	15	217
LUAD	OR5T1	-59.0899	0.223917	14.0288	0.25667	0.139353	0.0413693	10	222
LUAD	CYP11B2	-2.26985	0.948935	7.81725	0.345684	-0.000217589	0.352504	12	220
LUAD	SRRM2	8.68586	0.185888	27.7728	0.0461303	0.0653082	0.268547	12	220
LUAD	SELP	14.74	0.77841	0.840865	0.419549	-0.010226	0.620598	14	218
LUAD	SLC26A7	-33.8107	0.0361012	-7.3129	0.276265	-0.0260815	0.673166	12	220
LUAD	CNTN4	-19.0354	0.712707	8.76589	0.423199	0.0759562	0.338376	11	221
LUAD	SLC6A5	5.39211	0.857539	22.0387	0.00634404	0.12822	0.0100835	11	221
LUAD	NAV3	-25.836	0.0198347	-0.83146	0.769995	0.0615958	0.0132994	49	183
LUAD	SERPINA9	-32.3254	0.0775191	10.7393	0.294823	0.205351	0.033461	10	222
LUAD	ADAM23	-29.8688	0.110721	-9.83326	0.0442433	-0.0461838	0.323765	13	219
LUAD	SRCAP	-27.7853	0.210322	8.03963	0.137729	0.148399	0.0247817	16	216
LUAD	MSH4	3.1265	0.655936	-9.7489	0.27742	-0.0120798	0.691098	10	222
LUAD	ANO4	-28.3028	0.0614372	-6.75133	0.561253	0.0779341	0.0652833	16	216
LUAD	OR4A15	9.43458	0.8809	7.06751	0.0922222	0.0615526	0.191671	19	213
LUAD	EPPK1	-28.0251	0.483885	2.64194	0.79611	0.0160994	0.345684	12	220
LUAD	MAGEA12	-36.3494	0.0184541	6.02709	0.666729	0.0936292	0.13374	12	220
LUAD	DPP6	-2.19419	0.762417	3.56664	0.977786	0.0277262	0.299181	15	217
LUAD	NPY2R	-5.76847	0.82873	-0.83146	0.955953	-0.00446862	0.699028	11	221
LUAD	EFCAB5	55.8447	0.0537273	13.032	0.348852	-0.062741	0.214879	10	222
LUAD	ABCA13	-8.21061	0.319667	9.12613	0.0110416	0.120658	0.000532536	38	194
LUAD	PDZD2	-6.60747	0.920838	7.59589	0.514735	0.104537	0.144355	12	220
LUAD	GBA3	-15.2226	0.718576	9.01686	0.329073	0.0261669	0.208567	17	215
LUAD	ADCY2	11.3545	0.917629	-1.19697	0.583054	-0.0105055	0.667489	15	217
LUAD	PLG	-48.3171	0.372921	-2.23201	0.501431	0.0215053	0.873582	15	217
LUAD	SAGE1	-37.3218	0.0424796	-1.66815	0.871603	0.0878922	0.0929522	13	219
LUAD	NLRP4	-19.1292	0.192621	14.9642	0.0166049	0.207611	0.00108395	16	216
LUAD	UNC5B	11.1861	0.808444	-3.14751	0.851549	-0.0439249	0.792011	13	219
LUAD	SYTL2	-44.5222	0.0826969	3.83762	0.394484	0.0194769	0.814409	11	221
LUAD	CCDC132	4.2439	0.967343	10.7008	0.240864	0.0844345	0.0980289	10	222
LUAD	INPP4B	13.3387	0.569394	5.65783	0.378239	0.0868728	0.190749	14	218
LUAD	DNAI2	-47.9573	0.0296546	-11.9833	0.0237363	0.00511481	0.917522	10	222
LUAD	ZNF638	-15.9367	0.868255	-4.49837	0.724075	-0.0442657	0.765912	13	219
LUAD	SCN10A	-16.1405	0.503005	8.79393	0.532992	0.0788995	0.097314	16	216
LUAD	ZNF292	-47.5285	0.0327047	3.1207	0.996328	0.104817	0.07715	11	221
LUAD	VWF	-18.3213	0.628889	13.8414	0.00824192	0.111662	0.0354247	11	221
LUAD	KIF19	-4.32007	0.806353	1.04445	0.955971	-0.0253262	0.917332	12	220
LUAD	ITIH2	-6.93227	0.892839	-5.82009	0.395192	0.00847275	0.96301	12	220
LUAD	RAD51AP2	-19.372	0.431238	1.35722	0.49283	-0.0112757	0.981639	11	221
LUAD	NEK10	-5.10126	0.625624	3.1207	0.7334	0.0864076	0.450335	11	221
LUAD	KIAA1109	-32.3282	0.00832056	-0.0500902	0.611466	0.0917137	0.0450002	21	211
LUAD	APC	-24.5914	0.489419	-0.119845	0.899827	0.0936171	0.278218	12	220
LUAD	ALPK2	-6.37503	0.649679	6.90515	0.149457	0.0617576	0.0876418	17	215
LUAD	COL5A3	-34.6111	0.264743	11.8968	0.34343	0.122316	0.0853679	12	220
LUAD	COL7A1	6.54829	0.937338	-0.379146	0.49759	0.0160994	0.577103	18	214
LUAD	HTR1E	16.6828	0.397652	15.6672	0.282152	0.0507618	0.440863	12	220
LUAD	PHF14	-8.54981	0.37939	6.85381	0.928998	0.0160007	0.807823	10	222
LUAD	KCNH1	-21.7779	0.319722	3.1316	0.731377	0.0301121	0.23534	20	212
LUAD	ARID2	11.3545	0.62777	26.5775	0.0636807	0.110485	0.112636	13	219
LUAD	GPC6	-25.7093	0.132599	12.1065	0.425313	0.114343	0.0511725	12	220
LUAD	FNDC1	-5.66093	0.37189	-6.11496	0.489932	0.0241994	0.638724	11	221
LUAD	GLDC	-17.9525	0.933971	6.53623	0.273314	0.0864076	0.208913	11	221
LUAD	VCAM1	-14.436	0.125663	7.52748	0.670386	0.0496111	0.134749	15	217
LUAD	FYB	-12.1627	0.133242	-2.78351	0.558295	0.0396838	0.350021	14	218
LUAD	ZP4	-20.2023	0.909115	1.34688	0.974387	-0.00713726	0.740068	19	213
LUAD	GLG1	-41.5846	0.0309573	8.65148	0.695879	0.151225	0.0171778	12	220
LUAD	CARD6	-21.6819	0.209583	8.09683	0.571431	0.0760694	0.25066	10	222
LUAD	KIF1B	0.126426	0.940155	25.0786	0.0770557	0.0499448	0.121067	17	215
LUAD	MKI67	-4.15491	0.420115	6.03818	0.475555	0.0531004	0.175228	19	213
LUAD	NLRC5	84.466	0.0153028	6.68852	0.308345	-0.0161558	0.723327	10	222
LUAD	ADCY1	7.8792	0.897454	-0.83146	0.688831	0.0205941	0.568173	11	221
LUAD	MDN1	-61.8699	0.0111629	-11.5535	0.19401	0.0908838	0.130337	17	215
LUAD	LRRC66	6.1995	0.839508	9.28852	0.15362	0.0964473	0.0298171	11	221
LUAD	DNAH2	-0.24208	0.747096	4.34939	0.858178	0.0168467	0.670714	14	218
LUAD	ARHGAP25	29.2594	0.319252	-2.70233	0.998238	-0.00619863	0.742115	12	220
LUAD	ZDBF2	0.126426	0.729318	12.9125	0.0635929	0.180445	0.0362568	19	213
LUAD	CDH23	-5.76847	0.802808	5.67628	0.246297	0.0109853	0.348135	19	213
LUAD	PLXNB2	-12.3673	0.970052	22.0117	0.0372936	0.0381635	0.212121	12	220
LUAD	NLRP3	-22.62	0.5874	7.06751	0.163204	0.069802	0.0458336	25	207
LUAD	TET1	-23.2991	0.624756	5.88256	0.419025	0.119603	0.383256	13	219
LUAD	PTPRB	-43.1765	0.0247701	8.00906	0.929622	0.0831295	0.0585323	14	218
LUAD	PDE6A	-24.2734	0.0334521	5.69648	0.219003	0.152304	0.00235747	13	219
LUAD	TAF1L	8.56953	0.944591	11.4989	0.0432599	0.074389	0.0307577	32	200
LUAD	SORCS3	-32.3254	0.107872	3.91289	0.321809	0.0639099	0.0816531	26	206
LUAD	KCNH8	-7.72137	0.275064	-1.08429	0.893827	0.0748814	0.20647	18	214
LUAD	FSHR	-21.5414	0.149348	-0.841155	0.939995	0.0556732	0.0614372	16	216
LUAD	ATP2B2	-36.7061	0.523348	-0.434491	0.74874	0.058123	0.149145	10	222
LUAD	KIR3DL1	11.5901	0.507008	-5.98617	0.289575	-0.0605972	0.0988911	13	219
LUAD	KIF5A	-7.68494	0.641648	4.56814	0.610646	0.0489761	0.566783	15	217
LUAD	FLNA	-12.2822	0.574507	5.69648	0.488136	0.0857485	0.208046	13	219
LUAD	AKAP9	-32.3302	0.118404	6.40186	0.99538	0.107751	0.226196	16	216
LUAD	DSG3	-26.8441	0.382701	5.60857	0.887299	0.083384	0.343704	14	218
LUAD	OR4K1	-6.97084	0.875643	17.8808	0.36454	0.0861584	0.200695	11	221
LUAD	MED13	-39.9836	0.106104	5.46222	0.971183	0.193642	0.0647258	10	222
LUAD	TBX15	-27.8634	0.641233	12.7879	0.0230588	0.136486	0.0225311	12	220
LUAD	ADCY10	25.5686	0.209491	-3.17419	0.483679	-0.0910804	0.116119	14	218
LUAD	PDGFRA	21.1086	0.348016	12.6321	0.253808	0.0535082	0.344173	17	215
LUAD	KANK4	-27.6798	0.143066	2.57156	0.910056	0.0245254	0.541846	14	218
LUAD	DCAF4L2	11.4284	0.988013	-1.70283	0.866103	-0.006391	0.762528	22	210
LUAD	TRPC7	-37.566	0.121497	9.24247	0.395258	0.0832921	0.0315086	10	222
LUAD	ST18	-3.77926	0.64693	8.34409	0.384945	0.0528344	0.0878528	14	218
LUAD	PCDHB6	11.0691	0.564347	3.76442	0.314979	0.00750412	0.924345	12	220
LUAD	OR10R2	-20.7899	0.091309	-4.62073	0.2615	-0.0112757	0.955906	13	219
LUAD	TMEM132E	-33.3279	0.345059	12.5321	0.212692	0.0862301	0.00657147	13	219
LUAD	CSNK1A1L	-21.0587	0.119197	-0.87516	0.535965	0.0271345	0.604612	10	222
LUAD	PCDHB8	-30.2487	0.101273	-7.61165	0.204754	0.0761106	0.396803	16	216
LUAD	SCN5A	19.9672	0.142162	9.25443	0.163858	0.0908919	0.362346	15	217
LUAD	PDE1C	-10.8643	0.566783	12.7114	0.0462777	0.0857485	0.0753952	15	217
LUAD	IGSF22	-12.8384	0.254655	-8.75922	0.513987	0.117467	0.121497	10	222
LUAD	LRP1B	-12.5467	0.21773	6.43312	0.105163	0.0667873	0.00231311	83	149
LUAD	NUP214	-30.3913	0.0616606	-16.052	0.0206021	0.00177455	0.814409	11	221
LUAD	LRP12	-20.3019	0.841569	12.7719	0.0404189	0.0567444	0.0502385	10	222
LUAD	SYT10	15.1601	0.273623	-2.82087	0.552785	-0.0607179	0.105995	14	218
LUAD	OR2L8	7.40288	0.573389	6.53623	0.296693	0.0831204	0.256945	17	215
LUAD	TRPV5	-11.8752	0.384945	4.82474	0.713129	0.0674753	0.313219	14	218
LUAD	DPY19L2	-32.3907	0.0668475	-12.4341	0.189348	0.144951	0.260731	10	222
LUAD	FAM83B	17.1646	0.519319	-5.51692	0.356092	-0.023662	0.362346	15	217
LUAD	NRG1	7.40288	0.988983	3.50564	0.537385	0.0625724	0.31345	11	221
LUAD	ABCA2	-19.4289	0.501642	18.1286	0.264837	0.226954	0.0113706	10	222
LUAD	ZC3H13	-6.97084	0.80186	12.5321	0.871603	-0.0338515	0.818345	13	219
LUAD	GPRC6A	-23.0909	0.158258	-12.8381	0.0230979	0.0304775	0.860572	16	216
LUAD	NLGN4X	17.2844	0.375986	-2.7646	0.853617	-0.0416649	0.873119	26	206
LUAD	POLQ	-46.7508	0.0173797	-1.50011	0.876504	0.0986306	0.0157292	18	214
LUAD	ADAMTS5	7.3769	0.646733	12.6529	0.152522	0.0385218	0.135329	20	212
LUAD	PGK2	4.02487	0.603776	9.88945	0.0626462	0.0357883	0.264743	12	220
LUAD	SLITRK1	-36.6849	0.218573	-1.57992	0.937138	0.0577071	0.0663528	25	207
LUAD	F13B	-36.5258	0.0335165	8.79472	0.486247	0.0996914	0.00580747	14	218
LUAD	SERPINB7	24.7905	0.137304	14.7695	0.0727868	0.0502664	0.315258	10	222
LUAD	POTEH	-7.38189	0.517886	-6.05056	0.622582	0.00325834	0.695188	16	216
LUAD	TMEM132D	-6.37503	0.823727	-0.435031	0.738281	-0.00446862	0.732286	15	217
LUAD	ADNP2	-33.3279	0.115453	-0.83146	0.897454	0.0732876	0.31789	11	221
LUAD	SHANK1	11.1861	0.639888	9.19642	0.543047	0.040361	0.0456064	13	219
LUAD	HRH2	-10.2491	0.571431	3.59199	0.5846	0.0403154	0.262778	10	222
LUAD	OR2M2	-13.9123	0.473934	1.17198	0.553474	0.0765245	0.181024	16	216
LUAD	RNF213	-29.0915	0.12178	-8.05867	0.056221	0.0562023	0.820632	15	217
LUAD	PIK3R4	-32.3254	0.15188	3.43869	0.712526	0.0842929	0.160312	10	222
LUAD	TRANK1	-24.0132	0.28559	4.94964	0.602984	0.105105	0.0549389	11	221
LUAD	2017-03-01	-24.7979	0.106451	7.54156	0.847639	0.077384	0.0626462	12	220
LUAD	MED13L	-5.66093	0.356033	3.1207	0.901835	0.0297547	0.307361	13	219
LUAD	PDPR	36.8491	0.16875	-0.0500902	0.747305	0.0383242	0.872017	11	221
LUAD	CTNNB1	25.0681	0.0566681	26.3249	0.00284908	0.0893765	0.253558	12	220
LUAD	ASTN2	-37.6967	0.0230829	-0.531583	0.985349	0.0902528	0.022882	22	210
LUAD	TTC21B	-5.45921	0.921345	13.9983	0.109266	0.141752	0.0428304	10	222
LUAD	TLL1	-5.66093	0.979037	16.4969	0.0411459	0.110519	0.0247835	17	215
LUAD	FRYL	-2.19419	0.765912	-2.99574	0.782195	0.00403344	0.792011	13	219
LUAD	ITGA4	-9.27011	0.582108	8.19039	0.353962	0.0319169	0.672784	18	214
LUAD	MYO7A	-7.68494	0.475579	2.34189	0.785957	0.0645459	0.31789	11	221
LUAD	PCDH17	-16.7541	0.142573	6.32017	0.486806	0.0806773	0.0169348	24	208
LUAD	ANK3	-14.436	0.5301	5.87582	0.213129	0.0630094	0.0292832	19	213
LUAD	CEP350	-6.3931	0.497782	-0.35683	0.806353	0.0646836	0.68611	12	220
LUAD	OR6N1	6.61975	0.712273	11.3432	0.201012	-0.0216238	0.470201	12	220
LUAD	SDK1	-24.717	0.14696	4.49311	0.397334	0.163237	0.0420481	13	219
LUAD	CYP26B1	11.9662	0.371605	14.5281	0.723327	0.0526845	0.906063	10	222
LUAD	GABRG1	-5.26497	0.603776	-4.32909	0.22875	-0.0525162	0.341185	12	220
LUAD	CNTNAP2	-22.7193	0.0673514	5.61791	0.24064	0.101157	0.000893966	30	202
LUAD	FHOD3	-8.20411	0.978866	6.82216	0.507794	0.0244711	0.604612	10	222
LUAD	MAGEC3	-7.68494	0.868255	-2.27734	0.369489	-0.0524709	0.256119	13	219
LUAD	ADAMTS17	-38.4636	0.0485665	-0.922268	0.898435	0.115059	0.0886334	10	222
LUAD	FLT4	-36.7583	0.18194	18.6059	0.112296	0.20746	0.00156631	11	221
LUAD	PRDM9	-6.67293	0.656626	8.89973	0.0986383	0.0597741	0.117127	30	202
LUAD	ADAMTS20	-22.8086	0.0792414	-0.584438	0.475752	-0.00549494	0.243385	28	204
LUAD	NALCN	-19.5507	0.187816	9.93699	0.218467	0.100869	0.00379344	36	196
LUAD	DSG1	-1.23065	0.899827	6.52219	0.619264	0.0356269	0.304461	12	220
LUAD	CSPG4	-6.24409	0.15764	-1.89769	0.315665	-0.043768	0.897454	11	221
LUAD	ABCB4	-14.2622	0.115811	8.4392	0.382007	0.098506	0.00962841	10	222
LUAD	SCML4	16.8449	0.875609	3.88214	0.948155	0.0110438	0.42537	10	222
LUAD	AFF2	-5.10126	0.795878	13.5648	0.0932889	0.0528315	0.205859	25	207
LUAD	RGS7	-11.5784	0.264922	3.80351	0.746028	0.17423	0.0314564	21	211
LUAD	SLITRK6	-33.7169	0.0167179	14.2056	0.0901683	0.193172	0.000104492	14	218
LUAD	OR4M2	-24.0209	0.0972126	2.7547	0.268547	0.150211	0.00480018	12	220
LUAD	TMPRSS11F	-36.9132	0.144355	10.1813	0.274321	0.0700671	0.0264556	12	220
LUAD	CHD6	-12.1638	0.671964	1.14462	0.636751	-0.0114331	0.827565	20	212
LUAD	CACNA2D4	-8.30024	0.486247	4.90124	0.661755	-0.0163993	0.682733	14	218
LUAD	REG1B	-28.075	0.200695	-3.11406	0.311246	-0.0477555	0.91569	11	221
LUAD	MYO3A	-31.432	0.053174	-4.22426	0.166318	0.0261232	0.914773	19	213
LUAD	SALL3	-11.5784	0.277366	-3.03545	0.66192	0.0614422	0.269304	11	221
LUAD	VWA3B	-19.5078	0.37684	3.50564	0.261404	0.0109853	0.150983	11	221
LUAD	CR2	-36.1536	0.173616	10.4504	0.571431	0.123663	0.258695	10	222
LUAD	PTPRT	-19.263	0.343243	-0.614371	0.853934	0.00177455	0.263464	21	211
LUAD	FBN3	6.1995	0.886133	-5.98617	0.708473	0.0205941	0.851697	15	217
LUAD	ABCC9	-13.5313	0.292031	5.55923	0.563831	0.0683829	0.170691	14	218
LUAD	DST	-28.2654	0.0102045	4.82223	0.448872	0.0965165	0.00876157	44	188
LUAD	WNK3	-20.9164	0.549599	8.38095	0.91569	0.0599037	0.723029	11	221
LUAD	LAMA5	-55.549	0.00210243	-1.77804	0.4597	0.108276	0.105067	10	222
LUAD	OR10Z1	-1.63141	0.942359	-0.614371	0.861565	-0.0524709	0.808444	13	219
LUAD	DMXL1	-14.0348	0.884898	-6.37374	0.221784	-0.030404	0.401119	16	216
LUAD	SMG1	-14.5193	0.284133	-5.07984	0.591513	0.0482816	0.22199	12	220
LUAD	PDE4DIP	-19.3705	0.284312	-0.83146	0.849996	0.0499448	0.361735	27	205
LUAD	GOLGB1	-47.8415	0.00629876	-4.10958	0.497782	0.0859737	0.210507	12	220
LUAD	COL11A2	-28.875	0.146449	1.96438	0.68755	0.0458783	0.384635	10	222
LUAD	SSPO	-31.8523	0.0132679	-0.655919	0.899725	0.0870373	0.0034652	44	188
LUAD	UNC5D	12.6894	0.882272	8.05879	0.254699	0.0611368	0.298208	18	214
LUAD	PRUNE2	-27.3702	0.127695	-1.58657	0.619255	0.0287919	0.316012	29	203
LUAD	UGT3A1	-15.6279	0.23113	-2.6306	0.468424	0.0676366	0.15944	14	218
LUAD	CHRM2	-29.3423	0.0199662	-2.09036	0.630298	0.0831204	0.148761	15	217
LUAD	SIPA1L1	6.54829	0.833824	14.8164	0.082988	0.0896545	0.0972126	12	220
LUAD	OR2T8	-0.331206	0.811556	15.6445	0.202671	0.113459	0.116931	10	222
LUAD	PDZRN4	19.3807	0.719583	14.924	0.279407	-0.00446862	0.420539	11	221
LUAD	EYA4	-17.3161	0.70242	6.63317	0.270462	0.0677003	0.12811	12	220
LUAD	COL14A1	-13.045	0.204562	-1.25944	0.472044	0.103198	0.00951785	28	204
LUAD	ZNF257	-16.6405	0.362111	3.1207	0.743821	0.0788429	0.131117	11	221
LUAD	BMS1	-24.818	0.254655	12.0602	0.240864	0.141786	0.00949458	10	222
LUAD	NRXN2	-8.14257	0.982708	-3.48581	0.74874	0.0104381	0.998078	10	222
LUAD	SLC26A3	-22.5206	0.283863	13.3758	0.513987	0.0700348	0.266906	10	222
LUAD	ABCA8	11.0994	0.748801	6.38636	0.970052	0.0754768	0.454067	12	220
LUAD	CORIN	-31.5983	0.272387	6.8046	0.70242	0.111346	0.0911356	12	220
LUAD	GBP4	22.1416	0.427882	1.54452	0.806353	0.000763761	0.99119	12	220
LUAD	UNC13C	9.1383	0.647161	4.90944	0.161865	0.0518939	0.345823	24	208
LUAD	KPRP	-17.5941	0.153742	3.1207	0.85701	0.0759562	0.12197	17	215
LUAD	RXFP1	12.4027	0.537797	0.330739	0.8615	-0.0291742	0.594568	12	220
LUAD	GALNTL6	-31.9118	0.68755	2.92015	0.504713	0.0501163	0.281704	10	222
LUAD	RICTOR	-39.1171	0.0662824	-1.01308	0.835912	0.0697683	0.07715	11	221
LUAD	LRP2	-17.5941	0.604236	3.50564	0.334796	0.0460642	0.317683	37	195
LUAD	FLT1	-46.8278	0.208913	-5.51692	0.50158	-0.0112757	0.91569	11	221
LUAD	EPB41L3	-37.9866	0.016287	-4.21392	0.185143	-0.0100239	0.663244	17	215
LUAD	DNAH11	-8.05232	0.265524	-1.52007	0.79739	0.0390528	0.108049	32	200
LUAD	COL4A2	10.6856	0.229643	19.243	0.143246	0.0837136	0.478921	15	217
LUAD	FAT1	24.0258	0.461669	7.07355	0.0820438	-0.00861652	0.336765	30	202
LUAD	SRGAP1	-24.3552	0.173011	-9.36404	0.188844	0.0245198	0.79952	12	220
LUAD	WBSCR17	-27.4467	0.262404	-1.41152	0.972289	0.0303772	0.164131	18	214
LUAD	CNKSR2	-24.7481	0.108831	-5.86785	0.818345	-0.0174322	0.586157	13	219
LUAD	GREB1	38.8867	0.160813	0.371423	0.775732	0.00318556	0.433048	12	220
LUAD	VEGFC	-11.6445	0.65246	12.0602	0.252652	0.192445	0.0255838	10	222
LUAD	CCT8L2	-29.0177	0.0972126	2.42626	0.768972	0.0766108	0.11232	12	220
LUAD	CDH18	1.10914	0.549141	4.61832	0.24582	0.0782621	0.0611773	28	204
LUAD	MARCO	-23.0085	0.230669	2.03176	0.582252	0.0643963	0.105358	16	216
LUAD	TRPM8	-32.4271	0.150508	7.63023	0.864234	0.0938004	0.141168	10	222
LUAD	PCDHA6	-19.7392	0.487043	1.34688	0.778887	0.0149073	0.785957	11	221
LUAD	ITGAD	-19.9668	0.321686	1.34688	0.798525	0.0292248	0.334684	17	215
LUAD	MYOCD	34.0543	0.0281152	20.2667	0.002958	-0.00861652	0.703959	14	218
LUAD	PROS1	-33.3279	0.0970813	6.35096	0.48505	0.125804	0.00786812	17	215
LUAD	USP31	-18.6666	0.839508	5.88256	0.642017	0.0440557	0.425869	11	221
LUAD	ZFYVE26	-33.2316	0.0215406	-14.2883	0.0498178	0.0227508	0.975422	14	218
LUAD	KDR	-17.8379	0.377942	9.59531	0.0990736	0.0870696	0.00856311	24	208
LUAD	UBR4	-52.8123	0.00155531	-2.91203	0.450866	0.100909	0.0902517	25	207
LUAD	OR2W3	-15.9367	0.965854	1.34688	0.729318	-0.0518362	0.943122	19	213
LUAD	ITGA2	-34.4557	0.0894566	-6.95964	0.319252	0.0702529	0.22199	12	220
LUAD	P2RY10	6.29173	0.858031	7.89848	0.994714	0.0285846	0.980619	12	220
LUAD	DAB1	-7.68494	0.301354	12.7945	0.0550848	0.12564	0.00387769	13	219
LUAD	INHBA	-6.97084	0.848579	-6.75154	0.498903	-0.00446862	0.653082	15	217
LUAD	DOCK10	-36.857	0.140748	2.64224	0.676393	0.0609178	0.103609	12	220
LUAD	MYO18A	6.79085	0.921345	-1.05447	0.879407	0.031641	0.635193	10	222
LUAD	MYH11	-20.3742	0.217413	-16.052	0.0284942	-0.053817	0.330062	13	219
LUAD	GRIK2	19.7988	0.428388	7.06751	0.219759	0.0232881	0.486658	19	213
LUAD	TLN2	-20.1446	0.504431	6.22436	0.561059	0.0802808	0.235966	14	218
LUAD	TMEM132B	9.80673	0.323563	21.8094	0.00353058	0.088271	0.0279938	12	220
LUAD	PRG4	-6.37503	0.394484	6.35689	0.95962	0.0261669	0.428548	11	221
LUAD	PIK3C2G	2.08964	0.523348	-4.50768	0.868022	0.0289884	0.351335	10	222
LUAD	NTRK3	-6.24409	0.407414	4.49311	0.705112	0.0413617	0.508356	21	211
LUAD	CACNA1D	-35.2637	0.0567871	7.63023	0.648991	0.0871499	0.0932363	10	222
LUAD	WSCD2	21.6696	0.621748	13.7234	0.14696	0.0288356	0.13107	13	219
LUAD	CKAP5	20.7171	0.520218	2.32968	0.767064	0.0703058	0.594567	10	222
LUAD	NFASC	10.8126	0.747196	-2.32445	0.806354	-0.00216094	0.912394	16	216
LUAD	MAGEC1	-20.3107	0.529849	9.89911	0.0582971	0.0816653	0.017574	30	202
LUAD	SORCS1	-21.3278	0.118627	6.53623	0.431215	0.0630094	0.0358193	35	197
LUAD	NID1	-15.2673	0.355864	0.0749537	0.85924	0.0388538	0.597243	18	214
LUAD	TBX5	-28.7788	0.0649064	-1.70489	0.583234	0.06852	0.14815	13	219
LUAD	FOXP2	-32.2891	0.210507	5.02093	0.573336	0.139128	0.0316512	12	220
LUAD	GABRQ	-34.0317	0.165578	6.69859	0.176207	0.123751	0.0226236	13	219
LUAD	SPATA18	-38.9568	0.222565	-4.44112	0.966957	0.0625724	0.215661	11	221
LUAD	SPAG17	-4.15491	0.679104	5.69648	0.684941	-0.0188446	0.693731	15	217
LUAD	FBN1	-23.7765	0.27742	0.25771	0.471479	0.000809499	0.88701	10	222
LUAD	FBN2	-9.73201	0.364801	-0.83146	0.709468	0.0310065	0.106061	43	189
LUAD	SORL1	-9.15787	0.0783191	0.0500902	0.385874	-0.0122828	0.652383	17	215
LUAD	MYH4	1.54433	0.353661	1.35722	0.484426	0.110519	0.0792358	19	213
LUAD	CCDC39	-5.73687	0.486434	19.4671	0.25066	0.108391	0.0300177	10	222
LUAD	ANO5	-41.6528	0.00767686	1.14462	0.65246	0.102203	0.189348	10	222
LUAD	ASXL3	6.1995	0.971686	3.92666	0.191098	0.0378148	0.0636638	29	203
LUAD	LAMC3	9.4062	0.514735	27.6462	0.0954442	0.0770772	0.124821	12	220
LUAD	ADAMTS19	-11.8839	0.321332	1.35722	0.850038	0.0523558	0.188056	19	213
LUAD	ABCB5	-12.1627	0.49609	7.92603	0.359496	-0.00900161	0.298171	26	206
LUAD	ENOX1	-48.9274	0.0797169	-5.79921	0.385581	0.0215053	0.20499	13	219
LUAD	PABPC3	-22.9578	0.202671	11.6285	0.206106	0.0820831	0.0502385	10	222
LUAD	CLCN1	-29.3833	0.308514	3.80719	0.771285	0.0537532	0.263964	18	214
LUAD	NUF2	-2.19419	0.861154	3.1817	0.655258	0.0261232	0.384341	11	221
LUAD	CTTNBP2	-26.7212	0.106449	-0.301719	0.876504	0.0108174	0.525814	18	214
LUAD	OR4A16	10.9396	0.997005	4.1832	0.761085	0.0349983	0.815968	17	215
LUAD	FCGBP	0.126426	0.957325	15.3963	0.112406	0.0426527	0.278154	19	213
LUAD	TCEB3B	-19.7392	0.387914	-7.13973	0.183103	-0.0239798	0.928829	13	219
LUAD	TLN1	-14.4154	0.468519	1.22721	0.925171	0.076163	0.17823	10	222
LUAD	CHD7	-15.7553	0.119998	-0.949777	0.670458	0.0109853	0.337531	23	209
LUAD	NDST4	-38.4158	0.0297502	3.1817	0.336436	0.180764	0.00164735	13	219
LUAD	OR2L3	0.126426	0.649679	2.72683	0.761085	-0.0105055	0.741149	17	215
LUAD	ABI3BP	-34.9758	0.0141232	-8.52613	0.615751	0.0588709	0.0789887	13	219
LUAD	CDH8	-25.7018	0.147963	15.3204	0.00685758	0.187853	0.000124944	23	209
LUAD	ADAMTS16	-1.10954	0.757669	3.61223	0.386101	0.03614	0.431817	26	206
LUAD	CDH6	1.54433	0.84445	1.35722	0.718621	-0.00713726	0.580305	19	213
LUAD	HNF4A	1.88683	0.699147	10.0027	0.330101	0.0615555	0.162135	12	220
LUAD	GRM8	-24.717	0.297566	9.65086	0.103798	0.105298	0.00628381	19	213
LUAD	ASCC3	-23.6431	0.274321	-5.85165	0.159498	0.0456003	0.8132	12	220
LUAD	COL3A1	-40.377	0.0107061	-1.01308	0.580899	0.0648105	0.0867126	25	207
LUAD	NDST3	13.0003	0.819035	-2.33541	0.68755	0.00451106	0.65246	10	222
LUAD	UNC5A	-46.877	0.0214537	6.34888	0.535965	0.238509	0.0133872	10	222
LUAD	SPEN	-37.3218	0.225447	4.49311	0.77893	0.154988	0.223823	13	219
LUAD	GPRIN1	23.1746	0.14696	6.92747	0.356033	-0.0323401	0.652103	13	219
LUAD	CUX2	-24.0132	0.394966	33.2725	0.00665643	0.18289	0.00260143	13	219
LUAD	OR5AS1	5.39211	0.577571	14.1322	0.257515	0.0886757	0.0370639	11	221
LUAD	SPHKAP	-14.436	0.415054	4.56814	0.519041	0.0878922	0.0918517	23	209
LUAD	ACSM2A	-37.5503	0.0389355	-4.73795	0.789301	0.150211	0.0171778	12	220
LUAD	PRDM2	0.126426	0.495738	-1.89769	0.843108	0.040361	0.59978	11	221
LUAD	MDC1	-21.7074	0.433809	9.44151	0.42537	0.0831096	0.303793	10	222
LUAD	EYA1	-28.4267	0.066134	-1.07337	0.792934	0.0425928	0.242801	10	222
LUAD	APOB	-39.8148	0.000752857	-0.0500902	0.701386	0.0837578	0.000321608	49	183
LUAD	TNXB	3.54239	0.821334	-3.98559	0.558654	-0.039684	0.390381	16	216
LUAD	CDH4	-30.6287	0.0589677	-6.75154	0.818345	0.0861584	0.187336	13	219
LUAD	ADAM2	-6.97084	0.846711	10.6827	0.289764	0.0124769	0.287672	11	221
LUAD	SORBS1	-29.3833	0.322271	3.12874	0.815293	0.0596928	0.558406	10	222
LUAD	OR14C36	-5.26059	0.448759	9.24247	0.22199	0.132334	0.0837753	12	220
LUAD	LRRIQ1	-8.86237	0.490221	0.0749537	0.85605	0.00718404	0.654092	26	206
LUAD	ZNF521	7.52186	0.589892	0.840865	0.318079	0.0995568	0.059942	28	204
LUAD	PLB1	-15.9367	0.543475	14.6965	0.0843398	0.0917137	0.0132754	11	221
LUAD	OR51G2	-16.0431	0.366471	-2.44471	0.366471	-0.00362868	0.770744	10	222
LUAD	ZFHX4	-23.3483	0.0212167	4.3747	0.352058	0.081501	0.000748345	76	156
LUAD	FAM135B	-15.6364	0.119702	2.92376	0.859853	0.0752036	0.0385274	42	190
LUAD	C2orf16	-31.1443	0.125012	6.85381	0.5846	0.140705	0.123832	10	222
LUAD	GRIA4	-6.37503	0.933428	10.168	0.185307	0.0467244	0.149883	15	217
LUAD	SHPRH	-29.9585	0.336723	-2.72408	0.79611	0.0782544	0.101748	12	220
LUAD	PCDHB3	-18.6666	0.135468	-1.01308	0.266959	0.0232881	0.714531	13	219
LUAD	UBR5	2.63983	0.94596	5.93833	0.810088	-0.0048166	0.913314	14	218
LUAD	GPR158	-24.9996	0.267109	4.9493	0.703484	0.0152648	0.234028	24	208
LUAD	HIVEP3	-2.84447	0.638452	0.840865	0.983955	0.0588222	0.587133	18	214
LUAD	ZSCAN4	7.40288	0.57443	-1.19697	0.66192	-0.0420068	0.835912	11	221
LUAD	POM121L12	-34.0221	0.0566783	-1.31529	0.428972	-0.0325553	0.650237	21	211
LUAD	NHS	-23.7247	0.172098	-3.4713	0.179788	-0.00520891	0.936656	10	222
LUAD	SCN11A	-35.3159	0.00299782	-9.54624	0.380466	0.0963545	0.0618956	14	218
LUAD	COL24A1	-41.6386	0.00855576	1.54452	0.876621	0.0615999	0.0344184	22	210
LUAD	RGAG1	-5.66093	0.747305	3.1207	0.952286	-0.0500144	0.402196	11	221
LUAD	ZFPM2	-25.6707	0.0666803	-0.614371	0.720425	0.0109853	0.303335	29	203
LUAD	COBL	-5.53	0.194719	-1.31529	0.83924	0.134516	0.154437	15	217
LUAD	PLXNA4	-15.2408	0.210883	4.1408	0.600608	0.0611764	0.0716576	29	203
LUAD	SAMD9L	-24.717	0.225048	6.35689	0.673287	0.0617576	0.0740979	15	217
LUAD	ITSN1	-8.31637	0.68611	3.26265	0.45941	0.0508493	0.334506	12	220
LUAD	OVCH1	6.2017	0.486658	0.0500902	0.827734	-0.0122828	0.88935	19	213
LUAD	SALL1	-31.4659	0.0918517	-0.435031	0.37859	0.0149073	0.76331	23	209
LUAD	2017-03-11	16.6329	0.319252	10.8196	0.124821	-0.00247647	0.555427	12	220
LUAD	RBBP6	-17.9525	0.522311	8.24462	0.843108	0.0215053	0.709279	11	221
LUAD	LONRF3	-23.6717	0.65942	4.9487	0.951991	-0.0219155	0.5846	10	222
LUAD	RYR3	-17.5941	0.201847	3.1207	0.685259	0.0597641	0.0603866	43	189
LUAD	HOXA1	-34.9463	0.442345	16.0653	0.376784	0.151064	0.0363678	10	222
LUAD	IQSEC3	21.0455	0.253666	9.77158	0.163124	0.0376924	0.352495	11	221
LUAD	FAM171B	-29.7953	0.321684	3.1817	0.83491	0.0643289	0.091309	13	219
LUAD	HECTD1	-35.0848	0.128606	-14.6217	0.0606489	-0.0493726	0.676948	10	222
LUAD	COL4A4	-37.6194	0.0672392	-8.74442	0.417187	0.155708	0.100775	14	218
LUAD	DENND2A	-6.97084	0.72648	15.2657	0.0885627	0.0440557	0.203954	11	221
LUAD	C8B	18.7942	0.348852	32.4076	0.0228568	0.09672	0.164658	10	222
LUAD	ADCY5	0.126426	0.66192	9.38663	0.487043	0.0432477	0.36698	11	221
LUAD	IMPG2	-11.4537	0.752394	1.17167	0.990393	-0.014765	0.88701	10	222
LUAD	SIGLEC10	-24.0132	0.0690492	7.52748	0.531329	0.21405	0.0102184	11	221
LUAD	COL11A1	-13.738	0.196595	4.3442	0.242268	0.0639099	0.0308325	52	180
LUAD	NCKAP5	-19.7392	0.260964	-0.614371	0.974771	0.048208	0.251334	31	201
LUAD	SYT4	-23.4976	0.514735	11.2136	0.075441	0.149391	0.0193504	12	220
LUAD	OR2G6	-22.5361	0.10838	-1.81542	0.385445	0.0348794	0.440863	12	220
LUAD	IL7R	-11.8892	0.361729	7.78675	0.745456	0.0842929	0.136045	12	220
LUAD	CACNA1F	-17.129	0.737813	11.1256	0.597907	0.0947857	0.430986	10	222
LUAD	MKRN3	-24.469	0.248679	1.47143	0.301534	0.00669819	0.789224	10	222
LUAD	PCDH11Y	-5.53	0.930312	-2.99574	0.381831	0.00177455	0.543475	11	221
LUAD	UGT2B15	27.3497	0.0300177	34.4107	0.00338013	0.0727141	0.0783316	10	222
LUAD	RIMS1	-41.7558	0.23134	25.1536	0.018871	0.191258	0.00246829	10	222
LUAD	ADAM19	-17.7012	0.527085	3.68498	0.335741	0.0669153	0.0871862	15	217
LUAD	ZNF479	-23.5588	0.249211	-6.91723	0.117076	-0.033219	0.638101	14	218
LUAD	EPHA6	-7.68494	0.988201	6.69859	0.210883	0.0136794	0.269918	29	203
LUAD	PLXNA2	18.2939	0.705856	15.1793	0.0911773	0.069802	0.0748674	11	221
LUAD	ZNF560	-34.3493	0.0285879	-11.523	0.363921	0.0388538	0.189348	10	222
LUAD	NTM	-27.5985	0.357098	7.30075	0.43046	0.0258055	0.284133	12	220
LUAD	MS4A14	-31.5616	0.147792	-1.96079	0.526488	0.0274307	0.5846	10	222
LUAD	GFRAL	-38.55	0.214879	-7.3129	0.406056	-0.0285758	0.77443	10	222
LUAD	OR2T6	-6.97084	0.905204	15.3416	0.0768365	0.0241994	0.161719	13	219
LUAD	PCLO	-18.4085	0.276197	-3.91343	0.288891	-0.0204865	0.892899	51	181
LUAD	BAGE2	-21.2603	0.115797	0.614371	0.980884	0.0178396	0.157464	65	167
LUAD	TEP1	-10.4055	0.672509	3.6779	0.420888	0.0510106	0.275472	16	216
LUAD	OCA2	-29.6875	0.50158	-7.3877	0.31789	-0.0105055	0.534353	11	221
LUAD	ATRX	-28.45	0.0160875	2.67879	0.92465	0.0351148	0.287544	16	216
LUAD	ADAMTS12	-25.0293	0.0238237	1.35722	0.942684	0.0735689	0.0753627	49	183
LUAD	KIAA0408	2.34551	0.771835	11.486	0.0467674	0.0545858	0.102262	11	221
LUAD	PCNXL2	1.35516	0.712273	-2.11621	0.941903	-0.0283446	0.68936	12	220
LUAD	ABCC8	-32.4375	0.47445	-2.87161	0.591236	0.0893191	0.290405	10	222
LUAD	SEMA5B	-0.0137172	0.526201	4.18248	0.520452	0.136006	0.0740009	12	220
LUAD	PCNX	7.8792	0.798573	4.32014	0.935592	0.0124769	0.762668	13	219
LUAD	LTBP2	-5.66093	0.62777	21.2794	0.0642912	0.0993712	0.0056254	13	219
LUAD	VCAN	-12.5877	0.357641	3.67081	0.582219	0.0648105	0.119758	29	203
LUAD	LRRTM4	0.126426	0.302266	3.28587	0.897087	0.0921953	0.1485	25	207
LUAD	OR2W5	-41.8999	0.0352609	13.3817	0.119546	0.163719	0.00113904	13	219
LUAD	MN1	-39.2721	0.0438286	0.611505	0.826531	0.0391126	0.0464101	10	222
LUAD	OR4C16	13.839	0.6593	10.5606	0.285422	0.0428208	0.469568	20	212
LUAD	MMP16	0.126426	0.899619	4.1408	0.537183	0.0288356	0.364477	21	211
LUAD	DUSP27	0.126426	0.533999	9.77158	0.523292	0.0248396	0.407599	23	209
LUAD	PCDHGA1	8.26727	0.455062	3.92666	0.250697	0.0625724	0.249152	17	215
LUAD	NOS1	-19.6704	0.743821	17.1423	0.108193	0.150833	0.0868535	11	221
LUAD	LMO7	-17.3161	0.705357	-1.53174	0.752394	0.0175923	0.890816	10	222
LUAD	DNAH9	-34.3081	0.00119622	6.83317	0.279811	0.112301	0.000519673	46	186
LUAD	HCRTR2	-34.0317	0.390234	5.69648	0.723324	0.0617576	0.191995	15	217
LUAD	CDH2	-5.05437	0.692123	-6.01772	0.477764	-0.03514	0.780818	19	213
LUAD	PPARGC1A	-18.2458	0.417028	10.4558	0.392586	0.142872	0.0265533	10	222
LUAD	PRKCB	-6.37503	0.247058	5.69648	0.607861	0.0643289	0.177512	15	217
LUAD	PCDHA10	-13.7121	0.765599	5.69076	0.622382	0.0757651	0.302386	12	220
LUAD	MUC17	-12.5608	0.132738	2.42626	0.747518	0.0501382	0.0667711	58	174
LUAD	KIAA2022	-6.37503	0.188056	3.84734	0.679011	0.0432477	0.180976	19	213
LUAD	LAMC1	6.1995	0.756192	14.9999	0.114577	0.0908919	0.214257	13	219
LUAD	TSHZ2	-34.9286	0.165938	0.840865	0.183647	0.103067	0.00457936	20	212
LUAD	CNGB3	-6.24409	0.574891	1.34688	0.95559	-0.00177455	0.503967	15	217
LUAD	PEG3	2.07558	0.955832	4.35343	0.269752	0.0212575	0.212462	36	196
LUAD	GRIA1	-31.5983	0.218462	-4.66566	0.834042	0.0091112	0.611351	10	222
LUAD	F8	-26.0338	0.0743283	3.80211	0.914803	0.0279994	0.15781	26	206
LUAD	CSMD3	-18.8168	0.011114	4.27504	0.510309	0.0371126	0.0073925	105	127
LUAD	NR4A2	-8.69893	0.298234	-2.09036	0.658586	0.0560795	0.843108	11	221
LUAD	MEGF10	3.58977	0.638631	3.85188	0.785518	0.044715	0.202671	10	222
LUAD	SENP7	-23.7512	0.306063	-0.499934	0.539142	0.132416	0.0513797	10	222
LUAD	GABRA2	-9.48787	0.653931	1.96025	0.582391	0.050343	0.196384	12	220
LUAD	SLC2A10	-31.617	0.189348	2.67879	0.936656	0.0118613	0.397941	10	222
LUAD	BICC1	-35.212	0.354796	-0.391389	0.336723	0.127716	0.0289532	12	220
LUAD	MAGEE1	-7.0575	0.834042	8.03853	0.149145	0.0179124	0.77443	10	222
LUAD	SEZ6L	-38.3778	0.0193121	-1.31416	0.652843	0.0832921	0.0401795	14	218
LUAD	FOLH1	-28.0232	0.295915	-0.895048	0.759001	0.0378148	0.537134	19	213
LUAD	SPEG	-16.8002	0.244179	5.41591	0.218539	0.0801056	0.0177275	18	214
LUAD	IGSF3	-7.90511	0.414268	5.46412	0.604612	0.105658	0.0775191	10	222
LUAD	OR4C46	-12.0783	0.984143	13.7919	0.0614106	0.106206	0.0410738	12	220
LUAD	COL4A6	-21.6202	0.300377	8.62956	0.648624	-0.0105055	0.458665	11	221
LUAD	FBXL7	-33.2039	0.0446121	-1.24167	0.601306	0.10218	0.0217084	22	210
LUAD	NTNG1	-29.0016	0.0723061	1.94079	0.625446	0.118523	0.0136505	18	214
LUAD	FRY	-4.15491	0.991015	4.56814	0.798525	0.0828618	0.327216	17	215
LUAD	BSN	-32.4375	0.726939	9.5536	0.139871	0.112378	0.100998	10	222
LUAD	ARAP2	-30.8225	0.0842145	-11.3018	0.0590055	0.0376924	0.707379	17	215
LUAD	URB2	1.54433	0.966957	18.9189	0.132296	0.0618773	0.164517	11	221
LUAD	SLC12A1	-12.5877	0.483875	-1.19697	0.993653	-0.0112757	0.836133	15	217
LUAD	ZWINT	-26.4246	0.275295	9.76614	0.149145	0.128031	0.00298378	10	222
LUAD	UGT2B28	-40.0708	0.0115066	-8.57651	0.0911773	0.0670743	0.504515	11	221
LUAD	HGF	-2.33239	0.806145	15.0944	0.0128073	0.113118	0.0109014	22	210
LUAD	RBM10	-19.9668	0.0379075	6.72581	0.882904	0.0788429	0.0676541	11	221
LUAD	CPS1	-15.3001	0.274938	10.1974	0.0417198	0.0673727	0.00927186	30	202
LUAD	OR8H3	0.126426	0.780673	9.38663	0.408027	0.0349983	0.34379	15	217
LUAD	DNAH7	-19.7392	0.258737	-0.0500902	0.949692	0.0453213	0.447086	25	207
LUAD	ZSCAN1	-53.2021	0.132296	10.6827	0.271304	0.206158	0.00918278	11	221
LUAD	GABRG2	-16.752	0.0426064	8.36852	0.170883	0.103794	0.0067016	18	214
LUAD	ANO7	5.85828	0.392586	7.43038	0.369033	0.0243388	0.894624	10	222
LUAD	AKAP6	-20.9205	0.118389	3.67081	0.701805	0.0268681	0.284697	17	215
LUAD	PPP1R3A	1.02229	0.495275	-1.70283	0.490662	-0.0420204	0.615124	18	214
LUAD	PKD1L2	-21.1652	0.0990034	3.50564	0.687238	0.0136794	0.236054	23	209
LUAD	CEP192	-11.0605	0.594568	-0.754709	0.913827	0.103623	0.634923	12	220
LUAD	CNTN5	-36.3292	0.229287	4.94964	0.783557	0.02027	0.128588	19	213
LUAD	SYNE1	-27.0359	0.0762086	-7.82876	0.135211	-0.0127389	0.936577	28	204
LUAD	CENPF	-2.37129	0.441478	3.52168	0.850633	0.0438186	0.363536	18	214
LUAD	MTOR	-36.5944	0.028687	14.9364	0.110695	0.0929655	0.00288877	15	217
LUAD	NBEA	-9.73201	0.247754	3.56664	0.37248	0.113951	0.0298166	19	213
LUAD	ROBO1	-20.6928	0.168189	5.87582	0.554387	0.0232881	0.143437	13	219
LUAD	SLC35F1	-19.6704	0.645984	-2.27734	0.686171	0.040361	0.454117	13	219
LUAD	PTPRN2	-5.66093	0.908164	6.53623	0.561408	-0.00446862	0.723324	15	217
LUAD	KLHL4	12.1906	0.895565	-1.69824	0.936591	0.0992614	0.34379	15	217
LUAD	TIAM1	1.54433	0.458479	3.1207	0.738079	0.0374742	0.321893	25	207
LUAD	CDH10	-13.9531	0.10964	2.74407	0.524579	0.0389455	0.0930544	48	184
LUAD	MYO5B	6.1995	0.59978	8.38095	0.577571	-0.0338515	0.668609	11	221
LUAD	SLC39A12	-40.6657	0.00233194	4.76705	0.48034	0.127252	0.00109888	20	212
LUAD	CSMD1	-42.1817	8.27e-05	6.53022	0.290872	0.128701	1.9e-06	46	186
LUAD	MYH2	-17.2997	0.0816432	2.54643	0.783915	0.040591	0.21545	36	196
LUAD	ASPM	-20.9205	0.412088	3.68498	0.857932	0.0221709	0.336136	37	195
LUAD	HEPH	-21.1673	0.625314	14.6738	0.00942941	0.14461	0.0457463	16	216
LUAD	LPHN2	-19.0377	0.322195	12.3794	0.317323	0.0906705	0.0205875	22	210
LUAD	DYSF	0.126426	0.419025	9.95092	0.334303	0.0067275	1	13	219
LUAD	PNLIPRP2	8.55431	0.447578	15.1793	0.137095	0.0376924	0.203954	11	221
LUAD	TGM4	-24.0132	0.394484	5.97194	0.90839	0.0376924	0.593395	11	221
LUAD	SI	-28.1891	0.0449822	2.52397	0.848034	0.0743363	0.0695985	38	194
LUAD	C6orf118	-19.1022	0.345059	13.3817	0.606804	0.108776	0.104219	13	219
LUAD	MYO7B	23.9678	0.0656205	15.3837	0.0388266	-0.0067275	0.601936	21	211
LUAD	MUC7	2.28514	0.744274	-2.90307	0.721031	0.0656053	0.169954	16	216
LUAD	CACNA1G	-50.5849	0.00616913	-1.31529	0.648624	0.16035	0.0179898	11	221
LUAD	OR6K3	-43.2467	0.0390279	7.30075	0.680475	0.128399	0.0372368	10	222
LUAD	NLRP2	-35.3987	0.0203859	6.68716	0.856665	0.148663	0.0496759	10	222
LUAD	CCDC40	-27.3909	0.414268	-2.16119	0.871814	-0.0198463	0.9137	10	222
LUAD	ZCCHC5	1.54433	0.658586	15.2657	0.0956723	0.119767	0.164517	11	221
LUAD	OR2M4	-9.48135	0.592887	8.36852	0.339358	0.0332421	0.381918	16	216
LUAD	EPRS	9.40939	0.932826	-1.57575	0.591236	0.0371771	0.917522	10	222
LUAD	CACNA1E	-8.03248	0.78157	14.1436	0.0051279	0.0880829	0.00484446	39	193
LUAD	EPHB6	-32.6138	0.317835	-6.86986	0.532695	0.0374742	0.463562	21	211
LUAD	DOPEY2	33.8343	0.381831	-16.3708	0.0287922	-0.0828572	0.14328	11	221
LUAD	ARPP21	11.2711	0.254699	11.8282	0.0157292	0.0451493	0.149161	18	214
LUAD	PDILT	-69.2727	0.00395183	7.63023	0.543642	0.232416	0.000361656	12	220
LUAD	OR1C1	6.38193	0.701782	6.07178	0.601256	0.0991002	0.513987	10	222
LUAD	FLNC	-17.7012	0.295493	1.91116	0.323897	0.143296	0.0145925	15	217
LUAD	GABRA6	-37.033	0.023653	-6.6954	0.571612	0.0535082	0.268796	13	219
LUAD	MAGEL2	-20.2301	0.713129	10.0753	0.913314	0.0267097	0.949231	14	218
LUAD	REG3A	-30.6287	0.0842398	4.106	0.37248	0.0947571	0.0076218	19	213
LUAD	MYH8	7.55368	0.579574	-2.16119	0.781201	0.00851836	0.589892	28	204
LUAD	PHF20L1	17.9	0.105497	5.08949	0.41766	0.00750412	0.555427	12	220
LUAD	OSBPL3	1.02229	0.624927	9.91433	0.327003	0.0776591	0.0941794	10	222
LUAD	SLC8A3	-6.97084	0.350116	-0.0500902	0.298234	0.107773	0.0543594	11	221
LUAD	ADAMTSL1	-6.37503	0.509057	-0.614371	0.605081	-0.0504212	0.624656	15	217
LUAD	KCNT2	-7.07883	0.322901	3.50564	0.721256	0.0319189	0.238653	23	209
LUAD	SAMD9	-33.6568	0.0927282	-10.8801	0.221784	0.00851836	0.68665	16	216
LUAD	KNTC1	-5.66093	0.821562	22.0387	0.00368012	0.180927	0.00506151	11	221
LUAD	ANKRD26	-1.63141	0.606196	-3.03545	0.609415	-0.00177455	0.91569	11	221
LUAD	OR2T12	-29.5743	0.239161	0.977576	0.952453	0.0503922	0.185888	12	220
LUAD	EPHA5	-11.0419	0.0581445	-0.83146	0.883429	0.0648105	0.0954181	31	201
LUAD	PDE11A	-23.1877	0.169093	14.3452	0.448088	0.0737523	0.1	10	222
LUAD	MUC16	-14.0096	0.126191	0.424426	0.643211	-0.000217589	0.291305	104	128
LUAD	FAT3	8.55431	0.554438	6.93911	0.163362	0.0435522	0.169705	55	177
LUAD	OR4Q3	19.9672	0.406889	17.1423	0.0465346	0.137185	0.0601179	13	219
LUAD	COL6A2	8.48523	0.624927	15.6732	0.0567871	0.0995533	0.120342	10	222
LUAD	MGA	1.54433	0.420697	-0.776731	0.542644	0.0499448	0.704173	23	209
LUAD	LRRIQ3	-41.7703	0.0114047	8.8089	0.973049	0.0913888	0.111474	17	215
LUAD	GRM5	-36.8897	0.0405687	-1.2816	0.333536	0.056899	0.363292	16	216
LUAD	COL5A2	-36.6349	0.0463358	8.42383	0.0624336	0.164203	0.000406645	28	204
LUAD	ADAMTS2	-21.9252	0.350178	9.95896	0.119743	0.154587	0.00133379	18	214
LUAD	DNAH1	-7.0619	0.466813	5.27004	0.666884	0.0974671	0.211731	16	216
LUAD	OR2B11	9.68116	0.454117	-0.435031	0.426408	0.0149073	0.838232	13	219
LUAD	BDP1	-19.9789	0.164027	-5.93335	0.369436	0.0405738	0.543185	16	216
LUAD	CUBN	-22.8167	0.158994	5.33556	0.559908	0.0615999	0.0738604	24	208
LUAD	PSG2	-60.5136	0.00557258	0.25771	0.792934	0.142051	0.058051	10	222
LUAD	MAGEA10	-21.7369	0.673428	-10.1351	0.906063	0.0401881	0.204384	10	222
LUAD	SERPINA4	-21.2145	0.0599905	-3.89701	0.430986	0.0481921	0.33178	10	222
LUAD	NRP2	23.1746	0.879272	6.56513	0.489932	0.134516	0.11977	11	221
LUAD	GALNT13	-41.1961	0.200695	11.0895	0.36454	0.091963	0.0437981	11	221
LUAD	ADAMTS15	-24.0132	0.464265	-0.614371	0.91569	0.0852236	0.439364	11	221
LUAD	CFHR2	-42.0702	0.0119021	-0.0500902	0.775424	0.131588	0.00620954	17	215
LUAD	FAM83C	-12.5877	0.46146	3.1207	0.404787	0.0588709	0.37189	11	221
LUAD	LAMB2	13.2421	0.890816	-14.2654	0.248679	-0.0101762	0.361381	10	222
LUAD	PCDHB2	-18.3881	0.391933	6.90515	0.331455	0.0643289	0.0549389	11	221
LUAD	SLC14A2	-18.4525	0.354273	10.6351	0.22012	0.172001	0.00781712	14	218
LUAD	C10orf71	-5.1995	0.88701	9.67842	0.25667	0.0823382	0.33178	10	222
LUAD	POSTN	-38.4426	0.189348	-3.45997	0.906063	0.0104698	0.545526	10	222
LUAD	KIF4B	-23.587	0.0558632	-1.58657	0.384063	0.0420302	0.271879	19	213
LUAD	PDZRN3	-20.3241	0.413972	-7.0402	0.911943	0.0642466	0.179815	19	213
LUAD	PLCL1	-1.10954	0.309293	9.484	0.507057	-0.0563835	0.731591	14	218
LUAD	MEPE	-21.8762	0.54233	11.3343	0.080811	0.0937338	0.0246451	10	222
LUAD	THBS2	-32.6138	0.220824	4.22256	0.36454	0.10193	0.0741189	11	221
LUAD	CR1	1.54433	0.93221	7.06751	0.215831	0.0426527	0.27623	13	219
LUAD	SERPINA6	-29.7953	0.0984535	-2.09036	0.825144	0.0109853	0.263364	11	221
LUAD	NPFFR2	17.4795	0.376784	23.8092	0.0170049	0.0775763	0.0448463	10	222
LUAD	NMUR2	-12.083	0.406056	11.3172	0.0960888	0.077375	0.0606489	10	222
LUAD	SLC5A11	14.887	0.400635	0.0749537	0.815293	-0.0481979	0.41152	10	222
LUAD	ERCC5	0.216018	0.785518	14.2425	0.252652	0.105278	0.145115	10	222
LUAD	CADPS	-24.0132	0.620248	18.9476	0.0500573	0.197909	0.0184047	17	215
LUAD	GRM7	0.216018	0.822138	12.6597	0.219245	0.0713795	0.115586	20	212
LUAD	PRKD1	-19.5204	0.655808	11.8446	0.25948	0.0780599	0.163126	14	218
LUAD	F5	-36.5293	0.250697	-1.58657	0.889537	0.0587736	0.255373	17	215
LUAD	DSG4	-20.0861	0.277991	8.94523	0.226771	0.0599037	0.122878	17	215
LUAD	OR2T33	-33.7166	0.00658387	1.35722	0.910422	0.0899275	0.0345367	21	211
LUAD	GAD2	-29.2332	0.120342	-5.2629	0.495529	0.00101303	0.902248	10	222
LUAD	BCLAF1	-19.8089	0.0717277	-7.85712	0.303332	0.00772696	0.686178	18	214
LUAD	FRMPD1	-13.5413	0.0572545	7.3239	0.312329	0.0929655	0.0164587	15	217
LUAD	SLC17A6	-13.2232	0.819035	12.5539	0.170591	0.131061	0.0816515	10	222
LUAD	PCDH9	40.2	0.495738	23.3851	0.124213	0.104482	0.186502	11	221
LUAD	CCDC141	-25.9619	0.12374	0.25771	0.889347	0.0910509	0.0869849	12	220
LUAD	SLC9A4	-5.1995	0.319922	5.32306	0.752394	0.00266981	0.752394	10	222
LUAD	GPR101	-38.4426	0.0636363	12.9554	0.583414	0.035299	0.215518	14	218
LUAD	GRIN2B	-6.37503	0.682723	3.1207	0.769647	0.0136794	0.664903	27	205
LUAD	SLC17A3	19.3722	0.702439	5.33458	0.552674	0.00177455	0.381831	11	221
LUAD	MEGF8	-1.63141	0.875643	-8.34733	0.236843	-0.0744859	0.109207	11	221
LUAD	KIAA1429	8.02713	0.767064	13.968	0.356336	0.0494966	0.301534	10	222
LUAD	IRS1	-48.251	0.0258343	1.73182	0.854885	0.0430477	0.178942	13	219
LUAD	ITGA8	-2.13037	0.749126	1.14462	0.922258	0.037538	0.428814	28	204
LUAD	CFHR5	-24.717	0.215661	-2.27734	0.879272	0.0643289	0.109207	11	221
LUAD	TSHZ3	-13.9963	0.249318	-2.05318	0.954783	0.0377039	0.157948	34	198
LUAD	KCNB2	-21.474	0.22452	-1.91325	0.309658	-0.0154834	0.968029	20	212
LUAD	ATG2B	-39.1171	0.0437981	-0.894758	0.537385	0.0753237	0.0697555	11	221
LUAD	PLCE1	-19.3705	0.252249	8.62956	0.538145	0.088827	0.0727641	17	215
LUAD	CTCFL	20.9762	0.77235	4.03634	0.546577	-0.0133696	0.833824	12	220
LUAD	PCDH15	-22.8165	0.0431294	3.50564	0.62816	0.0523558	0.205672	47	185
LUAD	KCNQ2	-18.5274	0.425313	2.77799	0.955971	0.0227508	0.350222	12	220
LUAD	LEPR	-44.1832	0.0132078	-5.45005	0.20784	0.0830883	0.216665	10	222
LUAD	CMYA5	-20.0861	0.392432	7.86918	0.174968	0.0669153	0.0901665	15	217
LUAD	OR10J3	-35.3257	0.174408	-2.08944	0.514735	-0.0113316	0.809774	12	220
LUAD	OR4N5	-19.7723	0.248679	9.77352	0.310638	0.0940442	0.0675674	10	222
LUAD	PCDHA3	-3.77926	0.768976	8.23508	0.116119	0.0877352	0.0648192	14	218
LUAD	DSC3	-5.97392	0.752394	2.71357	0.898435	0.00772696	0.781817	10	222
LUAD	LRRC4C	-20.3241	0.266517	-7.45586	0.50163	0.0109853	0.854064	17	215
LUAD	COL2A1	2.76312	0.71972	8.70041	0.240864	0.0171367	0.529637	10	222
LUAD	KCNH7	-22.7587	0.260109	1.35722	0.922251	0.0494691	0.404653	17	215
LUAD	KNDC1	8.69392	0.885858	-4.45663	0.585424	-0.0120201	0.917332	12	220
LUAD	NIPBL	-16.2312	0.493997	-1.80142	0.424298	-0.0282675	0.555536	14	218
LUAD	TP53	-18.6998	0.0123924	-1.86019	0.384882	0.0327936	0.190601	126	106
LUAD	OR5J2	-23.5588	0.673711	-0.655919	0.6918	0.0876173	0.282725	14	218
LUAD	TCHHL1	1.10914	0.925171	4.73879	0.422579	0.0723097	0.233223	10	222
LUAD	TRPM1	15.9189	0.436305	6.06156	0.271827	0.0523502	0.481118	14	218
LUAD	ZNF385D	-26.889	0.40334	2.67879	0.898435	0.0140498	0.471479	10	222
LUAD	LPHN3	-1.63141	0.473473	-2.23201	0.987831	0.0587736	0.200138	27	205
LUAD	ARHGAP21	9.61996	0.890816	5.87985	0.42537	0.0302741	0.348852	10	222
LUAD	THSD7B	-38.9691	0.00331006	-0.922268	0.68687	0.0911657	0.0215513	24	208
LUAD	C7	-19.4207	0.762528	11.5786	0.194587	0.0924277	0.0534211	22	210
LUAD	SEMA3A	-24.717	0.101527	-3.14751	0.256119	0.0445821	0.80515	13	219
LUAD	PIK3CG	14.74	0.598238	3.52168	0.398957	0.0233805	0.49565	16	216
LUAD	OR2G2	9.96264	0.456813	14.1941	0.0278492	0.056899	0.180207	18	214
LUAD	PCDHA7	-15.8923	0.55247	5.5644	0.820061	0.0179589	0.920838	12	220
LUAD	BAI3	-38.294	0.0329651	7.93821	0.104108	0.0901532	0.00558933	30	202
LUAD	STXBP5L	-42.8112	0.0224073	-3.59157	0.791446	0.0790381	0.0265708	16	216
LUAD	SLITRK3	-19.9668	0.0653546	3.1207	0.533999	0.0496111	0.188229	23	209
LUAD	UBN2	-16.6405	0.583234	4.1832	0.600872	-0.03514	0.667504	13	219
LUAD	KCNK2	0.618595	0.728503	-4.57745	0.212489	-0.0331625	0.410147	14	218
LUAD	EIF4G1	-24.0443	0.825144	3.41857	0.729938	-0.0214031	0.941293	11	221
LUAD	CEP170	-27.0843	0.495529	0.96019	0.955827	0.0688481	0.417028	10	222
LUAD	COL22A1	-7.49019	0.490741	10.4487	0.0878107	0.059482	0.0349076	28	204
LUAD	TEX15	-13.2232	0.677713	8.29499	0.145991	0.0832921	0.0879501	32	200
LUAD	OBSCN	-8.38874	0.0801199	-0.83146	0.993605	0.0931567	0.0265858	37	195
LUAD	FSCB	26.0677	0.0518705	4.56426	0.440975	-0.0395071	0.51848	19	213
LUAD	CHD5	-22.8323	0.563831	9.52461	0.354273	0.0143563	0.309293	14	218
LUAD	ERBB4	-11.5784	0.281331	3.92666	0.701805	0.0376924	0.168315	17	215
LUAD	MAGI1	-45.2738	0.0525425	2.78472	0.807823	0.0267121	0.202671	10	222
LUAD	SLIT2	-21.3725	0.181339	3.12874	0.592685	0.063284	0.137459	30	202
LUAD	SCN7A	-3.78446	0.607977	-7.20837	0.737813	-0.0562788	0.456781	10	222
LUAD	GUCY1A2	-33.9752	0.0574454	9.22543	0.458404	0.119169	0.0512714	14	218
LUAD	CSRNP3	-33.3352	0.346379	1.79918	0.74145	0.140796	0.0368001	10	222
LUAD	PKHD1L1	-27.7943	0.0690601	4.56426	0.172719	0.0974964	0.00235615	27	205
LUAD	MASP1	-55.6463	0.0183885	1.8473	0.879407	0.0549942	0.10715	10	222
LUAD	MED12	14.1071	0.331643	11.4248	0.0560639	0.0644552	0.15866	18	214
LUAD	ITGAE	-19.1607	0.207251	-0.614371	0.864772	0.0834643	0.431238	11	221
LUAD	SCN4A	-5.69541	0.932826	-2.70233	0.890816	-0.0410663	0.990393	10	222
LUAD	REG3G	-11.4423	0.30864	13.0936	0.327912	0.0810573	0.0981066	12	220
LUAD	PCDH18	-34.9853	0.0189091	1.34688	0.686867	0.123221	0.0121469	19	213
LUAD	AHNAK	-16.6013	0.201944	7.76736	0.629667	0.0550001	0.104517	26	206
LUAD	ZNF831	-44.0743	0.00139674	-0.0500902	0.565904	0.0471861	0.0870663	33	199
LUAD	CELSR3	-15.9367	0.644286	0.168407	0.845239	0.0826344	0.701805	17	215
LUAD	FCRL3	-22.535	0.266906	-5.77824	0.213103	0.0253263	0.852886	10	222
LUAD	PTPRZ1	-27.3702	0.170956	1.34688	0.697996	0.0622392	0.126793	25	207
LUAD	PSG11	-28.9712	0.122742	-0.83146	0.532295	0.0140036	0.641648	15	217
LUAD	OR6T1	-38.963	0.0560973	7.07174	0.738779	0.0706516	0.22199	12	220
LUAD	SDK2	-23.2393	0.371606	-1.26485	0.806905	0.0449164	0.463399	14	218
LUAD	BCAN	1.54433	0.923945	4.49311	0.263675	0.16035	0.0879237	15	217
LUAD	NID2	7.33704	0.95962	-1.89769	0.602984	-0.0214031	0.843108	11	221
LUAD	PDE4B	-14.5064	0.15188	12.8729	0.216665	0.149803	0.0363678	10	222
LUAD	OR4K2	-19.4289	0.102676	-7.3797	0.272387	0.0421919	0.712273	12	220
LUAD	NCKAP1L	-29.675	0.104209	5.89362	0.695623	0.0376924	0.217373	11	221
LUAD	PLCG2	1.41242	0.745456	-3.71761	0.582391	0.0121129	0.514735	12	220
LUAD	KRAS	-25.045	0.042728	-0.088177	0.504886	0.0418215	0.197633	40	192
LUAD	TRPA1	-11.2342	0.777844	9.26532	0.12254	0.0563179	0.105019	22	210
LUAD	DTNA	-5.53	0.882993	16.1502	0.168729	0.134516	0.107182	15	217
LUAD	ABCA12	-33.0445	0.0333044	7.10681	0.696246	0.0614422	0.0948338	17	215
LUAD	NBPF1	-36.618	0.104606	11.525	0.256938	0.181697	0.00129089	15	217
LUAD	HHIPL2	-5.67268	0.816628	-3.28699	0.695879	-0.0328344	0.896332	12	220
LUAD	FRMPD4	-0.216392	0.878887	-1.42319	0.738779	-0.0493245	0.359409	12	220
LUAD	TNR	-4.28461	0.455895	3.70699	0.664908	0.0613867	0.0764002	42	190
LUAD	PCDH20	-17.971	0.673166	3.70658	0.725485	0.110236	0.10838	12	220
LUAD	ADCY8	5.2261	0.347594	7.50143	0.38454	0.00325834	0.819427	20	212
LUAD	ANO3	-52.547	0.111259	-10.375	0.467079	0.0468005	0.436646	11	221
LUAD	HOXB3	0.126426	0.754289	3.28587	0.857539	0.0349983	0.843108	11	221
LUAD	SND1	-28.0203	0.0255838	-13.67	0.0330625	0.00181581	0.928998	10	222
LUAD	OR2L2	9.49651	0.819035	-6.20933	0.662911	0.0316852	0.852886	10	222
LUAD	FAT2	-19.8089	0.0563711	-9.86175	0.122179	0.0143414	0.644231	20	212
LUAD	ROBO4	9.83621	0.371605	16.53	0.0390279	0.10213	0.202671	10	222
LUAD	DNAH5	-12.8069	0.109859	-2.91713	0.412267	0.0432477	0.295213	35	197
LUAD	PXDN	-27.5408	0.0316915	-1.26485	0.958437	0.0700277	0.0372827	16	216
LUAD	DCAF12L1	-6.37503	0.871768	15.1034	0.0822107	0.111108	0.0368789	17	215
LUAD	SIPA1L2	-3.05883	0.36741	0.421677	0.432849	0.0200053	0.963544	18	214
LUAD	TRPC6	-5.76847	0.930312	3.1207	0.648624	0.0136794	0.37189	11	221
LUAD	JMJD1C	-0.134412	0.731591	9.13982	0.373809	0.0587633	0.182527	14	218
LUAD	ASH1L	-40.0877	0.0219569	-8.16645	0.255592	0.0205681	0.464453	16	216
LUAD	OR56A4	-37.3218	0.0683487	12.4528	0.269304	0.206158	0.00326969	11	221
LUAD	PASD1	9.55253	0.534353	4.94964	0.450335	-0.0105055	0.658586	11	221
LUAD	ARID1A	-5.05437	0.802125	9.28852	0.0471561	0.138891	0.0310884	15	217
LUAD	DSCAM	-38.294	0.020938	16.5456	0.00362851	0.216528	0.000105425	18	214
LUAD	HAS2	-24.717	0.0835151	-9.15123	0.682065	-0.0112757	0.510411	11	221
LUAD	CACNA1S	-15.8424	0.785518	-1.15963	0.673428	0.112354	0.184522	10	222
LUAD	MGAT5B	9.68116	0.79529	-1.19697	0.692437	0.00177455	0.905204	13	219
LUAD	SETBP1	-24.717	0.115443	6.53623	0.0711552	0.120107	0.000703675	25	207
LUAD	HDAC9	-2.48514	0.732622	-0.785125	0.46918	-0.006391	0.647347	16	216
LUAD	ZNF423	19.9672	0.116629	21.1767	0.0692431	0.0732876	0.241527	17	215
LUAD	OR4A5	-42.1019	0.0115752	-6.72101	0.20647	0.0453949	0.554835	18	214
LUAD	CARD11	6.2017	0.946087	8.24462	0.59127	0.0405088	0.661711	15	217
LUAD	NOS2	-36.2964	0.0853679	2.57024	0.762231	0.0543592	0.446118	12	220
LUAD	TECTA	5.95099	0.835659	7.54764	0.373809	0.0700671	0.0756227	14	218
LUAD	OR5F1	-16.5647	0.319169	4.13402	0.214	0.137003	0.0159838	14	218
LUAD	AOAH	11.3545	0.425869	14.2097	0.504515	-0.00939615	0.668609	11	221
LUAD	OR4N2	-19.6704	0.168729	-1.61524	0.987305	0.0887202	0.22052	15	217
LUAD	TRIM42	-8.01939	0.785518	6.40165	0.369033	0.13395	0.157462	10	222
LUAD	EDIL3	-16.3747	0.066134	0.257201	0.88701	0.0743079	0.0234399	10	222
LUAD	COL9A1	-29.675	0.196091	-0.83146	0.817541	0.0588709	0.112485	15	217
LUAD	LDB2	-8.05232	0.707011	12.1959	0.247528	0.0964817	0.196379	14	218
LUAD	NPHP4	-27.1943	0.0496759	3.52685	0.621521	0.0326592	0.571431	10	222
LUAD	LRRK2	-28.4972	0.347907	-12.4205	0.264724	-0.0544205	0.473479	14	218
LUAD	LRRC7	-7.07883	0.467	5.51392	0.676773	0.0374742	0.109935	31	201
LUAD	CNTNAP5	-37.8699	0.0267343	9.25443	0.722639	0.0886757	0.0145607	29	203
LUAD	ZNF648	-24.0209	0.182934	5.83772	0.662911	0.0523038	0.129822	10	222
LUAD	TMEM200A	21.6559	0.505469	15.3717	0.0379927	0.0465822	0.146108	16	216
LUAD	ADAMTSL3	-20.1455	0.219245	-0.96483	0.651748	-0.034613	0.621901	20	212
LUAD	LARP1	12.6148	0.966957	3.75586	0.875643	0.0615526	0.817984	11	221
LUAD	LATS1	-72.1779	0.0011938	7.52748	0.359691	0.244456	0.000659084	11	221
LUAD	FRAS1	-25.492	0.908302	15.9758	0.00648314	0.0834375	0.0121915	18	214
LUAD	MYOM2	-17.8269	0.662143	-7.01725	0.432849	-0.0192531	0.64631	18	214
LUAD	SYCP1	8.62961	0.433809	13.8071	0.141168	0.0786735	0.169093	10	222
LUAD	PCDHA11	-51.5908	0.0255525	5.97194	0.765912	0.10193	0.0411961	13	219
LUAD	PTPRD	-21.4224	0.159288	1.54452	0.342006	0.0758171	0.00877566	38	194
LUAD	CDYL	-21.3408	0.546533	8.76589	0.417889	0.0405088	0.20232	11	221
LUAD	MAP1B	-11.4012	0.412603	13.3051	0.282152	0.116449	0.0544136	12	220
LUAD	CAPN6	-32.194	0.0957621	-9.27532	0.268259	0.0608003	0.522967	14	218
LUAD	SHROOM3	-18.494	0.55247	8.23635	0.327912	0.0837747	0.101748	12	220
LUAD	COL20A1	-24.1014	0.483679	4.35784	0.664736	0.0712436	0.178516	14	218
LUAD	ITIH5	-15.7553	0.255373	-1.27818	0.353831	-0.00713726	0.880645	17	215
LUAD	DMBT1	-31.8561	0.0124187	1.35722	0.913314	0.0929655	0.0187801	17	215
LUAD	PSG8	5.65628	0.160547	1.25316	0.744274	0.00325834	0.611709	16	216
LUAD	OR4P4	11.1861	0.789499	-1.19697	0.843108	0.0194769	0.397044	11	221
LUAD	CAD	-6.24409	0.792732	4.94964	0.763946	-0.0338515	0.727013	17	215
LUAD	C10orf12	-15.1235	0.341468	1.25655	0.621521	0.0678153	0.462629	10	222
LUAD	PRSS1	-10.7988	0.755507	1.14462	0.762231	0.00325834	0.616153	12	220
LUAD	FAM171A1	-9.77197	0.0845685	-7.79928	0.194858	0.0054999	0.641233	12	220
LUAD	PKD1L1	-22.7587	0.210519	-1.89769	0.926101	0.0617576	0.146526	19	213
LUAD	ARID1B	-12.3625	0.695879	26.6638	0.00768609	0.145482	0.00934129	12	220
LUAD	ITGAX	12.1906	0.91583	6.2675	0.38093	0.0528315	0.156116	21	211
LUAD	ABCB1	-9.65258	0.247907	10.1133	0.21965	0.0753237	0.194908	23	209
LUAD	NLRP7	-18.6666	0.423938	3.1207	0.91532	0.0178396	0.443925	13	219
LUAD	ZBBX	59.7959	0.0845685	29.3889	0.188844	0.00192402	0.864972	12	220
LUAD	ATP10D	-37.9866	0.0362364	3.1207	0.642017	0.140072	0.00769862	11	221
LUAD	DNER	-14.8371	0.435644	6.35103	0.718868	0.0861641	0.253558	12	220
LUAD	MUC4	5.11236	0.889347	6.2182	0.882371	0.035697	0.878887	12	220
LUAD	DDI1	-28.9712	0.281458	-5.79921	0.287672	-0.0112757	0.933971	11	221
LUAD	UGT2B11	24.9684	0.1	11.0214	0.33178	-0.0147972	0.555172	10	222
LUAD	AOX1	20.178	0.845338	3.34073	0.486434	0.0905777	0.275295	10	222
LUAD	COL5A1	-42.9066	0.0178497	10.8621	0.218421	0.20741	0.000561355	19	213
LUAD	SLC32A1	6.61975	0.74145	3.34073	0.248679	0.010663	0.471479	10	222
LUAD	ANK2	-12.5598	0.56303	0.366254	0.853438	0.0683285	0.0753204	48	184
LUAD	MXRA5	-24.3944	0.0618252	6.81661	0.154435	0.0731368	0.00160318	37	195
LUAD	ZNF33A	-27.3703	0.362111	9.77158	0.271304	0.0890763	0.0370639	11	221
LUAD	MCF2	-38.7054	0.190977	-0.304162	0.436644	-0.0038108	0.781817	10	222
LUAD	NLRP13	-28.9712	0.500165	1.34688	0.833298	0.0109853	0.710634	19	213
LUAD	TGIF2LX	-18.5489	0.385581	-10.1515	0.126783	-0.0524709	0.698724	13	219
LUAD	ABCA10	0.126426	0.459607	9.7607	0.205863	0.0643289	0.0382573	17	215
LUAD	MYH13	-6.37503	0.847243	10.1133	0.37248	0.0136794	0.380178	19	213
LUAD	PCDHGA2	16.4935	0.107742	15.175	0.0409457	0.0165781	0.336966	20	212
LUAD	CYP11B1	-29.9741	0.486648	8.32733	0.558393	0.104852	0.106451	12	220
LUAD	ZNF536	-21.7661	0.0545707	-0.341299	0.570053	0.0316052	0.250374	46	186
LUAD	PSG7	6.12657	0.977349	0.0500902	0.771639	-0.0100239	0.909579	25	207
LUAD	GABRB3	-2.88883	0.767064	11.1301	0.0932363	0.0486034	0.356336	10	222
LUAD	NRXN3	6.2017	0.642823	2.75184	0.689493	0.0445821	0.387973	19	213
LUAD	FSTL5	-19.3705	0.386515	-6.6954	0.740871	-0.00446862	0.471921	21	211
LUAD	CHRNA4	-21.3278	0.15764	-11.3018	0.125343	-0.0135346	0.775359	11	221
LUAD	CREBBP	-6.37503	0.274007	3.1207	0.946087	0.0570226	0.388043	15	217
LUAD	IQGAP2	-13.5532	0.882371	2.76846	0.585424	0.0335353	0.357098	12	220
LUAD	PRKDC	4.1975	0.832603	-0.0500902	0.681725	-0.00713726	0.387376	25	207
LUAD	DPP10	18.2939	0.660522	3.13678	0.839366	-0.0112757	0.604443	17	215
LUAD	DCAF12L2	-11.5784	0.213358	7.18554	0.125828	0.11576	0.00432322	21	211
LUAD	FAT4	3.04931	0.68341	6.76452	0.331197	0.028978	0.356863	43	189
LUAD	ATM	-16.0601	0.744274	14.925	0.0313863	0.087274	0.0268352	16	216
LUAD	SLC12A5	-5.66093	0.589086	9.97779	0.102418	0.0494691	0.0896893	13	219
LUAD	NLRP10	-49.3352	0.0131283	-9.70537	0.363292	0.117309	0.119317	16	216
LUAD	BRCA1	-28.0232	0.236843	13.3817	0.242361	0.112699	0.0327047	11	221
LUAD	VPS13A	-44.9029	0.0321716	-9.13345	0.0325034	0.0126309	0.932888	14	218
LUAD	KEL	14.1198	0.935592	-11.3018	0.238739	-0.0495773	0.515212	13	219
LUAD	ASTL	-12.1627	0.276265	4.30495	0.520452	0.0842929	0.124821	12	220
LUAD	KIAA0100	-7.28103	0.919343	12.4528	0.50158	-0.0323401	0.740342	11	221
LUAD	YLPM1	14.1198	0.34539	4.1832	0.771835	0.0194769	0.775359	11	221
LUAD	NPHS1	-1.05611	0.26664	3.14529	0.980619	0.128394	0.162135	12	220
LUAD	FAM71B	-17.5092	0.747096	7.81469	0.740881	0.0467357	0.756449	14	218
LUAD	C6	-55.9574	0.0034964	-0.863254	0.785504	0.0935472	0.00661257	16	216
LUAD	OTOF	-21.1394	0.217044	-3.44046	0.405493	0.0543592	0.623501	14	218
LUAD	KIF1A	7.04933	0.881662	-9.89025	0.419025	-0.0516027	0.676813	13	219
LUAD	SLC5A12	-7.68494	0.531329	9.58136	0.846711	0.0801932	0.453102	11	221
LUAD	CD1E	-29.34	0.109355	-4.94952	0.30864	0.0628444	0.375847	12	220
LUAD	PCNT	-42.8536	0.0601179	3.75586	0.938975	0.0591832	0.295425	13	219
LUAD	DLGAP1	-10.4955	0.607977	0.630674	0.978866	0.00627462	0.631763	10	222
LUAD	MYCBP2	-13.0181	0.742763	1.74216	0.686867	0.0393616	0.434655	19	213
LUAD	CTNNA2	-4.86901	0.546014	9.97779	0.514002	0.0319189	0.365139	31	201
LUAD	SGIP1	-32.3282	0.0565308	-2.72461	0.513654	0.0319189	0.256945	17	215
LUAD	EPHA7	-38.6121	0.00130027	2.42626	0.908302	0.116747	0.013103	18	214
LUAD	OR2T4	-32.4271	0.108044	-6.1483	0.350178	0.0668507	0.465709	18	214
LUAD	ABCB11	-72.1779	6.05e-05	-11.5535	0.19455	0.0917137	0.0168339	13	219
LUAD	PPRC1	25.3296	0.339029	10.4919	0.35383	0.00646181	0.708938	10	222
LUAD	ANKRD17	-19.1607	0.92545	14.924	0.498873	0.10193	0.193091	13	219
LUAD	NOTCH4	12.6254	0.468096	9.95092	0.0799707	0.0432477	0.235557	25	207
LUAD	TRPC4	-33.0445	0.0259113	-0.83146	0.711434	0.0426527	0.222022	15	217
LUAD	ACSM5	-6.97084	0.481292	16.3295	0.0305176	0.250637	0.00265044	11	221
LUAD	DAB2	-14.8264	0.237022	3.34367	0.568161	0.0507858	0.176682	10	222
LUAD	CASP5	-0.714843	0.998078	6.44111	0.4597	0.0713828	0.356336	10	222
LUAD	MED1	-48.6385	0.147792	-0.482431	0.329386	-0.0366197	0.856665	10	222
LUAD	NELL2	4.62158	0.814452	21.2794	0.015082	0.117666	0.0649395	15	217
LUAD	CD109	5.65628	0.718868	11.2019	0.561366	0.0303772	0.373471	12	220
LUAD	FLG	-31.4475	0.0436629	-2.38135	0.792762	0.0258664	0.0904086	54	178
LUAD	TLR7	-19.263	0.543475	-1.14343	0.531329	0.0378148	0.72648	11	221
LUAD	SERPINI2	-7.68494	0.275335	1.73182	0.467079	0.0194769	0.207251	11	221
LUAD	PKP2	-18.6666	0.311246	-6.11496	0.832319	0.0560795	0.231415	11	221
LUAD	LGR6	-33.3279	0.0642678	3.75586	0.338376	0.0825295	0.404787	11	221
LUAD	KLHL1	-44.0025	0.00495344	-10.9136	0.140102	0.0664414	0.143073	18	214
LUAD	F13A1	-5.05437	0.861154	-5.98617	0.775359	-0.0105055	0.846711	11	221
LUAD	OR8U1	-32.2891	0.0693258	-2.24301	0.96459	0.0530735	0.169954	16	216
LUAD	COL28A1	-60.9163	0.0779233	9.19642	0.331455	0.176511	0.0143381	11	221
LUAD	MYLK	-5.36713	0.902248	4.31849	0.591236	0.0562169	0.42537	10	222
LUAD	KCNJ3	22.1758	0.357211	-9.10926	0.173586	-0.0611399	0.0988824	16	216
LUAD	DYNC2H1	-20.7899	0.125919	3.50564	0.866846	0.163719	0.0774228	19	213
LUAD	CCDC73	-1.17463	0.732122	18.6079	0.134889	0.0727339	0.107412	12	220
LUAD	OR6K2	-25.6707	0.0367675	15.3204	0.0446938	0.182812	0.000535919	13	219
LUAD	SLC4A3	-18.1554	0.648991	9.61592	0.37939	0.0423652	0.229468	10	222
LUAD	OR5L2	-15.3769	0.0786819	-3.35555	0.363292	0.0147651	0.571706	16	216
LUAD	PDE3A	-54.8435	0.00167147	-13.754	0.0062413	0.0467244	0.419025	13	219
LUAD	IGSF10	-25.2094	0.488823	11.1708	0.128014	0.092768	0.0296199	14	218
LUAD	CHRM3	19.7988	0.615751	6.53623	0.349422	0.00177455	0.62777	13	219
LUAD	COL25A1	-18.9764	0.594708	13.3278	0.0677843	0.0839325	0.0481144	18	214
LUAD	TPTE	-18.6666	0.18103	8.76589	0.435856	0.108352	0.0115071	25	207
LUAD	INSRR	1.41242	0.9068	10.7681	0.345802	0.00772696	0.358558	14	218
LUAD	MMRN1	18.2939	0.824724	5.33458	0.724197	-0.0105055	0.243038	17	215
LUAD	TRPM2	13.9756	0.98655	5.65326	0.940488	-0.00765458	0.871814	10	222
LUAD	MIA2	-6.94783	0.319922	4.98227	0.807823	0.126311	0.167605	10	222
LUAD	TRAPPC9	-13.0181	0.484163	16.98	0.273314	0.114972	0.175986	11	221
LUAD	C1orf94	2.01011	0.939422	2.42626	0.574982	0.03582	0.303465	14	218
LUAD	SLC5A7	-42.681	0.0252675	-1.97276	0.948155	0.111114	0.113595	10	222
LUAD	POLR3A	-20.3241	0.329169	-5.98617	0.281458	0.0232881	0.977968	11	221
LUAD	GPR149	17.8947	0.826531	3.34073	0.902248	-0.0472389	0.925171	10	222
LUAD	HERC2	-19.0354	0.498289	3.28587	0.968368	0.0345876	0.329004	27	205
LUAD	TRPC5	-13.9436	0.791446	17.8086	0.0372827	0.10198	0.0417172	16	216
LUAD	SH2D3C	25.6391	0.179788	-3.72002	0.483423	-0.0786869	0.170591	10	222
LUAD	CDH17	-13.3048	0.603776	-0.723292	0.79611	0.0298338	0.619264	12	220
LUAD	HCN1	-11.4184	0.260248	6.88908	0.377942	0.0655735	0.0808594	24	208
LUAD	SKIV2L2	27.6558	0.607977	-12.4579	0.160312	-0.0821758	0.0606489	10	222
LUAD	GRM1	9.4073	0.566912	12.234	0.423917	0.027766	0.262641	22	210
LUAD	PCDHA12	-49.735	0.140781	-0.776731	0.988983	0.0499448	0.255586	11	221
LUAD	CASP8AP2	-4.16382	0.868447	-3.80824	0.837273	-0.0306893	0.514735	12	220
LUAD	PLA2G4A	-8.19194	0.650747	12.2946	0.0937016	0.0869151	0.024991	12	220
LUAD	DNAH8	7.70448	0.820547	-2.49376	0.897791	-0.0135346	0.549483	35	197
LUAD	SMARCA2	-34.0317	0.0802813	21.6423	0.240512	0.129092	0.0201039	11	221
LUAD	TECRL	-9.56829	0.204142	8.61776	0.148034	0.0809986	0.0349414	12	220
LUAD	CYP4F8	-67.1981	0.00159125	-1.57992	0.34539	0.0617576	0.0818852	11	221
LUAD	CDH7	-6.1747	0.644231	6.453	0.500064	0.0499766	0.15453	20	212
LUAD	KIAA1210	-4.15491	0.985311	8.76589	0.793045	0.0232881	0.977968	11	221
LUAD	ANKRD33	6.1995	0.495738	5.33458	0.197475	0.0861584	0.106186	11	221
LUAD	PLCB1	6.44941	0.946844	4.05926	0.263616	0.0240638	0.229514	26	206
LUAD	LRP1	20.8857	0.123792	-0.894758	0.871768	-0.031561	0.508827	17	215
LUAD	MNDA	-24.717	0.324627	9.58136	0.516344	0.107144	0.18194	11	221
LUAD	HRNR	-31.1004	0.0560614	-0.0500902	0.902031	0.0630094	0.0820811	41	191
LUAD	DNAH3	-9.65258	0.238057	3.1207	0.513742	0.0587242	0.0631526	25	207
LUAD	ZZEF1	-26.3492	0.0868444	-7.82905	0.366471	0.0677223	0.406056	10	222
LUAD	ACTN2	18.7314	0.719265	14.136	0.206524	0.0303227	0.209491	14	218
LUAD	ALMS1	-5.05437	0.740871	9.63022	0.10246	0.0617576	0.202285	21	211
LUAD	KCNA4	-17.7012	0.4822	10.1133	0.0848828	0.14748	0.00431885	19	213
LUAD	CASR	-46.2295	0.00781712	-1.27332	0.988529	0.107091	0.00851057	14	218
LUAD	DCAF8L1	-59.1092	0.000847138	10.7301	0.227046	0.219559	0.000513073	12	220
LUAD	OLFM4	0.269284	0.819035	-4.38589	0.442345	-0.0662422	0.358853	10	222
LUAD	CACNA1C	14.6776	0.38993	3.85188	0.488433	-0.0332034	0.996004	22	210
LUAD	PCDHA2	-10.928	0.892839	4.58085	0.748801	0.0455413	0.352504	12	220
LUAD	DACT1	-11.0277	0.655936	5.09725	0.868022	-0.0523872	0.883207	10	222
LUAD	ZNF676	-59.0639	0.0051259	-3.42082	0.421057	0.0890763	0.0428563	21	211
LUAD	LRRC32	-50.118	0.0289398	5.65783	0.669915	0.125621	0.0225699	10	222
LUAD	NCAN	10.6856	0.821562	-11.3018	0.0902989	-0.117949	0.144543	11	221
LUAD	LUM	-9.2746	0.767064	10.3883	0.680475	0.0600759	0.621521	10	222
LUAD	EP400	-5.66093	0.811741	-0.614371	0.878307	0.0643289	0.360483	13	219
LUAD	PCK1	9.43458	0.988983	6.72581	0.397044	0.0194769	0.628889	11	221
LUAD	PIK3CA	38.565	0.448506	0.541847	0.995084	0.000985666	0.716194	14	218
LUAD	LILRA1	0.269284	0.768972	-1.81542	0.276265	-0.0271604	0.255399	12	220
LUAD	DOCK2	-27.7486	0.0330759	0.25771	0.542741	0.0991005	0.00311006	24	208
LUAD	TRPS1	-2.19419	0.450709	-0.0500902	0.790085	0.00403344	0.602667	29	203
LUAD	RAG1	10.5018	0.931365	-1.38735	0.892839	0.142721	0.22875	12	220
LUAD	RP1	-36.6753	0.0322992	4.4825	0.23996	0.101684	0.0034669	23	209
LUAD	CYP4F3	-11.8605	0.944321	15.5342	0.568161	-0.0191707	0.998078	10	222
LUAD	SCN8A	-18.6666	0.291516	-2.20868	0.888378	0.0468005	0.285719	13	219
LUAD	KCNK10	-37.3218	0.0104538	-1.89769	0.969465	0.143296	0.00657147	13	219
LUAD	ADAMTS1	-29.7953	0.419025	-0.83146	0.972857	0.0436869	0.183103	13	219
LUAD	DNAH17	-52.3882	0.0142373	-12.9329	0.0575101	0.0345876	0.243038	17	215
LUAD	CACNA2D3	-32.9566	0.341185	2.11359	0.585424	0.0628444	0.327912	12	220
LUAD	NETO1	-12.8727	0.829249	7.41775	0.266487	0.0220371	0.335395	14	218
LUAD	OR5L1	-27.6798	0.119743	3.59199	0.969374	0.0468859	0.203855	18	214
LUAD	PREX2	-51.2738	0.0191165	-9.21975	0.129822	0.0693659	0.395258	10	222
LUAD	CFH	-24.717	0.0857467	-6.86986	0.806094	0.107773	0.103902	21	211
LUAD	MYO18B	-18.6666	0.261407	6.44684	0.754801	0.0890763	0.172937	25	207
LUAD	PTCHD2	-29.8464	0.162861	7.8027	0.641809	0.080734	0.0478807	16	216
LUAD	SNTG1	-17.5941	0.28742	10.1133	0.161232	0.0643289	0.0473034	23	209
LUAD	SLCO5A1	14.0503	0.498095	0.455925	0.839395	-0.0471406	0.666884	16	216
LUAD	GLI3	2.19011	0.562211	11.1708	0.21991	0.0211796	0.589653	18	214
LUAD	OR5I1	-64.6045	0.0033186	-8.04833	0.171617	0.0499448	0.114393	11	221
LUAD	LILRB5	-39.9749	0.0134475	-6.75154	0.409998	0.0587736	0.197475	11	221
LUAD	ANKHD1	-5.66093	0.507008	6.42282	0.517961	0.016348	0.266959	13	219
LUAD	FAM47B	-20.9205	0.469445	15.1793	0.137268	0.0440557	0.0944027	23	209
LUAD	CD1B	24.5214	0.204384	15.9642	0.0816515	-0.0496418	0.906063	10	222
LUAD	COL15A1	-8.20411	0.667722	16.5676	0.139731	0.0628444	0.288284	14	218
LUAD	C5orf42	23.6785	0.222088	-12.8666	0.734183	-0.0496791	0.642077	10	222
LUAD	PCDHGA3	0.126426	0.780673	9.38663	0.245438	0.0699462	0.120825	15	217
LUAD	OR2L13	-17.38	0.239805	7.54156	0.473934	0.0817912	0.049648	16	216
LUAD	POLE	-28.075	0.125663	-4.29253	0.118931	0.0234292	0.876717	15	217
LUAD	SYNE2	-11.0419	0.193114	-0.949777	0.718212	0.0614422	0.292355	29	203
LUAD	SOX5	-5.05437	0.890175	-2.99574	0.879272	-0.00177455	0.853926	11	221
LUAD	MMP2	-11.1698	0.80186	5.78668	0.938975	0.00177455	0.517961	13	219
LUAD	ZNF318	6.0604	0.811556	-12.1551	0.301534	-0.0435197	0.507794	10	222
LUAD	ATP7B	-23.6463	0.619264	2.57024	0.669945	-0.00155762	0.889347	12	220
LUAD	OR2AK2	22.8004	0.170242	13.2373	0.0306152	0.0438046	0.177227	12	220
LUAD	OR2C3	22.1416	0.468519	23.7304	0.202671	0.0331256	0.369033	10	222
LUAD	SVEP1	10.6856	0.804846	6.90683	0.289836	-0.0400306	0.578779	27	205
LUAD	SETX	7.78058	0.759718	-4.21703	0.618122	-0.0415273	0.480422	10	222
LUAD	STAG3	5.73843	0.898435	0.577004	0.875609	-0.00984568	0.826531	10	222
LUAD	KIF26B	-8.38874	0.269304	3.1207	0.642017	0.140072	0.0549389	11	221
LUAD	MPDZ	-5.1995	0.712526	12.3077	0.315258	0.0576255	0.395258	10	222
LUAD	OR2T1	-5.66093	0.952421	8.8089	0.286407	0.0109853	0.605081	15	217
LUAD	PRKCG	-24.7059	0.213103	4.77669	0.477431	0.102044	0.103016	10	222
LUAD	CAMTA1	-24.0132	0.274007	6.54253	0.735281	0.0468005	0.498903	15	217
LUAD	SIM1	-53.6158	0.00143885	1.85819	0.644398	0.175894	0.0247067	12	220
LUAD	GRID2	7.70448	1	6.35689	0.277991	0.0405088	0.162592	17	215
LUAD	HEATR1	7.8792	0.923945	9.01686	0.370791	0.0643289	0.21166	15	217
LUAD	DYNC1H1	-8.34146	0.375235	-10.2857	0.401371	0.0054999	0.562211	18	214
LUAD	OR8H2	-43.1685	0.00649889	-9.5637	0.270039	0.052749	0.147607	14	218
LUSC	RYR2	-29.7687	0.375236	4.54204	0.417548	0.055594	0.264486	11	22
LUSC	CSMD3	2.19342	0.644695	-14.5462	0.141059	-0.11963	0.0197178	12	21
LUSC	ZNF804B	-0.361739	0.576001	-4.22606	0.363347	-0.00638699	0.77267	10	23
LUSC	TP53	-10.6204	0.714961	13.0755	0.714961	0.0892839	0.448175	28	5
LUSC	FAM135B	-24.5702	0.190779	4.20124	0.720944	0.0804765	0.0755045	11	22
LUSC	PKHD1L1	2.19342	0.592562	2.51931	0.955917	-0.0284997	0.868269	12	21
LUSC	ZFHX4	-20.377	0.37192	5.33496	0.206858	0.0254283	0.265292	13	20
LUSC	TTN	-20.8874	0.476058	14.4763	0.650931	0.0310767	0.476058	26	7
LUSC	MUC16	-3.95926	0.789843	9.15812	0.344531	0.0621246	0.203901	17	16
LUSC	COL11A1	-29.3231	0.549869	5.3686	0.428325	0.0332155	0.657592	10	23
LUSC	SI	-28.3831	0.405974	-4.88435	0.602684	-0.026294	0.549869	10	23
LUSC	USH2A	31.6036	0.101727	3.2341	0.382453	-0.00740229	0.708972	16	17
LUSC	LRP1B	25.6397	0.37192	7.30689	0.249746	-0.00826303	0.785337	13	20
STAD	PTPRD	10.0726	0.96452	-2.24068	0.546819	-0.00948977	0.849261	13	112
STAD	NOTCH1	-10.6814	0.607135	6.69635	0.425871	0.050166	0.293219	10	115
STAD	CSMD1	12.7422	0.698115	4.08927	0.702503	-0.00751996	0.724586	28	97
STAD	ADAMTS9	47.0789	0.00575523	10.3346	0.192512	-0.0183312	0.29677	12	113
STAD	HIVEP3	-3.528	0.851372	1.19084	0.797112	0.0294387	0.885663	11	114
STAD	CACNA1A	27.6713	0.51056	-2.24068	0.634819	0.0330032	0.737234	11	114
STAD	TLR4	-1.34105	0.520243	10.9698	0.329775	0.0552663	0.444696	13	112
STAD	KCNB2	12.4644	0.619918	-0.57765	0.99637	0.00696932	0.719249	10	115
STAD	FAT2	11.8762	0.433002	2.31162	0.64509	0.0282819	0.600361	18	107
STAD	FRY	33.918	0.0404564	3.49886	0.394974	-0.0516146	0.418671	12	113
STAD	CAMTA2	29.1541	0.119806	-2.44602	0.591987	-0.0690526	0.132762	11	114
STAD	VCAN	36.4898	0.24662	7.10483	0.125801	0.0166248	0.520888	15	110
STAD	KDM4B	32.2295	0.0879505	17.9329	0.384803	-0.0183312	0.469388	10	115
STAD	PTPN13	35.6412	0.394974	-2.81034	0.896646	-0.0426476	0.753314	12	113
STAD	MUC4	-5.49174	0.868316	6.20921	0.798907	0.0559322	0.938756	13	112
STAD	FCGBP	35.2499	0.468115	7.07176	0.816756	0.0327032	0.822662	15	110
STAD	FLG	20.0286	0.571724	-1.44154	0.955138	-0.00156501	0.633583	28	97
STAD	PREX2	30.2549	0.0839162	-0.227878	0.65672	-0.0584847	0.214174	15	110
STAD	PTPRM	28.7773	0.181318	-2.50292	0.549031	-0.0344808	0.173246	12	113
STAD	HECW2	39.8534	0.0384222	6.69635	0.268861	-0.0209839	0.588185	10	115
STAD	PCLO	6.87835	0.812674	12.3969	0.036011	0.0328984	0.389283	27	98
STAD	TRIP12	39.3948	0.0447902	14.4856	0.144125	0.0358197	0.788346	10	115
STAD	NRXN3	28.3998	0.641361	4.85366	0.325864	0.0218749	0.95318	14	111
STAD	RGS22	41.183	0.139634	-3.12036	0.954827	0.0294387	0.56223	11	114
STAD	APC	33.0407	0.381312	1.09161	0.46673	-0.0155687	0.90206	18	107
STAD	SALL1	26.1511	0.678827	13.3962	0.474995	0.0198622	0.698931	10	115
STAD	YLPM1	28.8564	0.300667	9.45946	0.170615	0.0282819	0.996657	12	113
STAD	TPTE	-31.5963	0.624625	16.934	0.00976567	0.107876	0.0694184	13	112
STAD	RXFP3	-9.25877	0.759687	-0.93629	0.583054	0.0464421	0.308562	12	113
STAD	FCRL3	28.47	0.885663	7.39057	0.096881	0.0599889	0.192623	11	114
STAD	HYDIN	38.61	0.155458	6.9082	0.256136	0.00127292	0.857009	12	113
STAD	FLNA	33.3254	0.816493	1.50411	0.497789	0.0442507	0.753551	10	115
STAD	SDK1	32.0118	0.197055	3.09933	0.259221	0.00331461	0.919474	13	112
STAD	SRCAP	35.2499	0.0427682	0.72687	0.798907	-0.0418123	0.214436	13	112
STAD	TOP2A	1.83765	0.873468	-1.82795	0.802387	0.0278303	0.960081	10	115
STAD	LRP1	33.8255	0.148274	10.5438	0.473657	-0.0183312	0.42838	12	113
STAD	FBN3	35.2499	0.504976	0.72687	0.445736	0.0399208	0.666191	11	114
STAD	DYNC1H1	28.5219	0.280273	14.2853	0.425661	0.0166248	0.700856	13	112
STAD	CSPG4	29.1541	0.100437	-0.816139	0.790393	-0.0537395	0.154196	11	114
STAD	RBM6	-5.25985	0.357881	-3.12036	0.604089	-0.00680012	0.241142	11	114
STAD	PCDHB12	2.69516	0.802387	5.49997	0.399912	0.0464421	0.227898	10	115
STAD	DHX36	-6.74131	0.753551	-14.6058	0.0896572	-0.0631895	0.217541	10	115
STAD	CTNNB1	-4.9981	0.493905	4.9944	0.281804	0.0327032	0.968718	11	114
STAD	PAPPA2	30.5555	0.632816	21.9333	0.114358	0.0976867	0.245931	10	115
STAD	BRWD1	-5.87539	0.705681	3.42612	0.816493	0.0286266	0.685504	10	115
STAD	NBEA	28.449	0.431675	-0.153835	0.608075	0.0206775	0.8583	15	110
STAD	PCDH17	-28.1953	0.389051	11.486	0.158155	0.040713	0.135652	13	112
STAD	VPS13A	41.4534	0.0178639	-1.60459	0.78737	-0.0598	0.112941	16	109
STAD	TRANK1	-1.83546	0.836606	0.381713	0.817704	0.00380685	0.932324	13	112
STAD	ZFHX4	-5.49174	0.943414	6.43758	0.177462	0.0344363	0.457032	25	100
STAD	WNK1	35.6412	0.0862702	-2.31686	0.652375	-0.0560902	0.0931505	10	115
STAD	WDR7	27.6713	0.610181	-2.03601	0.704619	0.0215806	0.579997	11	114
STAD	WBSCR17	37.7621	0.141984	-2.24068	0.737234	-0.0507861	0.659867	11	114
STAD	FBN1	-1.83546	0.81736	-2.61347	0.704619	-0.0079053	0.892549	11	114
STAD	NLRC5	-5.75944	0.916651	-2.31686	0.844879	-0.0285721	0.866303	10	115
STAD	THSD7B	-3.528	0.851372	-0.227878	0.85821	0.0294387	0.98957	11	114
STAD	ZNF831	12.7422	0.464189	4.95082	0.934488	0.00583971	0.613601	14	111
STAD	TAF1L	42.5596	0.201234	6.76105	0.537911	0.000613861	0.516017	12	113
STAD	KDM3B	29.6267	0.0680594	-2.31686	0.767413	-0.0560902	0.125177	10	115
STAD	PXDNL	-7.2953	0.924341	7.07176	0.359938	0.0166248	0.673277	15	110
STAD	ADAMTS5	-8.89272	0.499424	25.1699	0.0148596	0.059323	0.0719234	11	114
STAD	DLGAP4	-5.25985	0.803847	-3.49792	0.622447	0.0220728	0.698158	11	114
STAD	ZC3H13	34.8092	0.101336	-8.35621	0.453216	-0.0348484	0.204205	12	113
STAD	UNC13B	29.5718	0.420602	0.449172	0.931106	-0.0122205	0.626353	10	115
STAD	DOPEY1	28.0951	0.399912	17.9329	0.176568	0.0467092	0.503576	10	115
STAD	PAPPA	33.4179	0.436524	3.35133	0.374928	-0.0321123	0.902223	10	115
STAD	TMEM132D	-8.66082	0.972727	-3.3257	0.388522	-0.0397226	0.409761	15	110
STAD	ACAN	4.66639	0.967335	26.6487	0.0195836	0.146505	0.204265	10	115
STAD	MED12L	31.4591	0.473657	10.1437	0.489314	0.0282819	0.8834	12	113
STAD	ADAMTS16	18.9513	0.489314	6.66516	0.494595	0.050766	0.641843	12	113
STAD	ACACA	13.5884	0.774373	17.9329	0.0931505	0.0458352	0.136777	10	115
STAD	TNRC6A	31.4591	0.571604	-3.83142	0.896646	-0.0137845	0.69676	12	113
STAD	FLNC	-3.528	0.450952	-2.03601	0.996523	-0.00581564	0.579997	11	114
STAD	LAMA2	32.61	0.503576	-12.0846	0.28906	-0.0338282	0.370049	10	115
STAD	GRIA1	33.3006	0.253417	-0.146739	0.503576	0.00581564	0.866303	10	115
STAD	CENPF	28.7324	0.337865	11.5466	0.208523	0.024845	0.990321	13	112
STAD	TCHH	-3.528	0.370902	8.41426	0.196704	0.0351949	0.674977	21	104
STAD	MTOR	35.7653	0.0531356	-2.31686	0.379846	-0.0728776	0.0164879	10	115
STAD	RIMS1	12.5803	0.529112	-0.140295	0.890933	0.0232041	0.841159	18	107
STAD	ACACB	23.314	0.214165	1.68003	0.760472	-0.00985547	0.497789	10	115
STAD	LRRC4B	29.9925	0.488419	-2.24134	0.770328	-0.0519006	0.430294	11	114
STAD	SND1	6.87835	0.666191	-13.3331	0.224095	-0.0513787	0.293658	11	114
STAD	PGM5	35.4604	0.0427682	0.435355	0.817704	-0.0542615	0.170417	13	112
STAD	TLN2	-2.99048	0.652609	-3.18518	0.528566	-0.0383925	0.538859	14	111
STAD	MUC6	44.0042	0.00300346	-1.70991	0.968718	-0.125428	0.0159684	11	114
STAD	MYCBP2	10.7963	0.844545	-10.9751	0.410197	-0.00581564	0.892549	11	114
STAD	SLITRK5	41.3935	0.0745316	1.32836	0.881063	-0.0675047	0.170417	13	112
STAD	CDH20	-5.25985	0.454393	-3.70325	0.186056	-0.0573702	0.115706	13	112
STAD	TP53	-48.0645	0.00443999	5.86696	0.0327051	0.0766819	0.000794655	53	72
STAD	ATR	34.4257	0.268861	-5.09669	0.626353	0.00336185	0.305937	10	115
STAD	MYH11	14.749	0.415371	1.05911	0.746649	-0.00329326	0.581929	10	115
STAD	VWF	-5.49174	0.516176	7.39057	0.335556	0.060219	0.211091	11	114
STAD	TRIOBP	41.183	0.144365	-2.61347	0.81736	-0.0149858	0.533214	11	114
STAD	CACNA1C	39.2114	0.0355187	0.106199	0.612716	-0.00763766	0.38523	16	109
STAD	SULF1	29.1541	0.126154	-5.94602	0.314147	-0.0139842	0.132762	11	114
STAD	RP1	-29.8606	0.147813	1.19084	0.54585	0.024845	0.13349	15	110
STAD	SPG20	10.0726	0.533214	5.09507	0.810597	-0.0112782	0.653568	11	114
STAD	DNAH17	13.9028	0.565919	0.532055	0.817729	-0.0124815	0.532394	12	113
STAD	PKD1	32.61	0.594471	6.2776	0.931106	-0.0158533	0.632816	10	115
STAD	ASH1L	37.7347	0.151692	-2.08782	0.878786	-0.00581564	0.488419	11	114
STAD	INPPL1	37.5516	0.16791	5.09507	0.855604	0.0171171	0.474139	13	112
STAD	RICTOR	29.5718	0.685504	2.59479	0.600788	0.025804	0.665549	10	115
STAD	SACS	18.8964	0.506357	2.89988	0.610179	0.0218749	0.974756	18	107
STAD	TTC3	-8.66082	0.521824	-13.5057	0.105966	-0.00740011	0.797112	11	114
STAD	KRAS	27.6713	0.616301	-5.5681	0.934018	-0.00581564	0.810597	11	114
STAD	THSD1	27.6713	0.201703	1.19084	0.871917	-0.0507861	0.357881	11	114
STAD	CPS1	29.1314	0.322601	1.04568	0.69172	-0.011007	0.610181	11	114
STAD	CHD6	39.3151	0.473657	1.86384	0.727994	0.0244374	0.870186	12	113
STAD	LRP1B	28.4555	0.599617	-2.64591	0.423175	-0.00581564	0.538593	27	98
STAD	INO80	37.4997	0.0986464	-2.40813	0.499424	-0.0778413	0.0474107	11	114
STAD	EVPL	14.3039	0.431178	-5.84632	0.53304	-0.0598	0.234995	10	115
STAD	SPTAN1	33.7464	0.217541	-5.7626	0.469388	-0.114932	0.165199	10	115
STAD	BAI3	-5.25985	0.803847	0.72687	0.94095	-0.0420835	0.678909	11	114
STAD	NCOR1	31.0556	0.363194	10.6305	0.245758	0.00583971	0.753314	12	113
STAD	MGA	7.33234	0.653568	-3.3257	0.724127	0.00331461	0.830927	11	114
STAD	CIC	30.0444	0.344376	2.78051	0.579997	0.0198893	0.892549	11	114
STAD	HERC2	31.8362	0.113902	-2.03601	0.523864	0.00380685	0.859936	17	108
STAD	TTN	3.72447	0.481653	2.061	0.27191	0.00976096	0.640766	62	63
STAD	GRID2	39.7609	0.0290249	-2.15381	0.766076	-0.0949355	0.0513562	12	113
STAD	ATM	29.5718	0.173246	-14.7027	0.0658353	-0.0652211	0.0249735	12	113
STAD	PTPRG	41.4534	0.0266965	-0.723408	0.698931	-0.0651282	0.0589836	10	115
STAD	BCLAF1	14.749	0.989109	4.33968	0.253417	0.0325107	0.425871	10	115
STAD	XIRP2	-32.1687	0.131277	11.9935	0.0537567	0.0793568	0.00474652	25	100
STAD	KCNH8	39.5824	0.245931	-3.10146	0.739767	-0.0513536	0.458284	10	115
STAD	PDE4DIP	39.5092	0.0535666	15.6219	0.201703	0.0166248	0.47216	11	114
STAD	SLITRK2	-10.3075	0.619918	15.0987	0.0313797	0.0862687	0.204265	10	115
STAD	FAT1	8.42151	0.594471	11.2188	0.210827	0.0292663	0.685504	10	115
STAD	PTPRJ	44.5023	0.0145679	0.449172	0.824247	-0.0557939	0.108519	12	113
STAD	HFM1	24.5906	0.0798064	-0.731805	0.887827	-0.0557939	0.0896572	10	115
STAD	EP300	-3.528	0.544729	-0.816139	0.574045	0.0166248	0.892549	11	114
STAD	OBSCN	32.0193	0.0457534	2.09457	0.463948	-0.053147	0.3007	19	106
STAD	DNAH9	28.3998	0.409961	6.69635	0.32387	0.0228594	0.64418	16	109
STAD	COL5A1	24.0906	0.956558	6.6884	0.32066	0.0024908	0.543457	12	113
STAD	DNAH7	10.7963	0.687476	-2.03601	0.50695	0.0334954	0.667349	19	106
STAD	TUSC3	-14.7993	0.326882	-3.70325	0.685303	0.0527975	0.521824	11	114
STAD	HMCN1	-9.14568	0.472383	7.96738	0.211991	0.061866	0.126004	19	106
STAD	MEGF8	-3.528	0.622447	-2.44602	0.550532	-0.0537395	0.24821	11	114
STAD	COL6A3	33.3803	0.213066	-3.10205	0.453216	-0.0634858	0.247476	16	109
STAD	ITPR2	14.749	0.280861	-2.40058	0.952831	-0.0116993	0.463817	10	115
STAD	PCDH11X	-40.1271	0.543457	6.9082	0.245758	0.0968827	0.242365	12	113
STAD	MYO15A	-3.528	0.743816	-3.3257	0.783688	0.0220728	0.878786	11	114
STAD	DIP2C	46.74	0.020065	9.55545	0.242246	-0.079007	0.217541	10	115
STAD	CACNA1I	29.5604	0.305937	1.77837	0.692206	-0.0497049	0.36521	10	115
STAD	BSN	12.7422	0.787096	6.72557	0.445296	0.0470421	0.478646	14	111
STAD	TRPS1	18.8964	0.565023	17.0673	0.179404	0.00272096	0.990631	14	111
STAD	USH2A	-32.2336	0.250883	15.9059	0.0444096	0.0671725	0.0353362	20	105
STAD	SIPA1L2	-1.83546	0.694871	-2.78604	0.350238	0.00331461	0.40255	13	112
STAD	SVIL	13.7989	0.537911	-0.237595	0.678259	-0.0347704	0.390334	12	113
STAD	PKHD1	33.1441	0.0304194	2.93199	0.278254	-0.0455256	0.261271	14	111
STAD	COL14A1	37.9471	0.13053	0.729485	0.724127	-0.053147	0.348841	11	114
STAD	CACNA1D	42.2987	0.110242	18.5212	0.185471	-0.0183312	0.639308	10	115
STAD	WDFY3	40.6344	0.0365315	4.97949	0.324761	-0.0513536	0.345774	12	113
STAD	FSTL5	29.1541	0.255422	20.3868	0.0100177	0.0327032	0.425217	11	114
STAD	BCOR	38.4526	0.101336	3.08378	0.791788	-0.0670189	0.18407	12	113
STAD	ELMO1	45.9907	0.0589836	0.983537	0.569512	-0.0127994	0.355652	10	115
STAD	SYNE1	-5.75944	0.796874	11.2053	0.0113568	0.0572945	0.130214	32	93
STAD	TPO	31.8253	0.551128	1.06427	0.719249	-0.079007	0.551128	10	115
STAD	SI	-1.46937	0.568123	10.651	0.51056	0.0327032	0.435407	11	114
STAD	XRN1	29.1541	0.321462	2.78051	0.608075	0.0171171	0.912281	15	110
STAD	DMD	27.6713	0.55894	7.55171	0.26301	0.024845	0.850718	21	104
STAD	DNAH2	34.4257	0.453216	0.145294	0.600426	0.0282819	0.896646	12	113
STAD	BRCA2	28.0951	0.410179	11.132	0.197852	0.0464421	0.626353	10	115
STAD	SYTL2	29.1541	0.255822	2.78051	0.557635	-0.00881231	0.63612	13	112
STAD	IBTK	36.4898	0.0345721	-2.03601	0.871917	-0.0537395	0.237661	11	114
STAD	DNAH8	31.9134	0.175091	1.35324	0.546996	0.00415409	0.78169	16	109
STAD	KIAA1109	28.4112	0.320556	13.6133	0.0737808	0.0228594	0.718632	20	105
STAD	CHD4	31.7639	0.405261	-5.76873	0.544729	0.00380685	0.527503	11	114
STAD	COL6A2	46.74	0.00624476	4.98643	0.515258	-0.079007	0.0862702	10	115
STAD	CCDC66	27.6713	0.851372	3.09933	0.659867	-0.0507861	0.899444	11	114
STAD	DNAH11	-20.5357	0.416681	-0.679987	0.759688	0.00663195	0.6603	18	107
STAD	ASTN2	-0.581644	0.588818	-6.44121	0.162904	-0.0574349	0.116098	12	113
STAD	COL4A1	29.0794	0.624625	-2.03601	0.945192	-0.0420835	0.630362	13	112
STAD	COL6A6	13.9878	1	14.7522	0.305937	0.0535753	0.238601	10	115
STAD	NEB	27.6713	0.405487	14.2853	0.101314	0.0257859	0.631974	17	108
STAD	ERBB2	29.1153	0.350932	-2.91268	0.639308	-0.0500012	0.227898	10	115
STAD	GRM5	-31.6989	0.341958	6.36472	0.444696	0.0609297	0.123388	13	112
STAD	CELSR2	31.4591	0.173246	2.42202	0.433283	0.0248857	1	12	113
STAD	CDH8	35.1411	0.581929	1.50411	0.767413	0.025804	0.726067	10	115
STAD	ASXL3	36.4282	0.226468	10.6608	0.436016	0.00272096	0.630194	14	111
STAD	ITPR3	31.1012	0.0557814	-2.03601	0.80516	-0.0573702	0.239292	13	112
STAD	CCDC88A	29.1541	0.242536	-2.24068	0.855604	0.0198893	0.682959	13	112
STAD	GOLGA4	-30.4348	0.604089	2.41338	0.367067	-0.0237948	0.440554	11	114
STAD	DCHS1	45.9358	0.191588	3.96247	0.458284	-0.0183312	0.665549	10	115
STAD	CACNA1E	29.1541	0.269724	5.99069	0.0995678	0.0351424	0.288036	19	106
STAD	ZNF804A	-5.87539	0.577315	6.10809	0.367633	0.0464421	0.571604	12	113
STAD	XYLT2	32.6746	0.0520262	-1.60459	0.581929	-0.0969913	0.0367507	10	115
STAD	UBR5	29.1541	0.466807	6.68354	0.297682	0.0293339	0.672538	11	114
STAD	LRRK2	-13.951	0.770522	-3.49828	0.124126	-0.0586853	0.156997	17	108
STAD	DLC1	-40.6126	0.0367507	17.5285	0.173673	0.235624	0.0124883	10	115
STAD	RNF43	27.7232	0.684405	-3.12036	0.624112	0.0166248	0.712521	15	110
STAD	EPHA5	-22.7264	0.370049	4.74424	0.652375	0.0769042	0.28494	10	115
STAD	BIRC6	43.9024	0.0733113	7.39057	0.395497	-0.0507861	0.425217	11	114
STAD	CDH12	35.6729	0.116098	0.729324	0.804732	-0.00657907	0.443185	12	113
STAD	ASCC3	28.8564	0.324761	4.97949	0.390334	0.0282819	0.949882	12	113
STAD	CPAMD8	28.8564	0.458279	-7.38245	0.178597	0.00508112	0.399647	12	113
STAD	DYNC2H1	-5.25985	0.72388	-3.49792	0.602771	-0.0507861	0.555998	15	110
STAD	UHRF1BP1	29.2192	0.129721	-1.27733	0.974591	-0.0234539	0.238601	10	115
STAD	CNTLN	36.2682	0.399647	-2.81034	0.594609	-0.00887266	0.532394	12	113
STAD	ERBB4	29.1314	0.205885	-2.40813	0.50135	-0.0508721	0.123934	15	110
STAD	ANK3	29.1022	0.984846	-3.49828	0.515967	-0.00581564	0.978786	15	110
STAD	ITGB4	45.4212	0.00408982	3.96247	0.452787	-0.0743937	0.0708539	10	115
STAD	ABCC9	31.9599	0.579574	7.39057	0.375832	0.0327032	0.671125	13	112
STAD	EPHA3	-14.8245	0.709195	5.52617	0.600426	0.053046	0.635853	12	113
STAD	PXDN	28.0234	0.395735	4.02236	0.87162	-0.0109832	0.58459	19	106
STAD	MYT1	-20.8123	0.436524	-5.03083	0.974591	0.0102625	0.545065	10	115
STAD	KALRN	29.3419	0.280273	-2.03601	0.552214	-0.0420835	0.239292	13	112
STAD	GRIA2	-1.83546	0.550532	-2.03601	0.62862	0.024845	0.314147	11	114
STAD	SEMA5A	-3.86421	0.678827	23.7465	0.0343598	0.105905	0.0498653	10	115
STAD	KIF1B	14.749	0.374928	-5.59536	0.238601	-0.0637467	0.129721	10	115
STAD	RGS12	8.42151	0.92988	-6.53152	0.453216	-0.0201624	1	12	113
STAD	JARID2	-16.3126	0.370057	-13.0563	0.0202784	-0.0107584	0.586385	14	111
STAD	DOCK2	3.39798	0.795358	-0.750229	0.931106	0.010561	0.569512	10	115
STAD	SMAD4	23.6979	0.381153	1.2848	0.996657	-0.0150764	0.606268	12	113
STAD	DSCAML1	38.8187	0.0670763	7.90756	0.543457	-0.0183312	0.354416	12	113
STAD	HUWE1	31.4216	0.0709151	14.3711	0.103096	0.0252817	0.936543	12	113
STAD	GPATCH2	16.7905	0.28494	-8.30256	0.323454	-0.0590102	0.120757	10	115
STAD	PLEC	34.8092	0.24167	9.50813	0.0723882	0.0585969	0.519948	18	107
STAD	PCDH1	-8.11817	0.960081	-4.26605	0.678827	-0.00299327	0.89502	10	115
STAD	KIAA1429	29.2557	0.36521	-8.35774	0.539036	-0.0557939	0.182467	10	115
STAD	COL12A1	13.5884	0.797891	3.61584	0.168316	0.0307952	0.442348	22	103
STAD	CUBN	27.7232	0.220589	-0.816139	0.89754	-0.0079053	0.323528	21	104
STAD	CSMD3	-8.74912	0.752724	6.10885	0.184615	0.0374042	0.478858	30	95
STAD	SYCP2	33.3254	0.341613	6.10809	0.370049	-0.0119242	0.938343	10	115
STAD	GRID1	20.5414	0.445144	3.97071	0.8583	-0.0109832	0.275615	15	110
STAD	CREBBP	31.4591	0.198295	9.03647	0.308562	0.0127419	0.690572	12	113
STAD	CTNND2	-23.695	0.586984	1.04568	0.348103	0.0399208	0.203174	15	110
STAD	SYNE2	33.3803	0.0599647	6.69635	0.453914	-0.0158533	0.262033	18	107
STAD	APOB	29.9925	0.677384	-0.84296	0.692543	-0.0107716	0.947913	19	106
STAD	SCN3A	18.0481	0.798253	4.28209	0.606268	0.0141698	0.606268	12	113
STAD	MAP2	18.3528	0.996877	-1.11983	0.959417	0.025804	0.757149	14	111
STAD	FMN2	40.2683	0.0896572	11.1744	0.116461	-0.0133568	0.575705	10	115
STAD	FAT4	-20.4207	0.357045	0.983204	0.64614	0.0253751	0.411056	35	90
STAD	SPTBN4	33.4835	0.64418	10.3461	0.163627	0.0292663	0.602381	16	109
STAD	DNAH1	11.3661	0.830658	15.6576	0.188511	0.0797005	0.346253	10	115
STAD	GNAS	-3.528	0.622447	3.09933	0.757036	0.0166248	0.797112	11	114
STAD	UTRN	-23.7021	0.308562	6.74045	0.285283	0.0620835	0.345774	12	113
STAD	SIPA1L3	29.1541	0.211464	5.41388	0.186056	0.0206815	0.861956	13	112
STAD	NAV3	-16.8876	0.513114	2.18194	0.561848	0.0442507	0.320259	16	109
STAD	SPTA1	-12.5109	0.315615	-0.816139	0.845917	0.0500253	0.234722	23	102
STAD	SPEG	33.0407	0.153035	-2.91268	0.684405	-0.0288684	0.345774	12	113
STAD	PLXNA4	28.8564	0.295973	2.16352	0.468981	0.0152198	0.959417	14	111
STAD	SLIT2	-28.9534	0.313974	-0.227878	0.489253	0.102879	0.40255	13	112
STAD	ZBTB20	35.4604	0.489253	10.9401	0.358643	0.0334954	0.557635	13	112
STAD	NID1	29.5718	0.4685	-1.60459	0.824247	-0.0119242	0.804732	12	113
STAD	VPS13B	18.0481	0.484968	1.60645	0.879589	0.025804	0.879589	16	109
STAD	KIAA0100	29.1022	0.803847	-13.8634	0.0678884	-0.0579627	0.244658	11	114
STAD	DST	28.5613	0.289913	-1.65823	0.835664	-0.00508483	0.733065	18	107
STAD	ARID1A	-1.83546	0.155206	5.30323	0.28734	0.00331461	0.46627	35	90
STAD	ZFP64	29.1022	0.844545	-2.03601	0.865059	0.0294387	0.737234	11	114
STAD	TNS3	50.4631	0.000237946	24.1233	0.00244886	0.0234529	0.734297	12	113
STAD	PKHD1L1	12.2756	0.793124	4.51954	0.829546	0.025804	1	14	111
STAD	MUC17	-1.46937	0.329775	2.09457	0.607554	0.0107584	0.89384	13	112
STAD	NCAN	13.9028	0.521447	7.32641	0.198295	0.0378437	1	12	113
STAD	NFASC	32.1746	0.229124	-1.38811	0.896646	0.00618042	0.727994	12	113
STAD	ABCA12	-3.528	0.930378	-3.14718	0.990907	0.0166248	0.8583	15	110
STAD	ABCC4	-0.697592	0.575705	-2.7567	0.767413	0.0454577	0.53304	10	115
STAD	RYR2	-3.528	0.968893	6.43758	0.172293	0.0262782	0.392596	27	98
STAD	TDRD6	-3.528	0.666191	10.9092	0.262778	0.0220728	0.659867	11	114
STAD	DNAH3	28.0951	0.394272	11.1758	0.201899	0.0162043	0.795425	20	105
STAD	ITPR1	29.9925	0.281804	3.09933	0.420175	0.0535182	0.824137	11	114
STAD	COL7A1	34.1916	0.0406425	2.21638	0.721692	-0.0164105	0.400031	14	111
STAD	RP1L1	29.3646	0.167189	5.09507	0.711101	-0.053147	0.357881	11	114
STAD	RNF213	13.5884	0.620068	6.17279	0.538358	0.0298663	0.749003	18	107
STAD	EPHA6	33.7706	0.492036	6.70024	0.458284	-0.0293643	0.866303	10	115
STAD	MED23	41.0905	0.0172271	2.78051	0.464207	-0.0573702	0.160553	13	112
STAD	FRYL	-5.25985	0.550532	-2.24068	0.961771	0.029931	0.574045	11	114
STAD	FSHR	-15.0419	0.256136	-5.35566	0.956558	0.025804	0.316594	12	113
STAD	AKAP13	31.9753	0.0330803	-2.44602	0.242536	-0.0625282	0.0134815	13	112
STAD	NRXN1	38.2439	0.168015	-4.36468	0.571604	-0.0248951	0.308562	12	113
STAD	NIPBL	44.0042	0.0161243	0.435355	0.574052	-0.0528758	0.239292	13	112
STAD	MUC16	0.284277	0.820137	-1.65561	0.491873	0.0224079	0.803921	42	83
STAD	BTBD11	41.2797	0.314615	7.81878	0.14919	0.050051	0.652375	10	115
STAD	AHNAK	32.6746	0.2856	-2.31686	0.979366	-0.0342912	0.649489	16	109
STAD	CTNNA2	19.6504	0.880642	3.48618	0.384803	0.041428	0.379846	10	115
STAD	ZFHX3	35.4604	0.0590331	-0.816139	0.89423	-0.053147	0.211384	15	110
STAD	SPAG17	57.3469	0.100464	-0.140295	0.497789	-0.132601	0.0410504	10	115
STAD	ZNF804B	29.0201	0.29232	-0.57765	0.6709	-0.0329387	0.687137	16	109
STAD	LRBA	36.991	0.0554139	23.834	0.0039736	0.025804	0.607135	10	115
STAD	GREB1	40.1692	0.144125	-0.700524	0.99637	-0.0234158	0.194702	10	115
STAD	RIMS2	-4.91317	0.932914	-2.94276	0.749058	0.0311481	0.884878	20	105
STAD	RERE	7.33234	0.677032	-10.8025	0.283891	-0.0542615	0.350238	13	112
STAD	DOCK9	40.8953	0.272822	-5.09669	0.916651	-0.0590102	0.238601	10	115
STAD	BAZ2A	28.0586	0.492036	6.10809	0.952831	-0.0513536	0.272822	10	115
STAD	MLLT4	-27.0245	0.983868	-3.12036	0.868316	-0.00581564	0.706859	13	112
STAD	HECW1	17.6357	0.458284	20.1322	0.0862702	0.0321731	0.268861	10	115
STAD	DCHS2	18.3528	0.641843	-5.35566	0.376613	-0.0687166	0.29677	12	113
STAD	PCDH15	-15.1747	0.178825	15.309	0.0428502	0.062839	0.0407763	19	106
STAD	FREM2	-5.75944	0.678827	5.53908	0.563352	0.0598039	0.981849	10	115
STAD	NCOR2	37.4997	0.301743	-6.45037	0.207927	-0.0927077	0.151692	11	114
STAD	SCN1A	41.9645	0.0220951	-4.33508	0.497789	-0.0753133	0.0488134	10	115
STAD	HLA-B	-4.04725	0.766076	1.42039	0.69676	0.049444	0.363194	12	113
STAD	ABCA13	50.432	0.0663889	3.96247	0.449978	-0.079007	0.226468	14	111
STAD	NALCN	10.8483	0.344213	5.09507	0.996969	-0.0507861	0.396936	15	110
STAD	MXRA5	29.5718	0.484064	2.16352	0.409094	0.0454577	0.772481	12	113
STAD	MDC1	-1.83546	0.983868	-2.40813	0.435119	-0.0528758	0.362893	13	112
STAD	COL24A1	42.2398	0.0705571	-2.61347	0.968718	-0.0584847	0.180988	11	114
STAD	RYR1	33.7315	0.0267809	-2.03601	0.962661	-0.0508721	0.115558	17	108
STAD	FHOD3	27.6713	0.550532	14.8621	0.154196	0.0267028	0.871917	11	114
STAD	MYH7	-11.1734	0.956558	-12.3762	0.186853	-0.0335436	0.478845	12	113
STAD	ITSN2	41.3935	0.05041	14.2853	0.156731	-0.00581564	0.591987	11	114
STAD	PLCB1	29.1022	0.968718	-2.24068	0.975667	-0.0507861	0.92017	11	114
STAD	ERBB3	-13.951	0.913254	-9.47076	0.892549	0.029931	0.527503	11	114
STAD	HTT	31.8362	0.226621	-0.227878	0.579574	0.00331461	0.874685	13	112
STAD	CNTN4	10.9172	0.588185	-5.59536	0.581929	-0.02584	0.521151	10	115
STAD	SIPA1L1	46.513	0.00520125	-5.45147	0.63612	-0.125428	0.0286899	13	112
STAD	ZNF536	-30.7572	0.2856	-2.94276	0.709011	0.0313835	0.150629	16	109
STAD	COL1A2	32.2295	0.453216	-1.70692	0.811224	0.00976879	0.98997	12	113
STAD	STAB2	30.0444	0.186056	3.09933	0.313974	0.0294387	0.731052	13	112
STAD	GTF3C1	44.0042	0.00952402	-2.03601	0.98957	-0.0584847	0.0436462	11	114
STAD	NRXN2	42.2987	0.0467654	0.449172	0.945585	-0.0300704	0.185471	10	115
STAD	CMYA5	18.3528	0.391321	-2.50292	0.374252	-0.0453401	0.15085	14	111
STAD	PLEKHG4	12.7422	0.795358	2.31162	0.469388	0.0705154	0.231427	10	115
STAD	ANK2	11.7603	0.271372	1.05911	0.769087	-0.0158533	0.431419	14	111
STAD	TNKS1BP1	39.7609	0.0186511	9.98393	0.420602	-0.0290643	0.293219	10	115
STAD	PCDHA3	4.78908	0.981849	7.16127	0.539036	0.0374042	0.458284	10	115
STAD	RIF1	28.8105	0.923875	7.88285	0.305937	0.0637333	0.305937	10	115
STAD	SSPO	-10.8122	0.811284	-2.40058	0.508285	0.0137264	0.775076	14	111
STAD	DNAH10	43.9511	0.0305926	9.36488	0.0855566	0.0127419	0.595478	18	107
STAD	UBR4	-4.04725	0.709195	4.58403	0.526906	0.0201334	0.672134	12	113
STAD	FAT3	-6.92898	0.918475	3.38201	0.385091	0.0416539	0.499331	29	96
STAD	NEBL	-48.3838	0.323454	13.9226	0.197852	0.124098	0.127433	10	115
STAD	TNXB	12.7422	0.285253	12.9555	0.146448	0.0218749	0.692592	14	111
STAD	PTEN	-11.0869	0.549031	-2.02442	0.936543	-0.00751996	0.672134	12	113
STAD	GPR98	15.7265	0.699691	-11.1351	0.015461	-0.072204	0.0291445	22	103
STAD	CELSR1	29.5718	0.48842	-2.31686	0.575657	-0.0519108	0.454687	14	111
STAD	SEMA6D	12.7112	0.732906	1.73259	0.360411	0.0278303	0.678827	10	115
STAD	MICAL3	31.4591	0.629888	19.8047	0.108519	0.0819552	0.372106	12	113
STAD	LRP2	30.0444	0.443234	2.78051	0.677384	-0.0109832	0.74394	19	106
STAD	FSIP2	-31.1041	0.268861	5.67682	0.672175	0.0703172	0.257219	10	115
STAD	TACC2	13.9028	0.538358	7.59012	0.0855566	0.0479031	0.3775	18	107
STAD	PDZD2	30.0444	0.308146	5.09507	0.381533	0.0206815	0.899701	17	108
STAD	CDH23	13.0368	0.619918	-13.6414	0.0708539	-0.0368489	0.151772	10	115
STAD	SLITRK6	-20.0453	0.682959	-5.5681	0.913057	-0.00581564	0.906645	13	112
STAD	MYOM2	18.5026	0.409094	-10.2324	0.204205	-0.060701	0.2741	12	113
STAD	EDNRB	-8.66082	0.978786	1.19084	0.624112	0.040713	0.8583	15	110
STAD	GRM1	37.5516	0.194262	2.09457	0.624625	-0.053147	0.146574	13	112
STAD	CDH10	12.2424	0.719249	-9.61211	0.210827	-0.0848592	0.176568	10	115
STAD	CNTNAP2	-5.75944	0.759687	-0.852565	0.843871	0.0203826	0.778902	12	113
STAD	TRRAP	36.0073	0.0674036	3.96247	0.346091	-0.000411367	0.53234	16	109
STAD	DCC	16.5055	0.740619	25.4069	0.00195731	0.0983085	0.143627	12	113
STAD	DCDC1	16.6745	0.301657	4.98643	0.458284	-0.026284	0.588185	10	115
STAD	EVC2	10.0726	0.712881	-0.816139	0.861956	0.0166248	0.749375	13	112
STAD	PRDM9	-19.8965	0.463817	-9.23748	0.405026	-0.009136	0.767413	10	115
STAD	ROBO2	34.7543	0.277794	3.42612	0.433283	0.010561	0.843871	12	113
STAD	SCN9A	-8.39908	0.743251	-0.153835	0.958075	0.0327032	0.520243	13	112
STAD	NCKAP5	-1.46937	0.951632	-1.75941	0.887448	0.00331461	0.792666	13	112
STAD	VPS13D	14.749	0.374252	7.86742	0.18453	0.0191489	0.835654	14	111
STAD	SCN10A	39.7609	0.0375786	-2.81034	0.575705	-0.0637467	0.0542648	10	115
STAD	HDLBP	-20.4511	0.600426	0.901736	0.69676	0.0464421	0.612136	12	113
STAD	REV3L	-3.528	0.54585	4.34118	0.787386	0.029931	0.900241	15	110
STAD	AKAP9	21.0916	0.0580769	7.46527	0.089466	0.038686	0.830177	18	107
STAD	LAMA5	13.4576	0.740619	2.01036	0.571604	0.0454577	0.721709	12	113
STAD	LAMA1	29.1314	0.110645	6.43758	0.188707	-0.0420835	0.496116	17	108
STAD	DOCK3	-1.83546	0.694871	3.09933	0.40255	0.040713	0.665239	13	112
STAD	COL15A1	-15.0594	0.607135	0.26311	0.873468	0.0152198	0.767413	10	115
STAD	TIAM2	11.8762	0.474995	-3.42033	0.497789	-0.0590102	0.227898	10	115
STAD	DSP	29.6267	0.314615	-2.31686	0.837762	-0.0513536	0.497789	10	115
STAD	ARID1B	30.2549	0.362893	13.5363	0.232895	0.024845	0.792666	13	112
STAD	F8	41.8375	0.13467	24.2405	0.0315848	0.0358197	0.715443	12	113
STAD	MYH9	19.9737	0.310256	-2.50292	0.739767	-0.0252826	0.301657	10	115
STAD	TEP1	32.1746	0.341613	-10.9452	0.264941	-0.0598	0.146641	10	115
STAD	PIK3CA	-11.0869	0.369652	-0.887841	0.824267	0.000929926	0.520551	28	97
STAD	RTTN	29.9925	0.704619	-3.70325	0.92017	0.0294387	0.982618	11	114
STAD	CR1	-5.49174	0.954827	7.07176	0.899444	0.040713	0.641043	11	114
STAD	PCDHA9	-3.528	0.244658	-0.153835	0.961771	-0.0466486	0.274084	11	114
STAD	MKI67	35.198	0.430375	2.78051	0.435119	0.0327032	0.842929	13	112
STAD	EPB41L3	18.8964	0.114693	-4.74572	0.400031	-0.0723204	0.0244045	14	111
STAD	CHD3	-5.25985	0.616301	-3.49828	0.13053	-0.0626756	0.109784	11	114
STAD	DYSF	32.0193	0.214436	11.5466	0.236078	0.0215806	0.887448	13	112
STAD	ALMS1	29.1541	0.401183	2.78051	0.936418	-0.0128961	0.50135	15	110
STAD	GLI3	-4.04725	0.880642	-5.84632	0.355652	-0.0343022	0.545065	10	115
STAD	NFATC4	30.9576	0.257219	8.97776	0.305937	0.0218749	0.99637	10	115
STAD	ATP2B2	-10.4116	0.551128	24.3704	0.1795	0.12487	0.0565833	10	115
STAD	DOCK1	35.6412	0.0846159	-2.31686	0.719249	-0.0555329	0.127433	10	115
STAD	PCDH10	14.3039	0.522682	0.449172	0.592125	-0.0327514	0.597243	16	109
STAD	ITIH5	-4.91317	0.923221	5.74151	0.394974	0.0201334	0.554632	12	113
STAD	AHNAK2	28.5219	0.344385	2.78051	0.672359	0.00331461	0.77009	19	106
STAD	ATP10A	42.831	0.0302816	-0.0930057	0.969917	-0.0869827	0.0881099	12	113
STAD	ZNF43	41.1311	0.093426	-0.816139	0.94095	-0.00740011	0.415168	11	114
STAD	PCSK5	36.4282	0.100464	9.46286	0.607135	-0.0290643	0.436524	10	115
STAD	PRKDC	28.5219	0.120265	7.96738	0.131534	0.0198893	0.972727	15	110
STAD	EIF5B	-4.91317	0.732906	-2.9964	0.53304	-0.0249863	0.909433	10	115
STAD	MYH10	29.1951	0.269258	6.04214	0.764721	-0.0183312	0.405775	16	109
STAD	MDN1	-10.8122	0.980365	-2.33554	0.991584	0.00415409	0.874284	18	107
STAD	TG	-1.83546	0.469159	7.39057	0.255822	0.0206815	0.798907	13	112
STAD	RUSC2	40.2683	0.0520262	7.62602	0.458284	-0.019877	0.305937	10	115
STAD	PCDHA11	39.5092	0.0292847	-0.816139	0.951632	-0.0573702	0.0948979	13	112
STAD	CDH1	28.5811	0.0767253	-4.21792	0.220955	-0.0953854	0.0181996	10	115
STAD	MUC5B	32.5956	0.0489676	4.95082	0.503279	-0.0341845	0.278254	14	111
STAD	ST18	27.6713	0.488419	-3.3257	0.456203	-0.00581564	0.400361	11	114
STAD	RASA1	-11.1811	0.450952	-0.816139	0.961771	0.0591966	0.574045	11	114
STAD	CDH11	32.9761	0.469388	1.06427	0.698931	0.00336185	0.746649	10	115
STAD	PTPRS	30.0444	0.167189	-2.03601	0.899444	-0.0463632	0.415168	11	114
STAD	HSPG2	13.1415	0.38523	-6.83164	0.259767	-0.026284	0.136476	16	109
STAD	TNS1	33.0407	0.116338	9.55545	0.357558	-0.0183312	0.53234	16	109
STAD	LARP4B	29.1541	0.169883	-0.816139	0.653568	0.00380685	0.488419	11	114
STAD	COL4A2	33.3803	0.314615	-6.59745	0.902223	0.00172216	0.672175	10	115
STAD	RELN	37.7621	0.12401	-2.24068	0.538956	-0.0537395	0.159298	11	114
STAD	CACNA1B	11.8762	0.974591	-6.08661	0.474995	0.00663195	0.645828	10	115
STAD	DNAH5	28.78	0.20247	1.19084	0.385841	0.0416539	0.81217	25	100
STAD	RYR3	19.03	0.49431	7.39057	0.590445	0.0206775	0.871473	21	104
STAD	MACF1	12.1596	0.646975	6.69635	0.169471	0.0464421	0.602648	14	111
STAD	OTOF	2.95282	0.923875	-2.3705	0.53304	-0.0555329	0.581929	10	115
STAD	C3	-4.04725	0.494595	2.09324	0.577315	0.0191489	0.824247	12	113
STAD	FLG2	-50.9481	0.0365315	11.132	0.160393	0.085159	0.0126587	12	113
STAD	FBN2	2.69516	0.922046	-4.36494	1	0.0267885	0.751202	14	111
STAD	POLQ	38.2439	0.0498738	1.60645	0.681074	-0.0159852	0.374252	14	111
STAD	FRAS1	45.9358	0.0565833	6.69635	0.463817	-0.00156501	0.268861	10	115
STAD	SLCO6A1	29.5604	0.28494	1.77837	0.99637	-0.0460828	0.310256	10	115
STAD	CSMD2	-3.528	0.899701	21.9667	0.136944	0.0334954	0.500685	17	108
STAD	PTPRT	19.03	0.909662	-2.20449	0.780626	0.0334954	0.58459	19	106
STAD	FREM1	41.9326	0.0313797	3.24089	0.551128	0.025804	0.26106	10	115
STAD	PCDHA6	-20.8426	0.376613	5.52617	0.588818	0.0434419	0.409094	12	113
STAD	EP400	31.8801	0.195388	9.76923	0.367633	0.0218749	0.798253	12	113
STAD	PCDHA1	23.7929	0.327934	-2.1961	0.767413	-0.0473842	0.332454	10	115
STAD	LPHN3	35.4604	0.121894	7.07176	0.477546	-0.0152569	0.579997	11	114
STAD	AUTS2	13.1415	0.753314	23.7465	0.0255205	0.0650553	0.15064	12	113
STAD	CUL9	2.75551	0.817704	-2.24068	0.906645	0.0198893	0.861956	13	112
STAD	ATF7IP	19.4721	0.600426	16.4299	0.292907	0.0368042	0.618029	12	113
STAD	ARID2	39.3604	0.0219001	-2.91268	0.653892	-0.0729837	0.0646133	12	113
STAD	GPATCH8	39.5092	0.0368709	2.78051	0.538956	-0.0507861	0.262778	11	114
STAD	ROBO1	36.5269	0.176568	-5.51163	0.5094	-0.0260961	0.26106	10	115
