# Supplementary material for: Ribosomal DNA copy number amplification and loss in human cancers is linked to tumor genetic context, nucleolus activity, and proliferation
Source: PLoS Genet. 2017 Sep 7;13(9):e1006994. doi: 10.1371/journal.pgen.1006994 (PMC5605086; doi:10.1371/journal.pgen.1006994)
Supplement: S7 Table — (XLSX) [file pgen.1006994.s017.xlsx]

## Sheet: Sheet1
S7 Table. Association between rDNA CN with proliferation index (PRI)
# Rho.* and P.*: Spearman's correlation betweem 45S CN(or 5S CN, or the ratio of 5S/45S) with PRI in tumor
A. PRI genes extracted from Sandberg, R. et al were used
CancerType	Rho.45S	P.45S	Rho.5S	P.5S	Rho.ratio	P.ratio
LUAD	-0.161758	0.0141267	0.0732554	0.268331	0.193347	0.00328534
LUSC	-0.119232	0.408373	0.170708	0.235144	0.248403	0.0820865
STAD	-0.120073	0.229329	0.0170313	0.865088	0.0623973	0.533269
KIRC	0.243693	0.110866	0.201973	0.188005	-0.0332629	0.829916
HNSC	-0.0540845	0.506698	0.11355	0.162252	0.147649	0.0685558
BLCA	0.125715	0.18431	0.186489	0.0480807	0.117182	0.21609
B. PRI genes from Waldman, Y.Y. et al were used.
CancerType	Rho.45S	P.45S	Rho.5S	P.5S	Rho.ratio	P.ratio
LUAD	-0.137651	0.0369659	0.117183	0.0761279	0.232207	0.000383671
LUSC	-0.225738	0.114868	0.141032	0.32756	0.246194	0.0849123
STAD	-0.072327	0.470042	0.0827483	0.40833	0.0855077	0.392823
KIRC	0.220296	0.150395	0.11938	0.438915	-0.0425652	0.783281
HNSC	-0.0811512	0.318668	0.0708274	0.384303	0.106875	0.188543
BLCA	0.0560794	0.555211	0.182423	0.053127	0.150614	0.111307
Note:
Sandberg, R. et al	Sandberg, R., Neilson, J.R., Sarma, A., Sharp, P.A. and Burge, C.B. (2008) Proliferating cells express mRNAs with shortened 3' untranslated regions and fewer microRNA target sites. Science, 320, 1643-1647.
Waldman, Y.Y. et al	Waldman, Y.Y., Geiger, T. and Ruppin, E. (2013) A genome-wide systematic analysis reveals different and predictive proliferation expression signatures of cancerous vs. non-cancerous cells. PLoS Genet, 9, e1003806.
